# Supplementary material for: Epidemiological transition to mortality and refracture following an initial fracture
Source: eLife. 2021 Feb 9;10:e61142. doi: 10.7554/eLife.61142 (PMC7924952; doi:10.7554/eLife.61142)
Supplement: Figure 3—figure supplement 1—source data 1. — Risk was estimated for women and men with different BMD profiles (i.e., T-score = 0, –1.5, and −2.5), at different event ages (60, 70, and 80), with all other factors being at the sample mean, that is, body massindex = 26.6 kg/m2 (equal to mean), no history of fall at baseline, no prior fracture and no comorbidities. [file elife-61142-fig3-figsupp1-data1.xlsx]

## Sheet: Women, Age = 60, T-score = 0
	survival.prob	state	times
1	0	State 1: No fracture	0
2	0.00267774	State 1: No fracture	0.43002
3	0.00534772	State 1: No fracture	0.86004
4	0.00800997	State 1: No fracture	1.29006
5	0.0106646	State 1: No fracture	1.72008
6	0.0133115	State 1: No fracture	2.1501
7	0.015951	State 1: No fracture	2.58012
8	0.0185831	State 1: No fracture	3.01014
9	0.0212079	State 1: No fracture	3.44016
10	0.0238256	State 1: No fracture	3.87018
11	0.0264363	State 1: No fracture	4.3002
12	0.0290401	State 1: No fracture	4.73022
13	0.0316373	State 1: No fracture	5.16024
14	0.034228	State 1: No fracture	5.59026
15	0.0368124	State 1: No fracture	6.02028
16	0.0393906	State 1: No fracture	6.4503
17	0.0419629	State 1: No fracture	6.88032
18	0.0445294	State 1: No fracture	7.31034
19	0.0470905	State 1: No fracture	7.74036
20	0.0496461	State 1: No fracture	8.17038
21	0.0521967	State 1: No fracture	8.6004
22	0.0547423	State 1: No fracture	9.03042
23	0.0572832	State 1: No fracture	9.46044
24	0.0598196	State 1: No fracture	9.89046
25	0.0623518	State 1: No fracture	10.3205
26	0.0648798	State 1: No fracture	10.7505
27	0.067404	State 1: No fracture	11.1805
28	0.0699245	State 1: No fracture	11.6105
29	0.0724415	State 1: No fracture	12.0406
30	0.0749553	State 1: No fracture	12.4706
31	0.0774661	State 1: No fracture	12.9006
32	0.079974	State 1: No fracture	13.3306
33	0.0824792	State 1: No fracture	13.7606
34	0.084982	State 1: No fracture	14.1907
35	0.0874825	State 1: No fracture	14.6207
36	0.089981	State 1: No fracture	15.0507
37	0.0924775	State 1: No fracture	15.4807
38	0.0949723	State 1: No fracture	15.9107
39	0.0974656	State 1: No fracture	16.3408
40	0.0999576	State 1: No fracture	16.7708
41	0.102448	State 1: No fracture	17.2008
42	0.104938	State 1: No fracture	17.6308
43	0.107427	State 1: No fracture	18.0608
44	0.109915	State 1: No fracture	18.4909
45	0.112403	State 1: No fracture	18.9209
46	0.11489	State 1: No fracture	19.3509
47	0.117377	State 1: No fracture	19.7809
48	0.119863	State 1: No fracture	20.2109
49	0.12235	State 1: No fracture	20.641
50	0.124837	State 1: No fracture	21.071
51	0.127324	State 1: No fracture	21.501
52	0	State 2: Initial fracture	0
53	0.00255263	State 2: Initial fracture	0.43002
54	0.00509843	State 2: Initial fracture	0.86004
55	0.00764193	State 2: Initial fracture	1.29006
56	0.0101873	State 2: Initial fracture	1.72008
57	0.0127386	State 2: Initial fracture	2.1501
58	0.0152991	State 2: Initial fracture	2.58012
59	0.0178724	State 2: Initial fracture	3.01014
60	0.0204614	State 2: Initial fracture	3.44016
61	0.0230689	State 2: Initial fracture	3.87018
62	0.0256974	State 2: Initial fracture	4.3002
63	0.0283492	State 2: Initial fracture	4.73022
64	0.0310264	State 2: Initial fracture	5.16024
65	0.033731	State 2: Initial fracture	5.59026
66	0.0364645	State 2: Initial fracture	6.02028
67	0.0392286	State 2: Initial fracture	6.4503
68	0.0420246	State 2: Initial fracture	6.88032
69	0.0448537	State 2: Initial fracture	7.31034
70	0.0477169	State 2: Initial fracture	7.74036
71	0.0506151	State 2: Initial fracture	8.17038
72	0.0535491	State 2: Initial fracture	8.6004
73	0.0565195	State 2: Initial fracture	9.03042
74	0.0595269	State 2: Initial fracture	9.46044
75	0.0625718	State 2: Initial fracture	9.89046
76	0.0656543	State 2: Initial fracture	10.3205
77	0.0687747	State 2: Initial fracture	10.7505
78	0.0719332	State 2: Initial fracture	11.1805
79	0.0751299	State 2: Initial fracture	11.6105
80	0.0783646	State 2: Initial fracture	12.0406
81	0.0816373	State 2: Initial fracture	12.4706
82	0.0849478	State 2: Initial fracture	12.9006
83	0.0882959	State 2: Initial fracture	13.3306
84	0.0916813	State 2: Initial fracture	13.7606
85	0.0951036	State 2: Initial fracture	14.1907
86	0.0985624	State 2: Initial fracture	14.6207
87	0.102057	State 2: Initial fracture	15.0507
88	0.105588	State 2: Initial fracture	15.4807
89	0.109154	State 2: Initial fracture	15.9107
90	0.112754	State 2: Initial fracture	16.3408
91	0.116388	State 2: Initial fracture	16.7708
92	0.120055	State 2: Initial fracture	17.2008
93	0.123756	State 2: Initial fracture	17.6308
94	0.127488	State 2: Initial fracture	18.0608
95	0.131251	State 2: Initial fracture	18.4909
96	0.135045	State 2: Initial fracture	18.9209
97	0.138869	State 2: Initial fracture	19.3509
98	0.142721	State 2: Initial fracture	19.7809
99	0.146602	State 2: Initial fracture	20.2109
100	0.150511	State 2: Initial fracture	20.641
101	0.154446	State 2: Initial fracture	21.071
102	0.158408	State 2: Initial fracture	21.501
103	0	State 3: Second fracture	0
104	0.00225781	State 3: Second fracture	0.43002
105	0.00502263	State 3: Second fracture	0.86004
106	0.00826236	State 3: Second fracture	1.29006
107	0.0119465	State 3: Second fracture	1.72008
108	0.0160461	State 3: Second fracture	2.1501
109	0.0205337	State 3: Second fracture	2.58012
110	0.0253831	State 3: Second fracture	3.01014
111	0.0305697	State 3: Second fracture	3.44016
112	0.0360699	State 3: Second fracture	3.87018
113	0.0418613	State 3: Second fracture	4.3002
114	0.0479229	State 3: Second fracture	4.73022
115	0.0542346	State 3: Second fracture	5.16024
116	0.0607774	State 3: Second fracture	5.59026
117	0.0675332	State 3: Second fracture	6.02028
118	0.074485	State 3: Second fracture	6.4503
119	0.0816165	State 3: Second fracture	6.88032
120	0.0889124	State 3: Second fracture	7.31034
121	0.0963582	State 3: Second fracture	7.74036
122	0.10394	State 3: Second fracture	8.17038
123	0.111645	State 3: Second fracture	8.6004
124	0.119461	State 3: Second fracture	9.03042
125	0.127376	State 3: Second fracture	9.46044
126	0.135379	State 3: Second fracture	9.89046
127	0.143459	State 3: Second fracture	10.3205
128	0.151608	State 3: Second fracture	10.7505
129	0.159815	State 3: Second fracture	11.1805
130	0.168072	State 3: Second fracture	11.6105
131	0.17637	State 3: Second fracture	12.0406
132	0.184702	State 3: Second fracture	12.4706
133	0.19306	State 3: Second fracture	12.9006
134	0.201438	State 3: Second fracture	13.3306
135	0.209828	State 3: Second fracture	13.7606
136	0.218225	State 3: Second fracture	14.1907
137	0.226622	State 3: Second fracture	14.6207
138	0.235015	State 3: Second fracture	15.0507
139	0.243398	State 3: Second fracture	15.4807
140	0.251767	State 3: Second fracture	15.9107
141	0.260117	State 3: Second fracture	16.3408
142	0.268443	State 3: Second fracture	16.7708
143	0.276742	State 3: Second fracture	17.2008
144	0.28501	State 3: Second fracture	17.6308
145	0.293243	State 3: Second fracture	18.0608
146	0.301439	State 3: Second fracture	18.4909
147	0.309594	State 3: Second fracture	18.9209
148	0.317706	State 3: Second fracture	19.3509
149	0.325771	State 3: Second fracture	19.7809
150	0.333788	State 3: Second fracture	20.2109
151	0.341754	State 3: Second fracture	20.641
152	0.349667	State 3: Second fracture	21.071
153	0.357525	State 3: Second fracture	21.501
154	0	State 4: Third & further fracture	0
155	0.0466751	State 4: Third & further fracture	0.43002
156	0.0911717	State 4: Third & further fracture	0.86004
157	0.133591	State 4: Third & further fracture	1.29006
158	0.174031	State 4: Third & further fracture	1.72008
159	0.212583	State 4: Third & further fracture	2.1501
160	0.249336	State 4: Third & further fracture	2.58012
161	0.284374	State 4: Third & further fracture	3.01014
162	0.317775	State 4: Third & further fracture	3.44016
163	0.349618	State 4: Third & further fracture	3.87018
164	0.379975	State 4: Third & further fracture	4.3002
165	0.408915	State 4: Third & further fracture	4.73022
166	0.436504	State 4: Third & further fracture	5.16024
167	0.462805	State 4: Third & further fracture	5.59026
168	0.487879	State 4: Third & further fracture	6.02028
169	0.511782	State 4: Third & further fracture	6.4503
170	0.53457	State 4: Third & further fracture	6.88032
171	0.556294	State 4: Third & further fracture	7.31034
172	0.577004	State 4: Third & further fracture	7.74036
173	0.596747	State 4: Third & further fracture	8.17038
174	0.615569	State 4: Third & further fracture	8.6004
175	0.633512	State 4: Third & further fracture	9.03042
176	0.650618	State 4: Third & further fracture	9.46044
177	0.666926	State 4: Third & further fracture	9.89046
178	0.682472	State 4: Third & further fracture	10.3205
179	0.697293	State 4: Third & further fracture	10.7505
180	0.711422	State 4: Third & further fracture	11.1805
181	0.724891	State 4: Third & further fracture	11.6105
182	0.737732	State 4: Third & further fracture	12.0406
183	0.749973	State 4: Third & further fracture	12.4706
184	0.761643	State 4: Third & further fracture	12.9006
185	0.772769	State 4: Third & further fracture	13.3306
186	0.783375	State 4: Third & further fracture	13.7606
187	0.793486	State 4: Third & further fracture	14.1907
188	0.803125	State 4: Third & further fracture	14.6207
189	0.812314	State 4: Third & further fracture	15.0507
190	0.821074	State 4: Third & further fracture	15.4807
191	0.829426	State 4: Third & further fracture	15.9107
192	0.837387	State 4: Third & further fracture	16.3408
193	0.844977	State 4: Third & further fracture	16.7708
194	0.852213	State 4: Third & further fracture	17.2008
195	0.859111	State 4: Third & further fracture	17.6308
196	0.865687	State 4: Third & further fracture	18.0608
197	0.871956	State 4: Third & further fracture	18.4909
198	0.877932	State 4: Third & further fracture	18.9209
199	0.88363	State 4: Third & further fracture	19.3509
200	0.889062	State 4: Third & further fracture	19.7809
201	0.89424	State 4: Third & further fracture	20.2109
202	0.899176	State 4: Third & further fracture	20.641
203	0.903882	State 4: Third & further fracture	21.071
204	0.908368	State 4: Third & further fracture	21.501

## Sheet: Women, Age = 60, T-score = -1.5
	survival.prob	state	times
1	0	State 1: No fracture	0
2	0.00285864	State 1: No fracture	0.43002
3	0.00571206	State 1: No fracture	0.86004
4	0.00856036	State 1: No fracture	1.29006
5	0.0114037	State 1: No fracture	1.72008
6	0.0142423	State 1: No fracture	2.1501
7	0.0170763	State 1: No fracture	2.58012
8	0.0199062	State 1: No fracture	3.01014
9	0.0227322	State 1: No fracture	3.44016
10	0.0255547	State 1: No fracture	3.87018
11	0.0283742	State 1: No fracture	4.3002
12	0.031191	State 1: No fracture	4.73022
13	0.0340056	State 1: No fracture	5.16024
14	0.0368185	State 1: No fracture	5.59026
15	0.0396302	State 1: No fracture	6.02028
16	0.0424412	State 1: No fracture	6.4503
17	0.045252	State 1: No fracture	6.88032
18	0.0480631	State 1: No fracture	7.31034
19	0.0508751	State 1: No fracture	7.74036
20	0.0536885	State 1: No fracture	8.17038
21	0.0565038	State 1: No fracture	8.6004
22	0.0593216	State 1: No fracture	9.03042
23	0.0621424	State 1: No fracture	9.46044
24	0.0649668	State 1: No fracture	9.89046
25	0.0677952	State 1: No fracture	10.3205
26	0.0706283	State 1: No fracture	10.7505
27	0.0734664	State 1: No fracture	11.1805
28	0.0763102	State 1: No fracture	11.6105
29	0.0791601	State 1: No fracture	12.0406
30	0.0820167	State 1: No fracture	12.4706
31	0.0848803	State 1: No fracture	12.9006
32	0.0877514	State 1: No fracture	13.3306
33	0.0906305	State 1: No fracture	13.7606
34	0.0935181	State 1: No fracture	14.1907
35	0.0964145	State 1: No fracture	14.6207
36	0.0993201	State 1: No fracture	15.0507
37	0.102235	State 1: No fracture	15.4807
38	0.105161	State 1: No fracture	15.9107
39	0.108096	State 1: No fracture	16.3408
40	0.111043	State 1: No fracture	16.7708
41	0.114	State 1: No fracture	17.2008
42	0.116969	State 1: No fracture	17.6308
43	0.119949	State 1: No fracture	18.0608
44	0.122941	State 1: No fracture	18.4909
45	0.125945	State 1: No fracture	18.9209
46	0.128962	State 1: No fracture	19.3509
47	0.131991	State 1: No fracture	19.7809
48	0.135033	State 1: No fracture	20.2109
49	0.138088	State 1: No fracture	20.641
50	0.141156	State 1: No fracture	21.071
51	0.144238	State 1: No fracture	21.501
52	0	State 2: Initial fracture	0
53	0.00319225	State 2: Initial fracture	0.43002
54	0.00638523	State 2: Initial fracture	0.86004
55	0.00958606	State 2: Initial fracture	1.29006
56	0.0128013	State 2: Initial fracture	1.72008
57	0.016037	State 2: Initial fracture	2.1501
58	0.0192987	State 2: Initial fracture	2.58012
59	0.0225916	State 2: Initial fracture	3.01014
60	0.0259201	State 2: Initial fracture	3.44016
61	0.0292886	State 2: Initial fracture	3.87018
62	0.0327008	State 2: Initial fracture	4.3002
63	0.0361602	State 2: Initial fracture	4.73022
64	0.0396699	State 2: Initial fracture	5.16024
65	0.0432325	State 2: Initial fracture	5.59026
66	0.0468506	State 2: Initial fracture	6.02028
67	0.0505261	State 2: Initial fracture	6.4503
68	0.0542609	State 2: Initial fracture	6.88032
69	0.0580566	State 2: Initial fracture	7.31034
70	0.0619144	State 2: Initial fracture	7.74036
71	0.0658354	State 2: Initial fracture	8.17038
72	0.0698205	State 2: Initial fracture	8.6004
73	0.0738702	State 2: Initial fracture	9.03042
74	0.077985	State 2: Initial fracture	9.46044
75	0.0821651	State 2: Initial fracture	9.89046
76	0.0864106	State 2: Initial fracture	10.3205
77	0.0907213	State 2: Initial fracture	10.7505
78	0.095097	State 2: Initial fracture	11.1805
79	0.0995372	State 2: Initial fracture	11.6105
80	0.104042	State 2: Initial fracture	12.0406
81	0.108609	State 2: Initial fracture	12.4706
82	0.11324	State 2: Initial fracture	12.9006
83	0.117932	State 2: Initial fracture	13.3306
84	0.122685	State 2: Initial fracture	13.7606
85	0.127497	State 2: Initial fracture	14.1907
86	0.132369	State 2: Initial fracture	14.6207
87	0.137297	State 2: Initial fracture	15.0507
88	0.142282	State 2: Initial fracture	15.4807
89	0.147321	State 2: Initial fracture	15.9107
90	0.152414	State 2: Initial fracture	16.3408
91	0.157558	State 2: Initial fracture	16.7708
92	0.162753	State 2: Initial fracture	17.2008
93	0.167996	State 2: Initial fracture	17.6308
94	0.173287	State 2: Initial fracture	18.0608
95	0.178623	State 2: Initial fracture	18.4909
96	0.184003	State 2: Initial fracture	18.9209
97	0.189425	State 2: Initial fracture	19.3509
98	0.194888	State 2: Initial fracture	19.7809
99	0.20039	State 2: Initial fracture	20.2109
100	0.205929	State 2: Initial fracture	20.641
101	0.211503	State 2: Initial fracture	21.071
102	0.21711	State 2: Initial fracture	21.501
103	0	State 3: Second fracture	0
104	0.00366223	State 3: Second fracture	0.43002
105	0.00781027	State 3: Second fracture	0.86004
106	0.0124158	State 3: Second fracture	1.29006
107	0.0174516	State 3: Second fracture	1.72008
108	0.0228916	State 3: Second fracture	2.1501
109	0.028711	State 3: Second fracture	2.58012
110	0.0348859	State 3: Second fracture	3.01014
111	0.0413933	State 3: Second fracture	3.44016
112	0.0482115	State 3: Second fracture	3.87018
113	0.0553193	State 3: Second fracture	4.3002
114	0.0626968	State 3: Second fracture	4.73022
115	0.0703248	State 3: Second fracture	5.16024
116	0.0781849	State 3: Second fracture	5.59026
117	0.0862597	State 3: Second fracture	6.02028
118	0.0945322	State 3: Second fracture	6.4503
119	0.102987	State 3: Second fracture	6.88032
120	0.111607	State 3: Second fracture	7.31034
121	0.12038	State 3: Second fracture	7.74036
122	0.129291	State 3: Second fracture	8.17038
123	0.138326	State 3: Second fracture	8.6004
124	0.147474	State 3: Second fracture	9.03042
125	0.156721	State 3: Second fracture	9.46044
126	0.166056	State 3: Second fracture	9.89046
127	0.175469	State 3: Second fracture	10.3205
128	0.184948	State 3: Second fracture	10.7505
129	0.194485	State 3: Second fracture	11.1805
130	0.204068	State 3: Second fracture	11.6105
131	0.213691	State 3: Second fracture	12.0406
132	0.223343	State 3: Second fracture	12.4706
133	0.233016	State 3: Second fracture	12.9006
134	0.242704	State 3: Second fracture	13.3306
135	0.252398	State 3: Second fracture	13.7606
136	0.262092	State 3: Second fracture	14.1907
137	0.271779	State 3: Second fracture	14.6207
138	0.281453	State 3: Second fracture	15.0507
139	0.291108	State 3: Second fracture	15.4807
140	0.300738	State 3: Second fracture	15.9107
141	0.310339	State 3: Second fracture	16.3408
142	0.319904	State 3: Second fracture	16.7708
143	0.329431	State 3: Second fracture	17.2008
144	0.338913	State 3: Second fracture	17.6308
145	0.348347	State 3: Second fracture	18.0608
146	0.357729	State 3: Second fracture	18.4909
147	0.367056	State 3: Second fracture	18.9209
148	0.376323	State 3: Second fracture	19.3509
149	0.385528	State 3: Second fracture	19.7809
150	0.394668	State 3: Second fracture	20.2109
151	0.40374	State 3: Second fracture	20.641
152	0.412742	State 3: Second fracture	21.071
153	0.42167	State 3: Second fracture	21.501
154	0	State 4: Third & further fracture	0
155	0.031797	State 4: Third & further fracture	0.43002
156	0.0625829	State 4: Third & further fracture	0.86004
157	0.09239	State 4: Third & further fracture	1.29006
158	0.121249	State 4: Third & further fracture	1.72008
159	0.149191	State 4: Third & further fracture	2.1501
160	0.176244	State 4: Third & further fracture	2.58012
161	0.202437	State 4: Third & further fracture	3.01014
162	0.227797	State 4: Third & further fracture	3.44016
163	0.252351	State 4: Third & further fracture	3.87018
164	0.276124	State 4: Third & further fracture	4.3002
165	0.299141	State 4: Third & further fracture	4.73022
166	0.321426	State 4: Third & further fracture	5.16024
167	0.343003	State 4: Third & further fracture	5.59026
168	0.363893	State 4: Third & further fracture	6.02028
169	0.384119	State 4: Third & further fracture	6.4503
170	0.403703	State 4: Third & further fracture	6.88032
171	0.422663	State 4: Third & further fracture	7.31034
172	0.441021	State 4: Third & further fracture	7.74036
173	0.458795	State 4: Third & further fracture	8.17038
174	0.476003	State 4: Third & further fracture	8.6004
175	0.492665	State 4: Third & further fracture	9.03042
176	0.508796	State 4: Third & further fracture	9.46044
177	0.524415	State 4: Third & further fracture	9.89046
178	0.539537	State 4: Third & further fracture	10.3205
179	0.554179	State 4: Third & further fracture	10.7505
180	0.568354	State 4: Third & further fracture	11.1805
181	0.58208	State 4: Third & further fracture	11.6105
182	0.595368	State 4: Third & further fracture	12.0406
183	0.608234	State 4: Third & further fracture	12.4706
184	0.620691	State 4: Third & further fracture	12.9006
185	0.632752	State 4: Third & further fracture	13.3306
186	0.644429	State 4: Third & further fracture	13.7606
187	0.655735	State 4: Third & further fracture	14.1907
188	0.666682	State 4: Third & further fracture	14.6207
189	0.677281	State 4: Third & further fracture	15.0507
190	0.687542	State 4: Third & further fracture	15.4807
191	0.697477	State 4: Third & further fracture	15.9107
192	0.707097	State 4: Third & further fracture	16.3408
193	0.71641	State 4: Third & further fracture	16.7708
194	0.725427	State 4: Third & further fracture	17.2008
195	0.734158	State 4: Third & further fracture	17.6308
196	0.742611	State 4: Third & further fracture	18.0608
197	0.750795	State 4: Third & further fracture	18.4909
198	0.758719	State 4: Third & further fracture	18.9209
199	0.766391	State 4: Third & further fracture	19.3509
200	0.773819	State 4: Third & further fracture	19.7809
201	0.781011	State 4: Third & further fracture	20.2109
202	0.787974	State 4: Third & further fracture	20.641
203	0.794716	State 4: Third & further fracture	21.071
204	0.801243	State 4: Third & further fracture	21.501

## Sheet: Women, Age = 60, T-score = -2.5
	survival.prob	state	times
1	0	State 1: No fracture	0
2	0.00298799	State 1: No fracture	0.43002
3	0.00597676	State 1: No fracture	0.86004
4	0.00896664	State 1: No fracture	1.29006
5	0.011958	State 1: No fracture	1.72008
6	0.0149514	State 1: No fracture	2.1501
7	0.0179475	State 1: No fracture	2.58012
8	0.0209467	State 1: No fracture	3.01014
9	0.0239499	State 1: No fracture	3.44016
10	0.0269579	State 1: No fracture	3.87018
11	0.0299713	State 1: No fracture	4.3002
12	0.0329912	State 1: No fracture	4.73022
13	0.0360182	State 1: No fracture	5.16024
14	0.0390533	State 1: No fracture	5.59026
15	0.0420975	State 1: No fracture	6.02028
16	0.0451515	State 1: No fracture	6.4503
17	0.0482164	State 1: No fracture	6.88032
18	0.051293	State 1: No fracture	7.31034
19	0.0543823	State 1: No fracture	7.74036
20	0.0574852	State 1: No fracture	8.17038
21	0.0606024	State 1: No fracture	8.6004
22	0.063735	State 1: No fracture	9.03042
23	0.0668838	State 1: No fracture	9.46044
24	0.0700496	State 1: No fracture	9.89046
25	0.0732332	State 1: No fracture	10.3205
26	0.0764353	State 1: No fracture	10.7505
27	0.0796569	State 1: No fracture	11.1805
28	0.0828985	State 1: No fracture	11.6105
29	0.0861609	State 1: No fracture	12.0406
30	0.0894447	State 1: No fracture	12.4706
31	0.0927506	State 1: No fracture	12.9006
32	0.0960792	State 1: No fracture	13.3306
33	0.099431	State 1: No fracture	13.7606
34	0.102806	State 1: No fracture	14.1907
35	0.106206	State 1: No fracture	14.6207
36	0.109631	State 1: No fracture	15.0507
37	0.11308	State 1: No fracture	15.4807
38	0.116555	State 1: No fracture	15.9107
39	0.120056	State 1: No fracture	16.3408
40	0.123583	State 1: No fracture	16.7708
41	0.127136	State 1: No fracture	17.2008
42	0.130716	State 1: No fracture	17.6308
43	0.134323	State 1: No fracture	18.0608
44	0.137956	State 1: No fracture	18.4909
45	0.141617	State 1: No fracture	18.9209
46	0.145305	State 1: No fracture	19.3509
47	0.14902	State 1: No fracture	19.7809
48	0.152762	State 1: No fracture	20.2109
49	0.156531	State 1: No fracture	20.641
50	0.160328	State 1: No fracture	21.071
51	0.164151	State 1: No fracture	21.501
52	0	State 2: Initial fracture	0
53	0.00371202	State 2: Initial fracture	0.43002
54	0.00744462	State 2: Initial fracture	0.86004
55	0.0112062	State 2: Initial fracture	1.29006
56	0.0150044	State 2: Initial fracture	1.72008
57	0.0188462	State 2: Initial fracture	2.1501
58	0.0227377	State 2: Initial fracture	2.58012
59	0.0266846	State 2: Initial fracture	3.01014
60	0.0306919	State 2: Initial fracture	3.44016
61	0.0347639	State 2: Initial fracture	3.87018
62	0.0389045	State 2: Initial fracture	4.3002
63	0.0431172	State 2: Initial fracture	4.73022
64	0.0474047	State 2: Initial fracture	5.16024
65	0.0517697	State 2: Initial fracture	5.59026
66	0.056214	State 2: Initial fracture	6.02028
67	0.0607394	State 2: Initial fracture	6.4503
68	0.0653471	State 2: Initial fracture	6.88032
69	0.0700381	State 2: Initial fracture	7.31034
70	0.074813	State 2: Initial fracture	7.74036
71	0.0796721	State 2: Initial fracture	8.17038
72	0.0846154	State 2: Initial fracture	8.6004
73	0.0896427	State 2: Initial fracture	9.03042
74	0.0947536	State 2: Initial fracture	9.46044
75	0.0999473	State 2: Initial fracture	9.89046
76	0.105223	State 2: Initial fracture	10.3205
77	0.11058	State 2: Initial fracture	10.7505
78	0.116016	State 2: Initial fracture	11.1805
79	0.121531	State 2: Initial fracture	11.6105
80	0.127122	State 2: Initial fracture	12.0406
81	0.132789	State 2: Initial fracture	12.4706
82	0.138528	State 2: Initial fracture	12.9006
83	0.144339	State 2: Initial fracture	13.3306
84	0.15022	State 2: Initial fracture	13.7606
85	0.156167	State 2: Initial fracture	14.1907
86	0.16218	State 2: Initial fracture	14.6207
87	0.168255	State 2: Initial fracture	15.0507
88	0.174391	State 2: Initial fracture	15.4807
89	0.180585	State 2: Initial fracture	15.9107
90	0.186834	State 2: Initial fracture	16.3408
91	0.193137	State 2: Initial fracture	16.7708
92	0.199491	State 2: Initial fracture	17.2008
93	0.205893	State 2: Initial fracture	17.6308
94	0.21234	State 2: Initial fracture	18.0608
95	0.218831	State 2: Initial fracture	18.4909
96	0.225363	State 2: Initial fracture	18.9209
97	0.231933	State 2: Initial fracture	19.3509
98	0.238538	State 2: Initial fracture	19.7809
99	0.245176	State 2: Initial fracture	20.2109
100	0.251845	State 2: Initial fracture	20.641
101	0.258542	State 2: Initial fracture	21.071
102	0.265265	State 2: Initial fracture	21.501
103	0	State 3: Second fracture	0
104	0.00510278	State 3: Second fracture	0.43002
105	0.0106391	State 3: Second fracture	0.86004
106	0.0165822	State 3: Second fracture	1.29006
107	0.0229065	State 3: Second fracture	1.72008
108	0.0295876	State 3: Second fracture	2.1501
109	0.0366019	State 3: Second fracture	2.58012
110	0.043927	State 3: Second fracture	3.01014
111	0.0515414	State 3: Second fracture	3.44016
112	0.0594246	State 3: Second fracture	3.87018
113	0.0675567	State 3: Second fracture	4.3002
114	0.0759191	State 3: Second fracture	4.73022
115	0.0844937	State 3: Second fracture	5.16024
116	0.0932632	State 3: Second fracture	5.59026
117	0.102211	State 3: Second fracture	6.02028
118	0.111322	State 3: Second fracture	6.4503
119	0.120581	State 3: Second fracture	6.88032
120	0.129974	State 3: Second fracture	7.31034
121	0.139486	State 3: Second fracture	7.74036
122	0.149105	State 3: Second fracture	8.17038
123	0.158819	State 3: Second fracture	8.6004
124	0.168615	State 3: Second fracture	9.03042
125	0.178483	State 3: Second fracture	9.46044
126	0.188412	State 3: Second fracture	9.89046
127	0.198391	State 3: Second fracture	10.3205
128	0.208411	State 3: Second fracture	10.7505
129	0.218462	State 3: Second fracture	11.1805
130	0.228536	State 3: Second fracture	11.6105
131	0.238625	State 3: Second fracture	12.0406
132	0.248721	State 3: Second fracture	12.4706
133	0.258816	State 3: Second fracture	12.9006
134	0.268902	State 3: Second fracture	13.3306
135	0.278975	State 3: Second fracture	13.7606
136	0.289026	State 3: Second fracture	14.1907
137	0.29905	State 3: Second fracture	14.6207
138	0.309042	State 3: Second fracture	15.0507
139	0.318996	State 3: Second fracture	15.4807
140	0.328907	State 3: Second fracture	15.9107
141	0.338771	State 3: Second fracture	16.3408
142	0.348582	State 3: Second fracture	16.7708
143	0.358337	State 3: Second fracture	17.2008
144	0.368032	State 3: Second fracture	17.6308
145	0.377662	State 3: Second fracture	18.0608
146	0.387226	State 3: Second fracture	18.4909
147	0.396719	State 3: Second fracture	18.9209
148	0.406138	State 3: Second fracture	19.3509
149	0.415482	State 3: Second fracture	19.7809
150	0.424746	State 3: Second fracture	20.2109
151	0.433929	State 3: Second fracture	20.641
152	0.443028	State 3: Second fracture	21.071
153	0.452042	State 3: Second fracture	21.501
154	0	State 4: Third & further fracture	0
155	0.0245827	State 4: Third & further fracture	0.43002
156	0.0485612	State 4: Third & further fracture	0.86004
157	0.0719501	State 4: Third & further fracture	1.29006
158	0.0947641	State 4: Third & further fracture	1.72008
159	0.117017	State 4: Third & further fracture	2.1501
160	0.138723	State 4: Third & further fracture	2.58012
161	0.159896	State 4: Third & further fracture	3.01014
162	0.180548	State 4: Third & further fracture	3.44016
163	0.200692	State 4: Third & further fracture	3.87018
164	0.220342	State 4: Third & further fracture	4.3002
165	0.239508	State 4: Third & further fracture	4.73022
166	0.258203	State 4: Third & further fracture	5.16024
167	0.276438	State 4: Third & further fracture	5.59026
168	0.294225	State 4: Third & further fracture	6.02028
169	0.311575	State 4: Third & further fracture	6.4503
170	0.328498	State 4: Third & further fracture	6.88032
171	0.345006	State 4: Third & further fracture	7.31034
172	0.361107	State 4: Third & further fracture	7.74036
173	0.376813	State 4: Third & further fracture	8.17038
174	0.392133	State 4: Third & further fracture	8.6004
175	0.407076	State 4: Third & further fracture	9.03042
176	0.421651	State 4: Third & further fracture	9.46044
177	0.435869	State 4: Third & further fracture	9.89046
178	0.449737	State 4: Third & further fracture	10.3205
179	0.463264	State 4: Third & further fracture	10.7505
180	0.476458	State 4: Third & further fracture	11.1805
181	0.489328	State 4: Third & further fracture	11.6105
182	0.501882	State 4: Third & further fracture	12.0406
183	0.514127	State 4: Third & further fracture	12.4706
184	0.526071	State 4: Third & further fracture	12.9006
185	0.537722	State 4: Third & further fracture	13.3306
186	0.549086	State 4: Third & further fracture	13.7606
187	0.56017	State 4: Third & further fracture	14.1907
188	0.570983	State 4: Third & further fracture	14.6207
189	0.581529	State 4: Third & further fracture	15.0507
190	0.591816	State 4: Third & further fracture	15.4807
191	0.60185	State 4: Third & further fracture	15.9107
192	0.611638	State 4: Third & further fracture	16.3408
193	0.621185	State 4: Third & further fracture	16.7708
194	0.630497	State 4: Third & further fracture	17.2008
195	0.639581	State 4: Third & further fracture	17.6308
196	0.648441	State 4: Third & further fracture	18.0608
197	0.657083	State 4: Third & further fracture	18.4909
198	0.665513	State 4: Third & further fracture	18.9209
199	0.673736	State 4: Third & further fracture	19.3509
200	0.681756	State 4: Third & further fracture	19.7809
201	0.689579	State 4: Third & further fracture	20.2109
202	0.69721	State 4: Third & further fracture	20.641
203	0.704654	State 4: Third & further fracture	21.071
204	0.711914	State 4: Third & further fracture	21.501

## Sheet: Women, Age = 70, T-score = 0
	survival.prob	state	times
1	0	State 1: No fracture	0
2	0.00713485	State 1: No fracture	0.43002
3	0.0142188	State 1: No fracture	0.86004
4	0.0212521	State 1: No fracture	1.29006
5	0.0282354	State 1: No fracture	1.72008
6	0.0351692	State 1: No fracture	2.1501
7	0.042054	State 1: No fracture	2.58012
8	0.0488905	State 1: No fracture	3.01014
9	0.0556793	State 1: No fracture	3.44016
10	0.0624213	State 1: No fracture	3.87018
11	0.069117	State 1: No fracture	4.3002
12	0.0757674	State 1: No fracture	4.73022
13	0.0823731	State 1: No fracture	5.16024
14	0.0889349	State 1: No fracture	5.59026
15	0.0954536	State 1: No fracture	6.02028
16	0.10193	State 1: No fracture	6.4503
17	0.108365	State 1: No fracture	6.88032
18	0.114759	State 1: No fracture	7.31034
19	0.121113	State 1: No fracture	7.74036
20	0.127428	State 1: No fracture	8.17038
21	0.133704	State 1: No fracture	8.6004
22	0.139942	State 1: No fracture	9.03042
23	0.146144	State 1: No fracture	9.46044
24	0.152309	State 1: No fracture	9.89046
25	0.158438	State 1: No fracture	10.3205
26	0.164532	State 1: No fracture	10.7505
27	0.170591	State 1: No fracture	11.1805
28	0.176617	State 1: No fracture	11.6105
29	0.182609	State 1: No fracture	12.0406
30	0.188568	State 1: No fracture	12.4706
31	0.194496	State 1: No fracture	12.9006
32	0.200391	State 1: No fracture	13.3306
33	0.206255	State 1: No fracture	13.7606
34	0.212089	State 1: No fracture	14.1907
35	0.217892	State 1: No fracture	14.6207
36	0.223665	State 1: No fracture	15.0507
37	0.229409	State 1: No fracture	15.4807
38	0.235123	State 1: No fracture	15.9107
39	0.240809	State 1: No fracture	16.3408
40	0.246466	State 1: No fracture	16.7708
41	0.252096	State 1: No fracture	17.2008
42	0.257697	State 1: No fracture	17.6308
43	0.263271	State 1: No fracture	18.0608
44	0.268818	State 1: No fracture	18.4909
45	0.274338	State 1: No fracture	18.9209
46	0.279831	State 1: No fracture	19.3509
47	0.285298	State 1: No fracture	19.7809
48	0.290738	State 1: No fracture	20.2109
49	0.296152	State 1: No fracture	20.641
50	0.30154	State 1: No fracture	21.071
51	0.306903	State 1: No fracture	21.501
52	0	State 2: Initial fracture	0
53	0.00713487	State 2: Initial fracture	0.43002
54	0.0142146	State 2: Initial fracture	0.86004
55	0.0212541	State 2: Initial fracture	1.29006
56	0.0282664	State 2: Initial fracture	1.72008
57	0.0352628	State 2: Initial fracture	2.1501
58	0.042253	State 2: Initial fracture	2.58012
59	0.0492457	State 2: Initial fracture	3.01014
60	0.0562478	State 2: Initial fracture	3.44016
61	0.0632656	State 2: Initial fracture	3.87018
62	0.0703041	State 2: Initial fracture	4.3002
63	0.0773673	State 2: Initial fracture	4.73022
64	0.0844586	State 2: Initial fracture	5.16024
65	0.0915805	State 2: Initial fracture	5.59026
66	0.098735	State 2: Initial fracture	6.02028
67	0.105923	State 2: Initial fracture	6.4503
68	0.113146	State 2: Initial fracture	6.88032
69	0.120404	State 2: Initial fracture	7.31034
70	0.127697	State 2: Initial fracture	7.74036
71	0.135023	State 2: Initial fracture	8.17038
72	0.142384	State 2: Initial fracture	8.6004
73	0.149776	State 2: Initial fracture	9.03042
74	0.1572	State 2: Initial fracture	9.46044
75	0.164652	State 2: Initial fracture	9.89046
76	0.172133	State 2: Initial fracture	10.3205
77	0.179639	State 2: Initial fracture	10.7505
78	0.187169	State 2: Initial fracture	11.1805
79	0.19472	State 2: Initial fracture	11.6105
80	0.20229	State 2: Initial fracture	12.0406
81	0.209878	State 2: Initial fracture	12.4706
82	0.217479	State 2: Initial fracture	12.9006
83	0.225093	State 2: Initial fracture	13.3306
84	0.232717	State 2: Initial fracture	13.7606
85	0.240347	State 2: Initial fracture	14.1907
86	0.247982	State 2: Initial fracture	14.6207
87	0.255619	State 2: Initial fracture	15.0507
88	0.263256	State 2: Initial fracture	15.4807
89	0.270891	State 2: Initial fracture	15.9107
90	0.27852	State 2: Initial fracture	16.3408
91	0.286141	State 2: Initial fracture	16.7708
92	0.293753	State 2: Initial fracture	17.2008
93	0.301352	State 2: Initial fracture	17.6308
94	0.308938	State 2: Initial fracture	18.0608
95	0.316506	State 2: Initial fracture	18.4909
96	0.324056	State 2: Initial fracture	18.9209
97	0.331585	State 2: Initial fracture	19.3509
98	0.339091	State 2: Initial fracture	19.7809
99	0.346572	State 2: Initial fracture	20.2109
100	0.354027	State 2: Initial fracture	20.641
101	0.361453	State 2: Initial fracture	21.071
102	0.368848	State 2: Initial fracture	21.501
103	0	State 3: Second fracture	0
104	0.00616695	State 3: Second fracture	0.43002
105	0.0135182	State 3: Second fracture	0.86004
106	0.021922	State 3: Second fracture	1.29006
107	0.0312577	State 3: Second fracture	1.72008
108	0.041415	State 3: Second fracture	2.1501
109	0.0522933	State 3: Second fracture	2.58012
110	0.0638007	State 3: Second fracture	3.01014
111	0.0758534	State 3: Second fracture	3.44016
112	0.088375	State 3: Second fracture	3.87018
113	0.101296	State 3: Second fracture	4.3002
114	0.114552	State 3: Second fracture	4.73022
115	0.128087	State 3: Second fracture	5.16024
116	0.141848	State 3: Second fracture	5.59026
117	0.155786	State 3: Second fracture	6.02028
118	0.16986	State 3: Second fracture	6.4503
119	0.18403	State 3: Second fracture	6.88032
120	0.198261	State 3: Second fracture	7.31034
121	0.212521	State 3: Second fracture	7.74036
122	0.226781	State 3: Second fracture	8.17038
123	0.241015	State 3: Second fracture	8.6004
124	0.2552	State 3: Second fracture	9.03042
125	0.269316	State 3: Second fracture	9.46044
126	0.283343	State 3: Second fracture	9.89046
127	0.297265	State 3: Second fracture	10.3205
128	0.311068	State 3: Second fracture	10.7505
129	0.324737	State 3: Second fracture	11.1805
130	0.338263	State 3: Second fracture	11.6105
131	0.351634	State 3: Second fracture	12.0406
132	0.364842	State 3: Second fracture	12.4706
133	0.37788	State 3: Second fracture	12.9006
134	0.39074	State 3: Second fracture	13.3306
135	0.403417	State 3: Second fracture	13.7606
136	0.415907	State 3: Second fracture	14.1907
137	0.428206	State 3: Second fracture	14.6207
138	0.44031	State 3: Second fracture	15.0507
139	0.452217	State 3: Second fracture	15.4807
140	0.463925	State 3: Second fracture	15.9107
141	0.475433	State 3: Second fracture	16.3408
142	0.48674	State 3: Second fracture	16.7708
143	0.497845	State 3: Second fracture	17.2008
144	0.508749	State 3: Second fracture	17.6308
145	0.519453	State 3: Second fracture	18.0608
146	0.529956	State 3: Second fracture	18.4909
147	0.540259	State 3: Second fracture	18.9209
148	0.550365	State 3: Second fracture	19.3509
149	0.560274	State 3: Second fracture	19.7809
150	0.569989	State 3: Second fracture	20.2109
151	0.57951	State 3: Second fracture	20.641
152	0.588841	State 3: Second fracture	21.071
153	0.597983	State 3: Second fracture	21.501
154	0	State 4: Third & further fracture	0
155	0.0789535	State 4: Third & further fracture	0.43002
156	0.151673	State 4: Third & further fracture	0.86004
157	0.218652	State 4: Third & further fracture	1.29006
158	0.280342	State 4: Third & further fracture	1.72008
159	0.337161	State 4: Third & further fracture	2.1501
160	0.389495	State 4: Third & further fracture	2.58012
161	0.437696	State 4: Third & further fracture	3.01014
162	0.482092	State 4: Third & further fracture	3.44016
163	0.522983	State 4: Third & further fracture	3.87018
164	0.560645	State 4: Third & further fracture	4.3002
165	0.595334	State 4: Third & further fracture	4.73022
166	0.627284	State 4: Third & further fracture	5.16024
167	0.656711	State 4: Third & further fracture	5.59026
168	0.683815	State 4: Third & further fracture	6.02028
169	0.708779	State 4: Third & further fracture	6.4503
170	0.731772	State 4: Third & further fracture	6.88032
171	0.752949	State 4: Third & further fracture	7.31034
172	0.772455	State 4: Third & further fracture	7.74036
173	0.79042	State 4: Third & further fracture	8.17038
174	0.806967	State 4: Third & further fracture	8.6004
175	0.822208	State 4: Third & further fracture	9.03042
176	0.836245	State 4: Third & further fracture	9.46044
177	0.849174	State 4: Third & further fracture	9.89046
178	0.861082	State 4: Third & further fracture	10.3205
179	0.87205	State 4: Third & further fracture	10.7505
180	0.882153	State 4: Third & further fracture	11.1805
181	0.891457	State 4: Third & further fracture	11.6105
182	0.900027	State 4: Third & further fracture	12.0406
183	0.90792	State 4: Third & further fracture	12.4706
184	0.91519	State 4: Third & further fracture	12.9006
185	0.921886	State 4: Third & further fracture	13.3306
186	0.928054	State 4: Third & further fracture	13.7606
187	0.933734	State 4: Third & further fracture	14.1907
188	0.938966	State 4: Third & further fracture	14.6207
189	0.943785	State 4: Third & further fracture	15.0507
190	0.948223	State 4: Third & further fracture	15.4807
191	0.952311	State 4: Third & further fracture	15.9107
192	0.956076	State 4: Third & further fracture	16.3408
193	0.959544	State 4: Third & further fracture	16.7708
194	0.962738	State 4: Third & further fracture	17.2008
195	0.96568	State 4: Third & further fracture	17.6308
196	0.96839	State 4: Third & further fracture	18.0608
197	0.970886	State 4: Third & further fracture	18.4909
198	0.973184	State 4: Third & further fracture	18.9209
199	0.975302	State 4: Third & further fracture	19.3509
200	0.977252	State 4: Third & further fracture	19.7809
201	0.979048	State 4: Third & further fracture	20.2109
202	0.980702	State 4: Third & further fracture	20.641
203	0.982226	State 4: Third & further fracture	21.071
204	0.983629	State 4: Third & further fracture	21.501

## Sheet: Men, Age = 70, T-score = 0
	survival.prob	state	times
1	0	State 1: No fracture	0
2	0.0128578	State 1: No fracture	0.43002
3	0.0255675	State 1: No fracture	0.86004
4	0.0381316	State 1: No fracture	1.29006
5	0.0505526	State 1: No fracture	1.72008
6	0.062833	State 1: No fracture	2.1501
7	0.0749754	State 1: No fracture	2.58012
8	0.0869821	State 1: No fracture	3.01014
9	0.0988554	State 1: No fracture	3.44016
10	0.110597	State 1: No fracture	3.87018
11	0.12221	State 1: No fracture	4.3002
12	0.133696	State 1: No fracture	4.73022
13	0.145056	State 1: No fracture	5.16024
14	0.156293	State 1: No fracture	5.59026
15	0.167407	State 1: No fracture	6.02028
16	0.178401	State 1: No fracture	6.4503
17	0.189276	State 1: No fracture	6.88032
18	0.200033	State 1: No fracture	7.31034
19	0.210674	State 1: No fracture	7.74036
20	0.221199	State 1: No fracture	8.17038
21	0.23161	State 1: No fracture	8.6004
22	0.241907	State 1: No fracture	9.03042
23	0.252093	State 1: No fracture	9.46044
24	0.262167	State 1: No fracture	9.89046
25	0.272131	State 1: No fracture	10.3205
26	0.281986	State 1: No fracture	10.7505
27	0.291732	State 1: No fracture	11.1805
28	0.301371	State 1: No fracture	11.6105
29	0.310902	State 1: No fracture	12.0406
30	0.320327	State 1: No fracture	12.4706
31	0.329647	State 1: No fracture	12.9006
32	0.338862	State 1: No fracture	13.3306
33	0.347973	State 1: No fracture	13.7606
34	0.356981	State 1: No fracture	14.1907
35	0.365886	State 1: No fracture	14.6207
36	0.37469	State 1: No fracture	15.0507
37	0.383392	State 1: No fracture	15.4807
38	0.391993	State 1: No fracture	15.9107
39	0.400495	State 1: No fracture	16.3408
40	0.408897	State 1: No fracture	16.7708
41	0.417201	State 1: No fracture	17.2008
42	0.425407	State 1: No fracture	17.6308
43	0.433516	State 1: No fracture	18.0608
44	0.441529	State 1: No fracture	18.4909
45	0.449445	State 1: No fracture	18.9209
46	0.457267	State 1: No fracture	19.3509
47	0.464994	State 1: No fracture	19.7809
48	0.472628	State 1: No fracture	20.2109
49	0.480168	State 1: No fracture	20.641
50	0.487616	State 1: No fracture	21.071
51	0.494973	State 1: No fracture	21.501
52	0	State 2: Initial fracture	0
53	0.0171566	State 2: Initial fracture	0.43002
54	0.0343156	State 2: Initial fracture	0.86004
55	0.0515	State 2: Initial fracture	1.29006
56	0.0687189	State 2: Initial fracture	1.72008
57	0.085971	State 2: Initial fracture	2.1501
58	0.103248	State 2: Initial fracture	2.58012
59	0.120536	State 2: Initial fracture	3.01014
60	0.137819	State 2: Initial fracture	3.44016
61	0.155076	State 2: Initial fracture	3.87018
62	0.172288	State 2: Initial fracture	4.3002
63	0.189434	State 2: Initial fracture	4.73022
64	0.206494	State 2: Initial fracture	5.16024
65	0.223447	State 2: Initial fracture	5.59026
66	0.240275	State 2: Initial fracture	6.02028
67	0.256959	State 2: Initial fracture	6.4503
68	0.273484	State 2: Initial fracture	6.88032
69	0.289833	State 2: Initial fracture	7.31034
70	0.305994	State 2: Initial fracture	7.74036
71	0.321952	State 2: Initial fracture	8.17038
72	0.337698	State 2: Initial fracture	8.6004
73	0.353222	State 2: Initial fracture	9.03042
74	0.368513	State 2: Initial fracture	9.46044
75	0.383566	State 2: Initial fracture	9.89046
76	0.398373	State 2: Initial fracture	10.3205
77	0.412929	State 2: Initial fracture	10.7505
78	0.427229	State 2: Initial fracture	11.1805
79	0.441271	State 2: Initial fracture	11.6105
80	0.455051	State 2: Initial fracture	12.0406
81	0.468568	State 2: Initial fracture	12.4706
82	0.481819	State 2: Initial fracture	12.9006
83	0.494806	State 2: Initial fracture	13.3306
84	0.507527	State 2: Initial fracture	13.7606
85	0.519983	State 2: Initial fracture	14.1907
86	0.532176	State 2: Initial fracture	14.6207
87	0.544106	State 2: Initial fracture	15.0507
88	0.555775	State 2: Initial fracture	15.4807
89	0.567186	State 2: Initial fracture	15.9107
90	0.578341	State 2: Initial fracture	16.3408
91	0.589243	State 2: Initial fracture	16.7708
92	0.599894	State 2: Initial fracture	17.2008
93	0.610299	State 2: Initial fracture	17.6308
94	0.62046	State 2: Initial fracture	18.0608
95	0.630381	State 2: Initial fracture	18.4909
96	0.640066	State 2: Initial fracture	18.9209
97	0.649518	State 2: Initial fracture	19.3509
98	0.658742	State 2: Initial fracture	19.7809
99	0.66774	State 2: Initial fracture	20.2109
100	0.676519	State 2: Initial fracture	20.641
101	0.685081	State 2: Initial fracture	21.071
102	0.69343	State 2: Initial fracture	21.501
103	0	State 3: Second fracture	0
104	0.0436407	State 3: Second fracture	0.43002
105	0.0902316	State 3: Second fracture	0.86004
106	0.138334	State 3: Second fracture	1.29006
107	0.186855	State 3: Second fracture	1.72008
108	0.234972	State 3: Second fracture	2.1501
109	0.282081	State 3: Second fracture	2.58012
110	0.327745	State 3: Second fracture	3.01014
111	0.371661	State 3: Second fracture	3.44016
112	0.413626	State 3: Second fracture	3.87018
113	0.453522	State 3: Second fracture	4.3002
114	0.491289	State 3: Second fracture	4.73022
115	0.526913	State 3: Second fracture	5.16024
116	0.560416	State 3: Second fracture	5.59026
117	0.591847	State 3: Second fracture	6.02028
118	0.621271	State 3: Second fracture	6.4503
119	0.648766	State 3: Second fracture	6.88032
120	0.67442	State 3: Second fracture	7.31034
121	0.698325	State 3: Second fracture	7.74036
122	0.720574	State 3: Second fracture	8.17038
123	0.741263	State 3: Second fracture	8.6004
124	0.760484	State 3: Second fracture	9.03042
125	0.77833	State 3: Second fracture	9.46044
126	0.794888	State 3: Second fracture	9.89046
127	0.810243	State 3: Second fracture	10.3205
128	0.824475	State 3: Second fracture	10.7505
129	0.837662	State 3: Second fracture	11.1805
130	0.849875	State 3: Second fracture	11.6105
131	0.861184	State 3: Second fracture	12.0406
132	0.871652	State 3: Second fracture	12.4706
133	0.881341	State 3: Second fracture	12.9006
134	0.890305	State 3: Second fracture	13.3306
135	0.898598	State 3: Second fracture	13.7606
136	0.906269	State 3: Second fracture	14.1907
137	0.913363	State 3: Second fracture	14.6207
138	0.919924	State 3: Second fracture	15.0507
139	0.92599	State 3: Second fracture	15.4807
140	0.931599	State 3: Second fracture	15.9107
141	0.936784	State 3: Second fracture	16.3408
142	0.941578	State 3: Second fracture	16.7708
143	0.946009	State 3: Second fracture	17.2008
144	0.950105	State 3: Second fracture	17.6308
145	0.953891	State 3: Second fracture	18.0608
146	0.95739	State 3: Second fracture	18.4909
147	0.960624	State 3: Second fracture	18.9209
148	0.963613	State 3: Second fracture	19.3509
149	0.966375	State 3: Second fracture	19.7809
150	0.968928	State 3: Second fracture	20.2109
151	0.971288	State 3: Second fracture	20.641
152	0.973468	State 3: Second fracture	21.071
153	0.975483	State 3: Second fracture	21.501
154	0	State 4: Third & further fracture	0
155	0.193797	State 4: Third & further fracture	0.43002
156	0.350037	State 4: Third & further fracture	0.86004
157	0.475998	State 4: Third & further fracture	1.29006
158	0.577549	State 4: Third & further fracture	1.72008
159	0.659419	State 4: Third & further fracture	2.1501
160	0.725422	State 4: Third & further fracture	2.58012
161	0.778635	State 4: Third & further fracture	3.01014
162	0.821535	State 4: Third & further fracture	3.44016
163	0.856121	State 4: Third & further fracture	3.87018
164	0.884004	State 4: Third & further fracture	4.3002
165	0.906484	State 4: Third & further fracture	4.73022
166	0.924607	State 4: Third & further fracture	5.16024
167	0.939218	State 4: Third & further fracture	5.59026
168	0.950997	State 4: Third & further fracture	6.02028
169	0.960494	State 4: Third & further fracture	6.4503
170	0.96815	State 4: Third & further fracture	6.88032
171	0.974323	State 4: Third & further fracture	7.31034
172	0.979299	State 4: Third & further fracture	7.74036
173	0.983311	State 4: Third & further fracture	8.17038
174	0.986545	State 4: Third & further fracture	8.6004
175	0.989153	State 4: Third & further fracture	9.03042
176	0.991255	State 4: Third & further fracture	9.46044
177	0.99295	State 4: Third & further fracture	9.89046
178	0.994316	State 4: Third & further fracture	10.3205
179	0.995417	State 4: Third & further fracture	10.7505
180	0.996306	State 4: Third & further fracture	11.1805
181	0.997022	State 4: Third & further fracture	11.6105
182	0.997599	State 4: Third & further fracture	12.0406
183	0.998064	State 4: Third & further fracture	12.4706
184	0.998439	State 4: Third & further fracture	12.9006
185	0.998742	State 4: Third & further fracture	13.3306
186	0.998986	State 4: Third & further fracture	13.7606
187	0.999182	State 4: Third & further fracture	14.1907
188	0.999341	State 4: Third & further fracture	14.6207
189	0.999468	State 4: Third & further fracture	15.0507
190	0.999571	State 4: Third & further fracture	15.4807
191	0.999655	State 4: Third & further fracture	15.9107
192	0.999721	State 4: Third & further fracture	16.3408
193	0.999775	State 4: Third & further fracture	16.7708
194	0.999819	State 4: Third & further fracture	17.2008
195	0.999854	State 4: Third & further fracture	17.6308
196	0.999882	State 4: Third & further fracture	18.0608
197	0.999905	State 4: Third & further fracture	18.4909
198	0.999924	State 4: Third & further fracture	18.9209
199	0.999938	State 4: Third & further fracture	19.3509
200	0.99995	State 4: Third & further fracture	19.7809
201	0.99996	State 4: Third & further fracture	20.2109
202	0.999968	State 4: Third & further fracture	20.641
203	0.999974	State 4: Third & further fracture	21.071
204	0.999979	State 4: Third & further fracture	21.501

## Sheet: Women, Age = 70, T-score = -1.5
	survival.prob	state	times
1	0	State 1: No fracture	0
2	0.00761853	State 1: No fracture	0.43002
3	0.0151941	State 1: No fracture	0.86004
4	0.0227271	State 1: No fracture	1.29006
5	0.0302181	State 1: No fracture	1.72008
6	0.0376681	State 1: No fracture	2.1501
7	0.045078	State 1: No fracture	2.58012
8	0.052449	State 1: No fracture	3.01014
9	0.0597821	State 1: No fracture	3.44016
10	0.0670788	State 1: No fracture	3.87018
11	0.0743403	State 1: No fracture	4.3002
12	0.0815681	State 1: No fracture	4.73022
13	0.0887634	State 1: No fracture	5.16024
14	0.0959278	State 1: No fracture	5.59026
15	0.103063	State 1: No fracture	6.02028
16	0.110169	State 1: No fracture	6.4503
17	0.117249	State 1: No fracture	6.88032
18	0.124303	State 1: No fracture	7.31034
19	0.131333	State 1: No fracture	7.74036
20	0.138339	State 1: No fracture	8.17038
21	0.145324	State 1: No fracture	8.6004
22	0.152287	State 1: No fracture	9.03042
23	0.159231	State 1: No fracture	9.46044
24	0.166155	State 1: No fracture	9.89046
25	0.173062	State 1: No fracture	10.3205
26	0.179951	State 1: No fracture	10.7505
27	0.186823	State 1: No fracture	11.1805
28	0.19368	State 1: No fracture	11.6105
29	0.200521	State 1: No fracture	12.0406
30	0.207348	State 1: No fracture	12.4706
31	0.214159	State 1: No fracture	12.9006
32	0.220957	State 1: No fracture	13.3306
33	0.227741	State 1: No fracture	13.7606
34	0.234512	State 1: No fracture	14.1907
35	0.241269	State 1: No fracture	14.6207
36	0.248013	State 1: No fracture	15.0507
37	0.254743	State 1: No fracture	15.4807
38	0.261461	State 1: No fracture	15.9107
39	0.268165	State 1: No fracture	16.3408
40	0.274855	State 1: No fracture	16.7708
41	0.281532	State 1: No fracture	17.2008
42	0.288195	State 1: No fracture	17.6308
43	0.294844	State 1: No fracture	18.0608
44	0.301478	State 1: No fracture	18.4909
45	0.308098	State 1: No fracture	18.9209
46	0.314702	State 1: No fracture	19.3509
47	0.321291	State 1: No fracture	19.7809
48	0.327863	State 1: No fracture	20.2109
49	0.334419	State 1: No fracture	20.641
50	0.340958	State 1: No fracture	21.071
51	0.347479	State 1: No fracture	21.501
52	0	State 2: Initial fracture	0
53	0.00892179	State 2: Initial fracture	0.43002
54	0.0177983	State 2: Initial fracture	0.86004
55	0.0266509	State 2: Initial fracture	1.29006
56	0.0354983	State 2: Initial fracture	1.72008
57	0.0443566	State 2: Initial fracture	2.1501
58	0.0532393	State 2: Initial fracture	2.58012
59	0.0621579	State 2: Initial fracture	3.01014
60	0.0711218	State 2: Initial fracture	3.44016
61	0.0801387	State 2: Initial fracture	3.87018
62	0.0892146	State 2: Initial fracture	4.3002
63	0.0983541	State 2: Initial fracture	4.73022
64	0.10756	State 2: Initial fracture	5.16024
65	0.116836	State 2: Initial fracture	5.59026
66	0.126181	State 2: Initial fracture	6.02028
67	0.135595	State 2: Initial fracture	6.4503
68	0.145079	State 2: Initial fracture	6.88032
69	0.15463	State 2: Initial fracture	7.31034
70	0.164247	State 2: Initial fracture	7.74036
71	0.173925	State 2: Initial fracture	8.17038
72	0.183663	State 2: Initial fracture	8.6004
73	0.193456	State 2: Initial fracture	9.03042
74	0.2033	State 2: Initial fracture	9.46044
75	0.21319	State 2: Initial fracture	9.89046
76	0.223123	State 2: Initial fracture	10.3205
77	0.233092	State 2: Initial fracture	10.7505
78	0.243093	State 2: Initial fracture	11.1805
79	0.253121	State 2: Initial fracture	11.6105
80	0.26317	State 2: Initial fracture	12.0406
81	0.273235	State 2: Initial fracture	12.4706
82	0.28331	State 2: Initial fracture	12.9006
83	0.293391	State 2: Initial fracture	13.3306
84	0.303472	State 2: Initial fracture	13.7606
85	0.313547	State 2: Initial fracture	14.1907
86	0.323611	State 2: Initial fracture	14.6207
87	0.333659	State 2: Initial fracture	15.0507
88	0.343686	State 2: Initial fracture	15.4807
89	0.353686	State 2: Initial fracture	15.9107
90	0.363656	State 2: Initial fracture	16.3408
91	0.37359	State 2: Initial fracture	16.7708
92	0.383484	State 2: Initial fracture	17.2008
93	0.393333	State 2: Initial fracture	17.6308
94	0.403133	State 2: Initial fracture	18.0608
95	0.41288	State 2: Initial fracture	18.4909
96	0.422569	State 2: Initial fracture	18.9209
97	0.432198	State 2: Initial fracture	19.3509
98	0.441761	State 2: Initial fracture	19.7809
99	0.451257	State 2: Initial fracture	20.2109
100	0.460681	State 2: Initial fracture	20.641
101	0.47003	State 2: Initial fracture	21.071
102	0.479301	State 2: Initial fracture	21.501
103	0	State 3: Second fracture	0
104	0.0100167	State 3: Second fracture	0.43002
105	0.021075	State 3: Second fracture	0.86004
106	0.0330617	State 3: Second fracture	1.29006
107	0.0458717	State 3: Second fracture	1.72008
108	0.0594077	State 3: Second fracture	2.1501
109	0.0735793	State 3: Second fracture	2.58012
110	0.0883031	State 3: Second fracture	3.01014
111	0.103502	State 3: Second fracture	3.44016
112	0.119104	State 3: Second fracture	3.87018
113	0.135044	State 3: Second fracture	4.3002
114	0.151261	State 3: Second fracture	4.73022
115	0.167699	State 3: Second fracture	5.16024
116	0.184307	State 3: Second fracture	5.59026
117	0.201037	State 3: Second fracture	6.02028
118	0.217846	State 3: Second fracture	6.4503
119	0.234695	State 3: Second fracture	6.88032
120	0.251547	State 3: Second fracture	7.31034
121	0.26837	State 3: Second fracture	7.74036
122	0.285132	State 3: Second fracture	8.17038
123	0.301808	State 3: Second fracture	8.6004
124	0.318371	State 3: Second fracture	9.03042
125	0.334801	State 3: Second fracture	9.46044
126	0.351076	State 3: Second fracture	9.89046
127	0.367179	State 3: Second fracture	10.3205
128	0.383093	State 3: Second fracture	10.7505
129	0.398805	State 3: Second fracture	11.1805
130	0.414301	State 3: Second fracture	11.6105
131	0.42957	State 3: Second fracture	12.0406
132	0.444604	State 3: Second fracture	12.4706
133	0.459392	State 3: Second fracture	12.9006
134	0.473929	State 3: Second fracture	13.3306
135	0.488207	State 3: Second fracture	13.7606
136	0.502223	State 3: Second fracture	14.1907
137	0.515972	State 3: Second fracture	14.6207
138	0.52945	State 3: Second fracture	15.0507
139	0.542656	State 3: Second fracture	15.4807
140	0.555587	State 3: Second fracture	15.9107
141	0.568243	State 3: Second fracture	16.3408
142	0.580624	State 3: Second fracture	16.7708
143	0.592729	State 3: Second fracture	17.2008
144	0.60456	State 3: Second fracture	17.6308
145	0.616117	State 3: Second fracture	18.0608
146	0.627402	State 3: Second fracture	18.4909
147	0.638417	State 3: Second fracture	18.9209
148	0.649165	State 3: Second fracture	19.3509
149	0.659648	State 3: Second fracture	19.7809
150	0.669869	State 3: Second fracture	20.2109
151	0.679832	State 3: Second fracture	20.641
152	0.689539	State 3: Second fracture	21.071
153	0.698995	State 3: Second fracture	21.501
154	0	State 4: Third & further fracture	0
155	0.0540818	State 4: Third & further fracture	0.43002
156	0.105239	State 4: Third & further fracture	0.86004
157	0.153629	State 4: Third & further fracture	1.29006
158	0.199402	State 4: Third & further fracture	1.72008
159	0.2427	State 4: Third & further fracture	2.1501
160	0.283656	State 4: Third & further fracture	2.58012
161	0.322397	State 4: Third & further fracture	3.01014
162	0.359043	State 4: Third & further fracture	3.44016
163	0.393707	State 4: Third & further fracture	3.87018
164	0.426497	State 4: Third & further fracture	4.3002
165	0.457513	State 4: Third & further fracture	4.73022
166	0.486851	State 4: Third & further fracture	5.16024
167	0.514603	State 4: Third & further fracture	5.59026
168	0.540855	State 4: Third & further fracture	6.02028
169	0.565686	State 4: Third & further fracture	6.4503
170	0.589174	State 4: Third & further fracture	6.88032
171	0.611393	State 4: Third & further fracture	7.31034
172	0.632409	State 4: Third & further fracture	7.74036
173	0.652289	State 4: Third & further fracture	8.17038
174	0.671094	State 4: Third & further fracture	8.6004
175	0.688882	State 4: Third & further fracture	9.03042
176	0.705708	State 4: Third & further fracture	9.46044
177	0.721623	State 4: Third & further fracture	9.89046
178	0.736679	State 4: Third & further fracture	10.3205
179	0.750919	State 4: Third & further fracture	10.7505
180	0.76439	State 4: Third & further fracture	11.1805
181	0.777132	State 4: Third & further fracture	11.6105
182	0.789185	State 4: Third & further fracture	12.0406
183	0.800587	State 4: Third & further fracture	12.4706
184	0.811371	State 4: Third & further fracture	12.9006
185	0.821573	State 4: Third & further fracture	13.3306
186	0.831222	State 4: Third & further fracture	13.7606
187	0.84035	State 4: Third & further fracture	14.1907
188	0.848984	State 4: Third & further fracture	14.6207
189	0.857152	State 4: Third & further fracture	15.0507
190	0.864877	State 4: Third & further fracture	15.4807
191	0.872185	State 4: Third & further fracture	15.9107
192	0.879097	State 4: Third & further fracture	16.3408
193	0.885636	State 4: Third & further fracture	16.7708
194	0.891821	State 4: Third & further fracture	17.2008
195	0.897671	State 4: Third & further fracture	17.6308
196	0.903205	State 4: Third & further fracture	18.0608
197	0.90844	State 4: Third & further fracture	18.4909
198	0.913392	State 4: Third & further fracture	18.9209
199	0.918076	State 4: Third & further fracture	19.3509
200	0.922507	State 4: Third & further fracture	19.7809
201	0.926698	State 4: Third & further fracture	20.2109
202	0.930662	State 4: Third & further fracture	20.641
203	0.934412	State 4: Third & further fracture	21.071
204	0.937959	State 4: Third & further fracture	21.501

## Sheet: Women, Age = 70, T-score = -2.5
	survival.prob	state	times
1	0	State 1: No fracture	0
2	0.00796688	State 1: No fracture	0.43002
3	0.0159127	State 1: No fracture	0.86004
4	0.0238383	State 1: No fracture	1.29006
5	0.0317448	State 1: No fracture	1.72008
6	0.0396336	State 1: No fracture	2.1501
7	0.0475063	State 1: No fracture	2.58012
8	0.0553645	State 1: No fracture	3.01014
9	0.0632101	State 1: No fracture	3.44016
10	0.0710448	State 1: No fracture	3.87018
11	0.0788704	State 1: No fracture	4.3002
12	0.0866888	State 1: No fracture	4.73022
13	0.0945016	State 1: No fracture	5.16024
14	0.102311	State 1: No fracture	5.59026
15	0.110117	State 1: No fracture	6.02028
16	0.117923	State 1: No fracture	6.4503
17	0.12573	State 1: No fracture	6.88032
18	0.133538	State 1: No fracture	7.31034
19	0.141349	State 1: No fracture	7.74036
20	0.149165	State 1: No fracture	8.17038
21	0.156984	State 1: No fracture	8.6004
22	0.16481	State 1: No fracture	9.03042
23	0.172641	State 1: No fracture	9.46044
24	0.180478	State 1: No fracture	9.89046
25	0.188322	State 1: No fracture	10.3205
26	0.196173	State 1: No fracture	10.7505
27	0.20403	State 1: No fracture	11.1805
28	0.211893	State 1: No fracture	11.6105
29	0.219762	State 1: No fracture	12.0406
30	0.227638	State 1: No fracture	12.4706
31	0.235518	State 1: No fracture	12.9006
32	0.243402	State 1: No fracture	13.3306
33	0.25129	State 1: No fracture	13.7606
34	0.259181	State 1: No fracture	14.1907
35	0.267073	State 1: No fracture	14.6207
36	0.274966	State 1: No fracture	15.0507
37	0.282858	State 1: No fracture	15.4807
38	0.290749	State 1: No fracture	15.9107
39	0.298636	State 1: No fracture	16.3408
40	0.306519	State 1: No fracture	16.7708
41	0.314396	State 1: No fracture	17.2008
42	0.322265	State 1: No fracture	17.6308
43	0.330125	State 1: No fracture	18.0608
44	0.337975	State 1: No fracture	18.4909
45	0.345813	State 1: No fracture	18.9209
46	0.353637	State 1: No fracture	19.3509
47	0.361445	State 1: No fracture	19.7809
48	0.369236	State 1: No fracture	20.2109
49	0.377008	State 1: No fracture	20.641
50	0.38476	State 1: No fracture	21.071
51	0.392489	State 1: No fracture	21.501
52	0	State 2: Initial fracture	0
53	0.0103789	State 2: Initial fracture	0.43002
54	0.0207657	State 2: Initial fracture	0.86004
55	0.031181	State 2: Initial fracture	1.29006
56	0.0416415	State 2: Initial fracture	1.72008
57	0.0521608	State 2: Initial fracture	2.1501
58	0.06275	State 2: Initial fracture	2.58012
59	0.0734172	State 2: Initial fracture	3.01014
60	0.0841685	State 2: Initial fracture	3.44016
61	0.0950078	State 2: Initial fracture	3.87018
62	0.105937	State 2: Initial fracture	4.3002
63	0.116958	State 2: Initial fracture	4.73022
64	0.128068	State 2: Initial fracture	5.16024
65	0.139265	State 2: Initial fracture	5.59026
66	0.150548	State 2: Initial fracture	6.02028
67	0.16191	State 2: Initial fracture	6.4503
68	0.173348	State 2: Initial fracture	6.88032
69	0.184855	State 2: Initial fracture	7.31034
70	0.196426	State 2: Initial fracture	7.74036
71	0.208054	State 2: Initial fracture	8.17038
72	0.219731	State 2: Initial fracture	8.6004
73	0.23145	State 2: Initial fracture	9.03042
74	0.243203	State 2: Initial fracture	9.46044
75	0.254983	State 2: Initial fracture	9.89046
76	0.266782	State 2: Initial fracture	10.3205
77	0.278591	State 2: Initial fracture	10.7505
78	0.290403	State 2: Initial fracture	11.1805
79	0.30221	State 2: Initial fracture	11.6105
80	0.314004	State 2: Initial fracture	12.0406
81	0.325776	State 2: Initial fracture	12.4706
82	0.337521	State 2: Initial fracture	12.9006
83	0.349229	State 2: Initial fracture	13.3306
84	0.360895	State 2: Initial fracture	13.7606
85	0.37251	State 2: Initial fracture	14.1907
86	0.384068	State 2: Initial fracture	14.6207
87	0.395562	State 2: Initial fracture	15.0507
88	0.406987	State 2: Initial fracture	15.4807
89	0.418336	State 2: Initial fracture	15.9107
90	0.429603	State 2: Initial fracture	16.3408
91	0.440782	State 2: Initial fracture	16.7708
92	0.451869	State 2: Initial fracture	17.2008
93	0.462859	State 2: Initial fracture	17.6308
94	0.473746	State 2: Initial fracture	18.0608
95	0.484527	State 2: Initial fracture	18.4909
96	0.495196	State 2: Initial fracture	18.9209
97	0.505751	State 2: Initial fracture	19.3509
98	0.516188	State 2: Initial fracture	19.7809
99	0.526502	State 2: Initial fracture	20.2109
100	0.536692	State 2: Initial fracture	20.641
101	0.546755	State 2: Initial fracture	21.071
102	0.556686	State 2: Initial fracture	21.501
103	0	State 3: Second fracture	0
104	0.0139444	State 3: Second fracture	0.43002
105	0.0286583	State 3: Second fracture	0.86004
106	0.0440438	State 3: Second fracture	1.29006
107	0.0600104	State 3: Second fracture	1.72008
108	0.0764744	State 3: Second fracture	2.1501
109	0.0933585	State 3: Second fracture	2.58012
110	0.110591	State 3: Second fracture	3.01014
111	0.128107	State 3: Second fracture	3.44016
112	0.145846	State 3: Second fracture	3.87018
113	0.163751	State 3: Second fracture	4.3002
114	0.181772	State 3: Second fracture	4.73022
115	0.199862	State 3: Second fracture	5.16024
116	0.217978	State 3: Second fracture	5.59026
117	0.236081	State 3: Second fracture	6.02028
118	0.254136	State 3: Second fracture	6.4503
119	0.27211	State 3: Second fracture	6.88032
120	0.289974	State 3: Second fracture	7.31034
121	0.307702	State 3: Second fracture	7.74036
122	0.325268	State 3: Second fracture	8.17038
123	0.342653	State 3: Second fracture	8.6004
124	0.359837	State 3: Second fracture	9.03042
125	0.376802	State 3: Second fracture	9.46044
126	0.393533	State 3: Second fracture	9.89046
127	0.410018	State 3: Second fracture	10.3205
128	0.426245	State 3: Second fracture	10.7505
129	0.442203	State 3: Second fracture	11.1805
130	0.457883	State 3: Second fracture	11.6105
131	0.473279	State 3: Second fracture	12.0406
132	0.488385	State 3: Second fracture	12.4706
133	0.503195	State 3: Second fracture	12.9006
134	0.517705	State 3: Second fracture	13.3306
135	0.531913	State 3: Second fracture	13.7606
136	0.545815	State 3: Second fracture	14.1907
137	0.559412	State 3: Second fracture	14.6207
138	0.572703	State 3: Second fracture	15.0507
139	0.585687	State 3: Second fracture	15.4807
140	0.598365	State 3: Second fracture	15.9107
141	0.610738	State 3: Second fracture	16.3408
142	0.622809	State 3: Second fracture	16.7708
143	0.63458	State 3: Second fracture	17.2008
144	0.646052	State 3: Second fracture	17.6308
145	0.65723	State 3: Second fracture	18.0608
146	0.668117	State 3: Second fracture	18.4909
147	0.678715	State 3: Second fracture	18.9209
148	0.68903	State 3: Second fracture	19.3509
149	0.699065	State 3: Second fracture	19.7809
150	0.708824	State 3: Second fracture	20.2109
151	0.718313	State 3: Second fracture	20.641
152	0.727535	State 3: Second fracture	21.071
153	0.736496	State 3: Second fracture	21.501
154	0	State 4: Third & further fracture	0
155	0.041922	State 4: Third & further fracture	0.43002
156	0.0820865	State 4: Third & further fracture	0.86004
157	0.120567	State 4: Third & further fracture	1.29006
158	0.157435	State 4: Third & further fracture	1.72008
159	0.192757	State 4: Third & further fracture	2.1501
160	0.226598	State 4: Third & further fracture	2.58012
161	0.259021	State 4: Third & further fracture	3.01014
162	0.290084	State 4: Third & further fracture	3.44016
163	0.319845	State 4: Third & further fracture	3.87018
164	0.348358	State 4: Third & further fracture	4.3002
165	0.375677	State 4: Third & further fracture	4.73022
166	0.401849	State 4: Third & further fracture	5.16024
167	0.426925	State 4: Third & further fracture	5.59026
168	0.45095	State 4: Third & further fracture	6.02028
169	0.473967	State 4: Third & further fracture	6.4503
170	0.496019	State 4: Third & further fracture	6.88032
171	0.517147	State 4: Third & further fracture	7.31034
172	0.537389	State 4: Third & further fracture	7.74036
173	0.556783	State 4: Third & further fracture	8.17038
174	0.575363	State 4: Third & further fracture	8.6004
175	0.593165	State 4: Third & further fracture	9.03042
176	0.61022	State 4: Third & further fracture	9.46044
177	0.626561	State 4: Third & further fracture	9.89046
178	0.642216	State 4: Third & further fracture	10.3205
179	0.657215	State 4: Third & further fracture	10.7505
180	0.671585	State 4: Third & further fracture	11.1805
181	0.685353	State 4: Third & further fracture	11.6105
182	0.698544	State 4: Third & further fracture	12.0406
183	0.711181	State 4: Third & further fracture	12.4706
184	0.723289	State 4: Third & further fracture	12.9006
185	0.734889	State 4: Third & further fracture	13.3306
186	0.746003	State 4: Third & further fracture	13.7606
187	0.756651	State 4: Third & further fracture	14.1907
188	0.766853	State 4: Third & further fracture	14.6207
189	0.776627	State 4: Third & further fracture	15.0507
190	0.785991	State 4: Third & further fracture	15.4807
191	0.794963	State 4: Third & further fracture	15.9107
192	0.803558	State 4: Third & further fracture	16.3408
193	0.811794	State 4: Third & further fracture	16.7708
194	0.819684	State 4: Third & further fracture	17.2008
195	0.827243	State 4: Third & further fracture	17.6308
196	0.834485	State 4: Third & further fracture	18.0608
197	0.841424	State 4: Third & further fracture	18.4909
198	0.848072	State 4: Third & further fracture	18.9209
199	0.854441	State 4: Third & further fracture	19.3509
200	0.860543	State 4: Third & further fracture	19.7809
201	0.866389	State 4: Third & further fracture	20.2109
202	0.871991	State 4: Third & further fracture	20.641
203	0.877357	State 4: Third & further fracture	21.071
204	0.882498	State 4: Third & further fracture	21.501

## Sheet: Women, Age = 80, T-score = 0
	survival.prob	state	times
1	0	State 1: No fracture	0
2	0.0189418	State 1: No fracture	0.43002
3	0.037532	State 1: No fracture	0.86004
4	0.0557769	State 1: No fracture	1.29006
5	0.073683	State 1: No fracture	1.72008
6	0.091257	State 1: No fracture	2.1501
7	0.108505	State 1: No fracture	2.58012
8	0.125435	State 1: No fracture	3.01014
9	0.142053	State 1: No fracture	3.44016
10	0.158365	State 1: No fracture	3.87018
11	0.174379	State 1: No fracture	4.3002
12	0.1901	State 1: No fracture	4.73022
13	0.205534	State 1: No fracture	5.16024
14	0.220689	State 1: No fracture	5.59026
15	0.235569	State 1: No fracture	6.02028
16	0.250181	State 1: No fracture	6.4503
17	0.264531	State 1: No fracture	6.88032
18	0.278623	State 1: No fracture	7.31034
19	0.292463	State 1: No fracture	7.74036
20	0.306056	State 1: No fracture	8.17038
21	0.319408	State 1: No fracture	8.6004
22	0.332523	State 1: No fracture	9.03042
23	0.345405	State 1: No fracture	9.46044
24	0.35806	State 1: No fracture	9.89046
25	0.370491	State 1: No fracture	10.3205
26	0.382703	State 1: No fracture	10.7505
27	0.3947	State 1: No fracture	11.1805
28	0.406486	State 1: No fracture	11.6105
29	0.418064	State 1: No fracture	12.0406
30	0.429439	State 1: No fracture	12.4706
31	0.440614	State 1: No fracture	12.9006
32	0.451593	State 1: No fracture	13.3306
33	0.462378	State 1: No fracture	13.7606
34	0.472974	State 1: No fracture	14.1907
35	0.483384	State 1: No fracture	14.6207
36	0.49361	State 1: No fracture	15.0507
37	0.503655	State 1: No fracture	15.4807
38	0.513524	State 1: No fracture	15.9107
39	0.523218	State 1: No fracture	16.3408
40	0.53274	State 1: No fracture	16.7708
41	0.542094	State 1: No fracture	17.2008
42	0.551281	State 1: No fracture	17.6308
43	0.560305	State 1: No fracture	18.0608
44	0.569168	State 1: No fracture	18.4909
45	0.577873	State 1: No fracture	18.9209
46	0.586422	State 1: No fracture	19.3509
47	0.594817	State 1: No fracture	19.7809
48	0.603062	State 1: No fracture	20.2109
49	0.611158	State 1: No fracture	20.641
50	0.619107	State 1: No fracture	21.071
51	0.626912	State 1: No fracture	21.501
52	0	State 2: Initial fracture	0
53	0.0198572	State 2: Initial fracture	0.43002
54	0.039293	State 2: Initial fracture	0.86004
55	0.0583597	State 2: Initial fracture	1.29006
56	0.0770999	State 2: Initial fracture	1.72008
57	0.0955475	State 2: Initial fracture	2.1501
58	0.11373	State 2: Initial fracture	2.58012
59	0.131667	State 2: Initial fracture	3.01014
60	0.149376	State 2: Initial fracture	3.44016
61	0.16687	State 2: Initial fracture	3.87018
62	0.184155	State 2: Initial fracture	4.3002
63	0.201239	State 2: Initial fracture	4.73022
64	0.218126	State 2: Initial fracture	5.16024
65	0.234816	State 2: Initial fracture	5.59026
66	0.25131	State 2: Initial fracture	6.02028
67	0.267609	State 2: Initial fracture	6.4503
68	0.28371	State 2: Initial fracture	6.88032
69	0.29961	State 2: Initial fracture	7.31034
70	0.315309	State 2: Initial fracture	7.74036
71	0.330802	State 2: Initial fracture	8.17038
72	0.346086	State 2: Initial fracture	8.6004
73	0.36116	State 2: Initial fracture	9.03042
74	0.376018	State 2: Initial fracture	9.46044
75	0.39066	State 2: Initial fracture	9.89046
76	0.405081	State 2: Initial fracture	10.3205
77	0.41928	State 2: Initial fracture	10.7505
78	0.433253	State 2: Initial fracture	11.1805
79	0.447	State 2: Initial fracture	11.6105
80	0.460517	State 2: Initial fracture	12.0406
81	0.473804	State 2: Initial fracture	12.4706
82	0.48686	State 2: Initial fracture	12.9006
83	0.499683	State 2: Initial fracture	13.3306
84	0.512273	State 2: Initial fracture	13.7606
85	0.524629	State 2: Initial fracture	14.1907
86	0.536752	State 2: Initial fracture	14.6207
87	0.548642	State 2: Initial fracture	15.0507
88	0.560298	State 2: Initial fracture	15.4807
89	0.571723	State 2: Initial fracture	15.9107
90	0.582916	State 2: Initial fracture	16.3408
91	0.593879	State 2: Initial fracture	16.7708
92	0.604614	State 2: Initial fracture	17.2008
93	0.615122	State 2: Initial fracture	17.6308
94	0.625404	State 2: Initial fracture	18.0608
95	0.635463	State 2: Initial fracture	18.4909
96	0.645301	State 2: Initial fracture	18.9209
97	0.65492	State 2: Initial fracture	19.3509
98	0.664323	State 2: Initial fracture	19.7809
99	0.673511	State 2: Initial fracture	20.2109
100	0.682488	State 2: Initial fracture	20.641
101	0.691257	State 2: Initial fracture	21.071
102	0.69982	State 2: Initial fracture	21.501
103	0	State 3: Second fracture	0
104	0.0167703	State 3: Second fracture	0.43002
105	0.0360301	State 3: Second fracture	0.86004
106	0.0572589	State 3: Second fracture	1.29006
107	0.0800128	State 3: Second fracture	1.72008
108	0.103914	State 3: Second fracture	2.1501
109	0.128641	State 3: Second fracture	2.58012
110	0.153924	State 3: Second fracture	3.01014
111	0.179532	State 3: Second fracture	3.44016
112	0.205273	State 3: Second fracture	3.87018
113	0.230987	State 3: Second fracture	4.3002
114	0.256539	State 3: Second fracture	4.73022
115	0.281819	State 3: Second fracture	5.16024
116	0.306737	State 3: Second fracture	5.59026
117	0.331218	State 3: Second fracture	6.02028
118	0.355203	State 3: Second fracture	6.4503
119	0.378648	State 3: Second fracture	6.88032
120	0.401515	State 3: Second fracture	7.31034
121	0.423778	State 3: Second fracture	7.74036
122	0.445419	State 3: Second fracture	8.17038
123	0.466425	State 3: Second fracture	8.6004
124	0.486789	State 3: Second fracture	9.03042
125	0.506509	State 3: Second fracture	9.46044
126	0.525587	State 3: Second fracture	9.89046
127	0.544026	State 3: Second fracture	10.3205
128	0.561836	State 3: Second fracture	10.7505
129	0.579024	State 3: Second fracture	11.1805
130	0.595604	State 3: Second fracture	11.6105
131	0.611586	State 3: Second fracture	12.0406
132	0.626986	State 3: Second fracture	12.4706
133	0.641817	State 3: Second fracture	12.9006
134	0.656095	State 3: Second fracture	13.3306
135	0.669836	State 3: Second fracture	13.7606
136	0.683055	State 3: Second fracture	14.1907
137	0.695769	State 3: Second fracture	14.6207
138	0.707993	State 3: Second fracture	15.0507
139	0.719745	State 3: Second fracture	15.4807
140	0.731039	State 3: Second fracture	15.9107
141	0.741891	State 3: Second fracture	16.3408
142	0.752317	State 3: Second fracture	16.7708
143	0.762333	State 3: Second fracture	17.2008
144	0.771952	State 3: Second fracture	17.6308
145	0.781189	State 3: Second fracture	18.0608
146	0.790059	State 3: Second fracture	18.4909
147	0.798575	State 3: Second fracture	18.9209
148	0.806751	State 3: Second fracture	19.3509
149	0.814599	State 3: Second fracture	19.7809
150	0.822132	State 3: Second fracture	20.2109
151	0.829362	State 3: Second fracture	20.641
152	0.836302	State 3: Second fracture	21.071
153	0.842961	State 3: Second fracture	21.501
154	0	State 4: Third & further fracture	0
155	0.131955	State 4: Third & further fracture	0.43002
156	0.246498	State 4: Third & further fracture	0.86004
157	0.345926	State 4: Third & further fracture	1.29006
158	0.432235	State 4: Third & further fracture	1.72008
159	0.507154	State 4: Third & further fracture	2.1501
160	0.572188	State 4: Third & further fracture	2.58012
161	0.62864	State 4: Third & further fracture	3.01014
162	0.677643	State 4: Third & further fracture	3.44016
163	0.720179	State 4: Third & further fracture	3.87018
164	0.757103	State 4: Third & further fracture	4.3002
165	0.789155	State 4: Third & further fracture	4.73022
166	0.816977	State 4: Third & further fracture	5.16024
167	0.841128	State 4: Third & further fracture	5.59026
168	0.862092	State 4: Third & further fracture	6.02028
169	0.880289	State 4: Third & further fracture	6.4503
170	0.896086	State 4: Third & further fracture	6.88032
171	0.909798	State 4: Third & further fracture	7.31034
172	0.9217	State 4: Third & further fracture	7.74036
173	0.932032	State 4: Third & further fracture	8.17038
174	0.941001	State 4: Third & further fracture	8.6004
175	0.948786	State 4: Third & further fracture	9.03042
176	0.955544	State 4: Third & further fracture	9.46044
177	0.96141	State 4: Third & further fracture	9.89046
178	0.966502	State 4: Third & further fracture	10.3205
179	0.970923	State 4: Third & further fracture	10.7505
180	0.97476	State 4: Third & further fracture	11.1805
181	0.97809	State 4: Third & further fracture	11.6105
182	0.980981	State 4: Third & further fracture	12.0406
183	0.983491	State 4: Third & further fracture	12.4706
184	0.985669	State 4: Third & further fracture	12.9006
185	0.98756	State 4: Third & further fracture	13.3306
186	0.989202	State 4: Third & further fracture	13.7606
187	0.990627	State 4: Third & further fracture	14.1907
188	0.991864	State 4: Third & further fracture	14.6207
189	0.992937	State 4: Third & further fracture	15.0507
190	0.993869	State 4: Third & further fracture	15.4807
191	0.994678	State 4: Third & further fracture	15.9107
192	0.99538	State 4: Third & further fracture	16.3408
193	0.99599	State 4: Third & further fracture	16.7708
194	0.996519	State 4: Third & further fracture	17.2008
195	0.996978	State 4: Third & further fracture	17.6308
196	0.997377	State 4: Third & further fracture	18.0608
197	0.997723	State 4: Third & further fracture	18.4909
198	0.998024	State 4: Third & further fracture	18.9209
199	0.998284	State 4: Third & further fracture	19.3509
200	0.998511	State 4: Third & further fracture	19.7809
201	0.998707	State 4: Third & further fracture	20.2109
202	0.998878	State 4: Third & further fracture	20.641
203	0.999026	State 4: Third & further fracture	21.071
204	0.999155	State 4: Third & further fracture	21.501

## Sheet: Women, Age = 80, T-score = -1.5
	survival.prob	state	times
1	0	State 1: No fracture	0
2	0.0202287	State 1: No fracture	0.43002
3	0.0401168	State 1: No fracture	0.86004
4	0.0596689	State 1: No fracture	1.29006
5	0.0788905	State 1: No fracture	1.72008
6	0.0977875	State 1: No fracture	2.1501
7	0.116366	State 1: No fracture	2.58012
8	0.134633	State 1: No fracture	3.01014
9	0.152594	State 1: No fracture	3.44016
10	0.170256	State 1: No fracture	3.87018
11	0.187626	State 1: No fracture	4.3002
12	0.204709	State 1: No fracture	4.73022
13	0.221511	State 1: No fracture	5.16024
14	0.238038	State 1: No fracture	5.59026
15	0.254295	State 1: No fracture	6.02028
16	0.270288	State 1: No fracture	6.4503
17	0.28602	State 1: No fracture	6.88032
18	0.301497	State 1: No fracture	7.31034
19	0.316722	State 1: No fracture	7.74036
20	0.3317	State 1: No fracture	8.17038
21	0.346434	State 1: No fracture	8.6004
22	0.360928	State 1: No fracture	9.03042
23	0.375184	State 1: No fracture	9.46044
24	0.389206	State 1: No fracture	9.89046
25	0.402996	State 1: No fracture	10.3205
26	0.416557	State 1: No fracture	10.7505
27	0.429892	State 1: No fracture	11.1805
28	0.443002	State 1: No fracture	11.6105
29	0.45589	State 1: No fracture	12.0406
30	0.468557	State 1: No fracture	12.4706
31	0.481007	State 1: No fracture	12.9006
32	0.49324	State 1: No fracture	13.3306
33	0.505258	State 1: No fracture	13.7606
34	0.517063	State 1: No fracture	14.1907
35	0.528658	State 1: No fracture	14.6207
36	0.540043	State 1: No fracture	15.0507
37	0.55122	State 1: No fracture	15.4807
38	0.562191	State 1: No fracture	15.9107
39	0.572958	State 1: No fracture	16.3408
40	0.583522	State 1: No fracture	16.7708
41	0.593885	State 1: No fracture	17.2008
42	0.604049	State 1: No fracture	17.6308
43	0.614016	State 1: No fracture	18.0608
44	0.623786	State 1: No fracture	18.4909
45	0.633363	State 1: No fracture	18.9209
46	0.642748	State 1: No fracture	19.3509
47	0.651942	State 1: No fracture	19.7809
48	0.660949	State 1: No fracture	20.2109
49	0.669769	State 1: No fracture	20.641
50	0.678404	State 1: No fracture	21.071
51	0.686858	State 1: No fracture	21.501
52	0	State 2: Initial fracture	0
53	0.0248052	State 2: Initial fracture	0.43002
54	0.0490944	State 2: Initial fracture	0.86004
55	0.072934	State 2: Initial fracture	1.29006
56	0.0963762	State 2: Initial fracture	1.72008
57	0.119461	State 2: Initial fracture	2.1501
58	0.142219	State 2: Initial fracture	2.58012
59	0.164671	State 2: Initial fracture	3.01014
60	0.186833	State 2: Initial fracture	3.44016
61	0.208712	State 2: Initial fracture	3.87018
62	0.230315	State 2: Initial fracture	4.3002
63	0.25164	State 2: Initial fracture	4.73022
64	0.272685	State 2: Initial fracture	5.16024
65	0.293447	State 2: Initial fracture	5.59026
66	0.313918	State 2: Initial fracture	6.02028
67	0.334092	State 2: Initial fracture	6.4503
68	0.35396	State 2: Initial fracture	6.88032
69	0.373513	State 2: Initial fracture	7.31034
70	0.392743	State 2: Initial fracture	7.74036
71	0.411641	State 2: Initial fracture	8.17038
72	0.4302	State 2: Initial fracture	8.6004
73	0.44841	State 2: Initial fracture	9.03042
74	0.466265	State 2: Initial fracture	9.46044
75	0.483759	State 2: Initial fracture	9.89046
76	0.500886	State 2: Initial fracture	10.3205
77	0.51764	State 2: Initial fracture	10.7505
78	0.534018	State 2: Initial fracture	11.1805
79	0.550016	State 2: Initial fracture	11.6105
80	0.565631	State 2: Initial fracture	12.0406
81	0.580863	State 2: Initial fracture	12.4706
82	0.59571	State 2: Initial fracture	12.9006
83	0.610172	State 2: Initial fracture	13.3306
84	0.624249	State 2: Initial fracture	13.7606
85	0.637944	State 2: Initial fracture	14.1907
86	0.651257	State 2: Initial fracture	14.6207
87	0.664192	State 2: Initial fracture	15.0507
88	0.676752	State 2: Initial fracture	15.4807
89	0.688941	State 2: Initial fracture	15.9107
90	0.700763	State 2: Initial fracture	16.3408
91	0.712222	State 2: Initial fracture	16.7708
92	0.723324	State 2: Initial fracture	17.2008
93	0.734075	State 2: Initial fracture	17.6308
94	0.744479	State 2: Initial fracture	18.0608
95	0.754545	State 2: Initial fracture	18.4909
96	0.764276	State 2: Initial fracture	18.9209
97	0.773682	State 2: Initial fracture	19.3509
98	0.782768	State 2: Initial fracture	19.7809
99	0.791541	State 2: Initial fracture	20.2109
100	0.800009	State 2: Initial fracture	20.641
101	0.808178	State 2: Initial fracture	21.071
102	0.816057	State 2: Initial fracture	21.501
103	0	State 3: Second fracture	0
104	0.0272014	State 3: Second fracture	0.43002
105	0.0560481	State 3: Second fracture	0.86004
106	0.086124	State 3: Second fracture	1.29006
107	0.117068	State 3: Second fracture	1.72008
108	0.148568	State 3: Second fracture	2.1501
109	0.180356	State 3: Second fracture	2.58012
110	0.212202	State 3: Second fracture	3.01014
111	0.243909	State 3: Second fracture	3.44016
112	0.275313	State 3: Second fracture	3.87018
113	0.306273	State 3: Second fracture	4.3002
114	0.336675	State 3: Second fracture	4.73022
115	0.366422	State 3: Second fracture	5.16024
116	0.395439	State 3: Second fracture	5.59026
117	0.423664	State 3: Second fracture	6.02028
118	0.45105	State 3: Second fracture	6.4503
119	0.477561	State 3: Second fracture	6.88032
120	0.503172	State 3: Second fracture	7.31034
121	0.527869	State 3: Second fracture	7.74036
122	0.551642	State 3: Second fracture	8.17038
123	0.57449	State 3: Second fracture	8.6004
124	0.596417	State 3: Second fracture	9.03042
125	0.617433	State 3: Second fracture	9.46044
126	0.63755	State 3: Second fracture	9.89046
127	0.656784	State 3: Second fracture	10.3205
128	0.675156	State 3: Second fracture	10.7505
129	0.692685	State 3: Second fracture	11.1805
130	0.709395	State 3: Second fracture	11.6105
131	0.725311	State 3: Second fracture	12.0406
132	0.740458	State 3: Second fracture	12.4706
133	0.754862	State 3: Second fracture	12.9006
134	0.76855	State 3: Second fracture	13.3306
135	0.781548	State 3: Second fracture	13.7606
136	0.793883	State 3: Second fracture	14.1907
137	0.805583	State 3: Second fracture	14.6207
138	0.816673	State 3: Second fracture	15.0507
139	0.82718	State 3: Second fracture	15.4807
140	0.837129	State 3: Second fracture	15.9107
141	0.846545	State 3: Second fracture	16.3408
142	0.855453	State 3: Second fracture	16.7708
143	0.863877	State 3: Second fracture	17.2008
144	0.871839	State 3: Second fracture	17.6308
145	0.879362	State 3: Second fracture	18.0608
146	0.886467	State 3: Second fracture	18.4909
147	0.893176	State 3: Second fracture	18.9209
148	0.899507	State 3: Second fracture	19.3509
149	0.905481	State 3: Second fracture	19.7809
150	0.911116	State 3: Second fracture	20.2109
151	0.91643	State 3: Second fracture	20.641
152	0.921439	State 3: Second fracture	21.071
153	0.926159	State 3: Second fracture	21.501
154	0	State 4: Third & further fracture	0
155	0.0912315	State 4: Third & further fracture	0.43002
156	0.17414	State 4: Third & further fracture	0.86004
157	0.249484	State 4: Third & further fracture	1.29006
158	0.317955	State 4: Third & further fracture	1.72008
159	0.380179	State 4: Third & further fracture	2.1501
160	0.436726	State 4: Third & further fracture	2.58012
161	0.488115	State 4: Third & further fracture	3.01014
162	0.534815	State 4: Third & further fracture	3.44016
163	0.577254	State 4: Third & further fracture	3.87018
164	0.615822	State 4: Third & further fracture	4.3002
165	0.650871	State 4: Third & further fracture	4.73022
166	0.682723	State 4: Third & further fracture	5.16024
167	0.711668	State 4: Third & further fracture	5.59026
168	0.737973	State 4: Third & further fracture	6.02028
169	0.761878	State 4: Third & further fracture	6.4503
170	0.783603	State 4: Third & further fracture	6.88032
171	0.803345	State 4: Third & further fracture	7.31034
172	0.821286	State 4: Third & further fracture	7.74036
173	0.83759	State 4: Third & further fracture	8.17038
174	0.852407	State 4: Third & further fracture	8.6004
175	0.865872	State 4: Third & further fracture	9.03042
176	0.878109	State 4: Third & further fracture	9.46044
177	0.889229	State 4: Third & further fracture	9.89046
178	0.899335	State 4: Third & further fracture	10.3205
179	0.908519	State 4: Third & further fracture	10.7505
180	0.916865	State 4: Third & further fracture	11.1805
181	0.924449	State 4: Third & further fracture	11.6105
182	0.931342	State 4: Third & further fracture	12.0406
183	0.937606	State 4: Third & further fracture	12.4706
184	0.943298	State 4: Third & further fracture	12.9006
185	0.948471	State 4: Third & further fracture	13.3306
186	0.953172	State 4: Third & further fracture	13.7606
187	0.957444	State 4: Third & further fracture	14.1907
188	0.961327	State 4: Third & further fracture	14.6207
189	0.964855	State 4: Third & further fracture	15.0507
190	0.968061	State 4: Third & further fracture	15.4807
191	0.970975	State 4: Third & further fracture	15.9107
192	0.973623	State 4: Third & further fracture	16.3408
193	0.97603	State 4: Third & further fracture	16.7708
194	0.978216	State 4: Third & further fracture	17.2008
195	0.980204	State 4: Third & further fracture	17.6308
196	0.98201	State 4: Third & further fracture	18.0608
197	0.983651	State 4: Third & further fracture	18.4909
198	0.985143	State 4: Third & further fracture	18.9209
199	0.986498	State 4: Third & further fracture	19.3509
200	0.98773	State 4: Third & further fracture	19.7809
201	0.988849	State 4: Third & further fracture	20.2109
202	0.989867	State 4: Third & further fracture	20.641
203	0.990791	State 4: Third & further fracture	21.071
204	0.991631	State 4: Third & further fracture	21.501

## Sheet: Women, Age = 80, T-score = -2.5
	survival.prob	state	times
1	0	State 1: No fracture	0
2	0.0211648	State 1: No fracture	0.43002
3	0.0420567	State 1: No fracture	0.86004
4	0.0626776	State 1: No fracture	1.29006
5	0.0830297	State 1: No fracture	1.72008
6	0.103116	State 1: No fracture	2.1501
7	0.122938	State 1: No fracture	2.58012
8	0.1425	State 1: No fracture	3.01014
9	0.161804	State 1: No fracture	3.44016
10	0.180851	State 1: No fracture	3.87018
11	0.199645	State 1: No fracture	4.3002
12	0.218185	State 1: No fracture	4.73022
13	0.236475	State 1: No fracture	5.16024
14	0.254513	State 1: No fracture	5.59026
15	0.272301	State 1: No fracture	6.02028
16	0.28984	State 1: No fracture	6.4503
17	0.307128	State 1: No fracture	6.88032
18	0.324165	State 1: No fracture	7.31034
19	0.340952	State 1: No fracture	7.74036
20	0.357486	State 1: No fracture	8.17038
21	0.373768	State 1: No fracture	8.6004
22	0.389796	State 1: No fracture	9.03042
23	0.405569	State 1: No fracture	9.46044
24	0.421086	State 1: No fracture	9.89046
25	0.436347	State 1: No fracture	10.3205
26	0.451349	State 1: No fracture	10.7505
27	0.466092	State 1: No fracture	11.1805
28	0.480575	State 1: No fracture	11.6105
29	0.494797	State 1: No fracture	12.0406
30	0.508758	State 1: No fracture	12.4706
31	0.522457	State 1: No fracture	12.9006
32	0.535894	State 1: No fracture	13.3306
33	0.549069	State 1: No fracture	13.7606
34	0.561981	State 1: No fracture	14.1907
35	0.574631	State 1: No fracture	14.6207
36	0.587019	State 1: No fracture	15.0507
37	0.599146	State 1: No fracture	15.4807
38	0.611012	State 1: No fracture	15.9107
39	0.62262	State 1: No fracture	16.3408
40	0.633969	State 1: No fracture	16.7708
41	0.645062	State 1: No fracture	17.2008
42	0.6559	State 1: No fracture	17.6308
43	0.666485	State 1: No fracture	18.0608
44	0.676819	State 1: No fracture	18.4909
45	0.686903	State 1: No fracture	18.9209
46	0.696742	State 1: No fracture	19.3509
47	0.706336	State 1: No fracture	19.7809
48	0.715688	State 1: No fracture	20.2109
49	0.724803	State 1: No fracture	20.641
50	0.733681	State 1: No fracture	21.071
51	0.742328	State 1: No fracture	21.501
52	0	State 2: Initial fracture	0
53	0.0288505	State 2: Initial fracture	0.43002
54	0.0572372	State 2: Initial fracture	0.86004
55	0.0851941	State 2: Initial fracture	1.29006
56	0.112744	State 2: Initial fracture	1.72008
57	0.139899	State 2: Initial fracture	2.1501
58	0.166664	State 2: Initial fracture	2.58012
59	0.19304	State 2: Initial fracture	3.01014
60	0.21902	State 2: Initial fracture	3.44016
61	0.244596	State 2: Initial fracture	3.87018
62	0.269758	State 2: Initial fracture	4.3002
63	0.294492	State 2: Initial fracture	4.73022
64	0.318785	State 2: Initial fracture	5.16024
65	0.342625	State 2: Initial fracture	5.59026
66	0.365997	State 2: Initial fracture	6.02028
67	0.388889	State 2: Initial fracture	6.4503
68	0.411289	State 2: Initial fracture	6.88032
69	0.433186	State 2: Initial fracture	7.31034
70	0.454571	State 2: Initial fracture	7.74036
71	0.475434	State 2: Initial fracture	8.17038
72	0.495771	State 2: Initial fracture	8.6004
73	0.515574	State 2: Initial fracture	9.03042
74	0.53484	State 2: Initial fracture	9.46044
75	0.553567	State 2: Initial fracture	9.89046
76	0.571752	State 2: Initial fracture	10.3205
77	0.589397	State 2: Initial fracture	10.7505
78	0.606503	State 2: Initial fracture	11.1805
79	0.623073	State 2: Initial fracture	11.6105
80	0.639109	State 2: Initial fracture	12.0406
81	0.654618	State 2: Initial fracture	12.4706
82	0.669605	State 2: Initial fracture	12.9006
83	0.684076	State 2: Initial fracture	13.3306
84	0.69804	State 2: Initial fracture	13.7606
85	0.711505	State 2: Initial fracture	14.1907
86	0.724479	State 2: Initial fracture	14.6207
87	0.736972	State 2: Initial fracture	15.0507
88	0.748995	State 2: Initial fracture	15.4807
89	0.760557	State 2: Initial fracture	15.9107
90	0.77167	State 2: Initial fracture	16.3408
91	0.782344	State 2: Initial fracture	16.7708
92	0.792592	State 2: Initial fracture	17.2008
93	0.802424	State 2: Initial fracture	17.6308
94	0.811852	State 2: Initial fracture	18.0608
95	0.820889	State 2: Initial fracture	18.4909
96	0.829545	State 2: Initial fracture	18.9209
97	0.837834	State 2: Initial fracture	19.3509
98	0.845766	State 2: Initial fracture	19.7809
99	0.853354	State 2: Initial fracture	20.2109
100	0.860608	State 2: Initial fracture	20.641
101	0.867542	State 2: Initial fracture	21.071
102	0.874165	State 2: Initial fracture	21.501
103	0	State 3: Second fracture	0
104	0.0377238	State 3: Second fracture	0.43002
105	0.0756723	State 3: Second fracture	0.86004
106	0.113576	State 3: Second fracture	1.29006
107	0.151208	State 3: Second fracture	1.72008
108	0.188375	State 3: Second fracture	2.1501
109	0.224919	State 3: Second fracture	2.58012
110	0.260707	State 3: Second fracture	3.01014
111	0.295634	State 3: Second fracture	3.44016
112	0.329613	State 3: Second fracture	3.87018
113	0.362578	State 3: Second fracture	4.3002
114	0.394479	State 3: Second fracture	4.73022
115	0.425281	State 3: Second fracture	5.16024
116	0.454959	State 3: Second fracture	5.59026
117	0.483501	State 3: Second fracture	6.02028
118	0.510903	State 3: Second fracture	6.4503
119	0.537168	State 3: Second fracture	6.88032
120	0.562307	State 3: Second fracture	7.31034
121	0.586334	State 3: Second fracture	7.74036
122	0.609271	State 3: Second fracture	8.17038
123	0.631141	State 3: Second fracture	8.6004
124	0.65197	State 3: Second fracture	9.03042
125	0.671788	State 3: Second fracture	9.46044
126	0.690626	State 3: Second fracture	9.89046
127	0.708516	State 3: Second fracture	10.3205
128	0.725492	State 3: Second fracture	10.7505
129	0.741587	State 3: Second fracture	11.1805
130	0.756836	State 3: Second fracture	11.6105
131	0.771272	State 3: Second fracture	12.0406
132	0.78493	State 3: Second fracture	12.4706
133	0.797844	State 3: Second fracture	12.9006
134	0.810046	State 3: Second fracture	13.3306
135	0.82157	State 3: Second fracture	13.7606
136	0.832447	State 3: Second fracture	14.1907
137	0.842708	State 3: Second fracture	14.6207
138	0.852384	State 3: Second fracture	15.0507
139	0.861502	State 3: Second fracture	15.4807
140	0.870092	State 3: Second fracture	15.9107
141	0.878181	State 3: Second fracture	16.3408
142	0.885795	State 3: Second fracture	16.7708
143	0.892958	State 3: Second fracture	17.2008
144	0.899695	State 3: Second fracture	17.6308
145	0.906029	State 3: Second fracture	18.0608
146	0.911983	State 3: Second fracture	18.4909
147	0.917576	State 3: Second fracture	18.9209
148	0.922829	State 3: Second fracture	19.3509
149	0.927762	State 3: Second fracture	19.7809
150	0.932392	State 3: Second fracture	20.2109
151	0.936737	State 3: Second fracture	20.641
152	0.940814	State 3: Second fracture	21.071
153	0.944637	State 3: Second fracture	21.501
154	0	State 4: Third & further fracture	0
155	0.0710379	State 4: Third & further fracture	0.43002
156	0.137029	State 4: Third & further fracture	0.86004
157	0.198333	State 4: Third & further fracture	1.29006
158	0.255282	State 4: Third & further fracture	1.72008
159	0.308185	State 4: Third & further fracture	2.1501
160	0.35733	State 4: Third & further fracture	2.58012
161	0.402984	State 4: Third & further fracture	3.01014
162	0.445395	State 4: Third & further fracture	3.44016
163	0.484793	State 4: Third & further fracture	3.87018
164	0.521392	State 4: Third & further fracture	4.3002
165	0.555391	State 4: Third & further fracture	4.73022
166	0.586975	State 4: Third & further fracture	5.16024
167	0.616316	State 4: Third & further fracture	5.59026
168	0.643572	State 4: Third & further fracture	6.02028
169	0.668892	State 4: Third & further fracture	6.4503
170	0.692413	State 4: Third & further fracture	6.88032
171	0.714263	State 4: Third & further fracture	7.31034
172	0.734561	State 4: Third & further fracture	7.74036
173	0.753417	State 4: Third & further fracture	8.17038
174	0.770934	State 4: Third & further fracture	8.6004
175	0.787207	State 4: Third & further fracture	9.03042
176	0.802323	State 4: Third & further fracture	9.46044
177	0.816365	State 4: Third & further fracture	9.89046
178	0.82941	State 4: Third & further fracture	10.3205
179	0.841529	State 4: Third & further fracture	10.7505
180	0.852786	State 4: Third & further fracture	11.1805
181	0.863244	State 4: Third & further fracture	11.6105
182	0.872959	State 4: Third & further fracture	12.0406
183	0.881984	State 4: Third & further fracture	12.4706
184	0.890367	State 4: Third & further fracture	12.9006
185	0.898155	State 4: Third & further fracture	13.3306
186	0.90539	State 4: Third & further fracture	13.7606
187	0.912111	State 4: Third & further fracture	14.1907
188	0.918354	State 4: Third & further fracture	14.6207
189	0.924154	State 4: Third & further fracture	15.0507
190	0.929542	State 4: Third & further fracture	15.4807
191	0.934547	State 4: Third & further fracture	15.9107
192	0.939197	State 4: Third & further fracture	16.3408
193	0.943516	State 4: Third & further fracture	16.7708
194	0.947529	State 4: Third & further fracture	17.2008
195	0.951256	State 4: Third & further fracture	17.6308
196	0.954719	State 4: Third & further fracture	18.0608
197	0.957936	State 4: Third & further fracture	18.4909
198	0.960924	State 4: Third & further fracture	18.9209
199	0.9637	State 4: Third & further fracture	19.3509
200	0.966278	State 4: Third & further fracture	19.7809
201	0.968674	State 4: Third & further fracture	20.2109
202	0.970899	State 4: Third & further fracture	20.641
203	0.972966	State 4: Third & further fracture	21.071
204	0.974887	State 4: Third & further fracture	21.501

[truncated: 8 more sheets: Men, Age = 60, T-score = 0, Men, Age = 60, T-score = -1.5, Men, Age = 60, T-score = -2.5, Men, Age = 70, T-score = -1.5, Men, Age = 70, T-score = -2.5, Men, Age = 80, T-score = 0, Men, Age = 80, T-score = -1.5, Men, Age = 80, T-score = -2.5]
