# Supplementary material for: Epidemiological transition to mortality and refracture following an initial fracture
Source: eLife. 2021 Feb 9;10:e61142. doi: 10.7554/eLife.61142 (PMC7924952; doi:10.7554/eLife.61142)
Supplement: Figure 3—figure supplement 2—source data 1. [file elife-61142-fig3-figsupp2-data1.xlsx]

## Sheet: observed
	Times	State 1	State 2	State 3	State 4	State 5
0	0	100	0	0	0	0
2.1501	2.1501	91.5897	4.8153	0.494723	0.0989446	3.00132
4.3002	4.3002	82.4668	7.3503	0.896379	0.215131	9.07135
6.4503	6.4503	73.3878	8.4898	1.5102	0.326531	16.2857
8.6004	8.6004	63.6323	9.37082	2.09728	0.535475	24.3641
10.7505	10.7505	53.1203	9.48577	2.1967	0.748877	34.4483
12.9006	12.9006	46.0366	9.90854	1.93089	1.11789	41.0061
15.0507	15.0507	39.0346	8.55194	2.41343	1.10178	48.8982
17.2008	17.2008	33.9862	8.52303	2.54103	1.27051	53.6792
19.3509	19.3509	20.836	5.46624	1.54341	1.15756	70.9968
21.501	21.501	0.088574	0	0	0	99.9114

## Sheet: expected
	estimates.State.1	estimates.State.2	estimates.State.3	estimates.State.4	estimates.State.5	ci.1.2.5.	ci.2.2.5.	ci.3.2.5.	ci.4.2.5.	ci.5.2.5.	ci.1.97.5.	ci.2.97.5.	ci.3.97.5.	ci.4.97.5.	ci.5.97.5.
0	100	0	0	0	0	100	0	0	0	0	100	0	0	0	0
2.1501	88.4418	5.37487	0.304577	0.0198508	5.85892	87.8506	4.9702	0.252637	0.0129892	5.44422	89.0131	5.81003	0.370513	0.029107	6.32513
4.3002	78.2195	9.18012	0.991855	0.124698	11.4838	77.1773	8.48768	0.819915	0.0817382	10.7209	79.2334	9.90712	1.19862	0.180572	12.3356
6.4503	69.1787	11.7645	1.81941	0.331015	16.9064	67.8008	10.8674	1.48318	0.214238	15.7954	70.5281	12.693	2.20979	0.475396	18.1033
8.6004	61.1829	13.407	2.64064	0.618162	22.1514	59.5634	12.2731	2.13447	0.390267	20.7719	62.7792	14.4791	3.20459	0.896552	23.6623
10.7505	54.1112	14.3298	3.37308	0.952785	27.2331	52.3268	13.0439	2.6826	0.590532	25.5727	55.8818	15.5615	4.11698	1.39583	29.027
12.9006	47.8569	14.7098	3.97627	1.30144	32.1556	45.9695	13.2698	3.13386	0.805877	30.2486	49.7421	16.0712	4.87815	1.90128	34.2082
15.0507	42.3255	14.6865	4.43646	1.63634	36.9152	40.3845	13.1421	3.43361	0.997231	34.7841	44.277	16.138	5.4844	2.42875	39.1692
17.2008	37.4334	14.3701	4.75623	1.93722	41.5031	35.478	12.712	3.6021	1.15437	39.2043	39.4123	15.9633	5.96339	2.90082	43.9702
19.3509	33.1068	13.8465	4.94737	2.1912	45.9081	31.1676	12.1576	3.71553	1.27736	43.3997	35.0821	15.5346	6.28834	3.36154	48.5365
21.501	29.2802	13.1828	5.02637	2.39176	50.1189	27.381	11.4703	3.72872	1.37315	47.4094	31.2277	14.9342	6.4287	3.7766	52.8524
