# Supplementary material for: Epidemiological transition to mortality and refracture following an initial fracture
Source: eLife. 2021 Feb 9;10:e61142. doi: 10.7554/eLife.61142 (PMC7924952; doi:10.7554/eLife.61142)
Supplement: Figure 3—source data 1. — Risk was estimated for women and men with different BMD profiles (i.e.,−1.5 vs −2.5), at the event age of 70 and 80, having all other factors set to the population mean, that is, body massindex = 26.6 kg/m2, no history of fall at baseline, no prior fracture and no comorbidities. [file elife-61142-fig3-data1.xlsx]

## Sheet: Women, Age = 80, T-score = -2.5
	survival.prob	state	times
1	0	State 1: No fracture	0
2	0.0211648	State 1: No fracture	0.43002
3	0.0420567	State 1: No fracture	0.86004
4	0.0626776	State 1: No fracture	1.29006
5	0.0830297	State 1: No fracture	1.72008
6	0.103116	State 1: No fracture	2.1501
7	0.122938	State 1: No fracture	2.58012
8	0.1425	State 1: No fracture	3.01014
9	0.161804	State 1: No fracture	3.44016
10	0.180851	State 1: No fracture	3.87018
11	0.199645	State 1: No fracture	4.3002
12	0.218185	State 1: No fracture	4.73022
13	0.236475	State 1: No fracture	5.16024
14	0.254513	State 1: No fracture	5.59026
15	0.272301	State 1: No fracture	6.02028
16	0.28984	State 1: No fracture	6.4503
17	0.307128	State 1: No fracture	6.88032
18	0.324165	State 1: No fracture	7.31034
19	0.340952	State 1: No fracture	7.74036
20	0.357486	State 1: No fracture	8.17038
21	0.373768	State 1: No fracture	8.6004
22	0.389796	State 1: No fracture	9.03042
23	0.405569	State 1: No fracture	9.46044
24	0.421086	State 1: No fracture	9.89046
25	0.436347	State 1: No fracture	10.3205
26	0.451349	State 1: No fracture	10.7505
27	0.466092	State 1: No fracture	11.1805
28	0.480575	State 1: No fracture	11.6105
29	0.494797	State 1: No fracture	12.0406
30	0.508758	State 1: No fracture	12.4706
31	0.522457	State 1: No fracture	12.9006
32	0.535894	State 1: No fracture	13.3306
33	0.549069	State 1: No fracture	13.7606
34	0.561981	State 1: No fracture	14.1907
35	0.574631	State 1: No fracture	14.6207
36	0.587019	State 1: No fracture	15.0507
37	0.599146	State 1: No fracture	15.4807
38	0.611012	State 1: No fracture	15.9107
39	0.62262	State 1: No fracture	16.3408
40	0.633969	State 1: No fracture	16.7708
41	0.645062	State 1: No fracture	17.2008
42	0.6559	State 1: No fracture	17.6308
43	0.666485	State 1: No fracture	18.0608
44	0.676819	State 1: No fracture	18.4909
45	0.686903	State 1: No fracture	18.9209
46	0.696742	State 1: No fracture	19.3509
47	0.706336	State 1: No fracture	19.7809
48	0.715688	State 1: No fracture	20.2109
49	0.724803	State 1: No fracture	20.641
50	0.733681	State 1: No fracture	21.071
51	0.742328	State 1: No fracture	21.501
52	0	State 2: Initial fracture	0
53	0.0288505	State 2: Initial fracture	0.43002
54	0.0572372	State 2: Initial fracture	0.86004
55	0.0851941	State 2: Initial fracture	1.29006
56	0.112744	State 2: Initial fracture	1.72008
57	0.139899	State 2: Initial fracture	2.1501
58	0.166664	State 2: Initial fracture	2.58012
59	0.19304	State 2: Initial fracture	3.01014
60	0.21902	State 2: Initial fracture	3.44016
61	0.244596	State 2: Initial fracture	3.87018
62	0.269758	State 2: Initial fracture	4.3002
63	0.294492	State 2: Initial fracture	4.73022
64	0.318785	State 2: Initial fracture	5.16024
65	0.342625	State 2: Initial fracture	5.59026
66	0.365997	State 2: Initial fracture	6.02028
67	0.388889	State 2: Initial fracture	6.4503
68	0.411289	State 2: Initial fracture	6.88032
69	0.433186	State 2: Initial fracture	7.31034
70	0.454571	State 2: Initial fracture	7.74036
71	0.475434	State 2: Initial fracture	8.17038
72	0.495771	State 2: Initial fracture	8.6004
73	0.515574	State 2: Initial fracture	9.03042
74	0.53484	State 2: Initial fracture	9.46044
75	0.553567	State 2: Initial fracture	9.89046
76	0.571752	State 2: Initial fracture	10.3205
77	0.589397	State 2: Initial fracture	10.7505
78	0.606503	State 2: Initial fracture	11.1805
79	0.623073	State 2: Initial fracture	11.6105
80	0.639109	State 2: Initial fracture	12.0406
81	0.654618	State 2: Initial fracture	12.4706
82	0.669605	State 2: Initial fracture	12.9006
83	0.684076	State 2: Initial fracture	13.3306
84	0.69804	State 2: Initial fracture	13.7606
85	0.711505	State 2: Initial fracture	14.1907
86	0.724479	State 2: Initial fracture	14.6207
87	0.736972	State 2: Initial fracture	15.0507
88	0.748995	State 2: Initial fracture	15.4807
89	0.760557	State 2: Initial fracture	15.9107
90	0.77167	State 2: Initial fracture	16.3408
91	0.782344	State 2: Initial fracture	16.7708
92	0.792592	State 2: Initial fracture	17.2008
93	0.802424	State 2: Initial fracture	17.6308
94	0.811852	State 2: Initial fracture	18.0608
95	0.820889	State 2: Initial fracture	18.4909
96	0.829545	State 2: Initial fracture	18.9209
97	0.837834	State 2: Initial fracture	19.3509
98	0.845766	State 2: Initial fracture	19.7809
99	0.853354	State 2: Initial fracture	20.2109
100	0.860608	State 2: Initial fracture	20.641
101	0.867542	State 2: Initial fracture	21.071
102	0.874165	State 2: Initial fracture	21.501
103	0	State 3: Second fracture	0
104	0.0377238	State 3: Second fracture	0.43002
105	0.0756723	State 3: Second fracture	0.86004
106	0.113576	State 3: Second fracture	1.29006
107	0.151208	State 3: Second fracture	1.72008
108	0.188375	State 3: Second fracture	2.1501
109	0.224919	State 3: Second fracture	2.58012
110	0.260707	State 3: Second fracture	3.01014
111	0.295634	State 3: Second fracture	3.44016
112	0.329613	State 3: Second fracture	3.87018
113	0.362578	State 3: Second fracture	4.3002
114	0.394479	State 3: Second fracture	4.73022
115	0.425281	State 3: Second fracture	5.16024
116	0.454959	State 3: Second fracture	5.59026
117	0.483501	State 3: Second fracture	6.02028
118	0.510903	State 3: Second fracture	6.4503
119	0.537168	State 3: Second fracture	6.88032
120	0.562307	State 3: Second fracture	7.31034
121	0.586334	State 3: Second fracture	7.74036
122	0.609271	State 3: Second fracture	8.17038
123	0.631141	State 3: Second fracture	8.6004
124	0.65197	State 3: Second fracture	9.03042
125	0.671788	State 3: Second fracture	9.46044
126	0.690626	State 3: Second fracture	9.89046
127	0.708516	State 3: Second fracture	10.3205
128	0.725492	State 3: Second fracture	10.7505
129	0.741587	State 3: Second fracture	11.1805
130	0.756836	State 3: Second fracture	11.6105
131	0.771272	State 3: Second fracture	12.0406
132	0.78493	State 3: Second fracture	12.4706
133	0.797844	State 3: Second fracture	12.9006
134	0.810046	State 3: Second fracture	13.3306
135	0.82157	State 3: Second fracture	13.7606
136	0.832447	State 3: Second fracture	14.1907
137	0.842708	State 3: Second fracture	14.6207
138	0.852384	State 3: Second fracture	15.0507
139	0.861502	State 3: Second fracture	15.4807
140	0.870092	State 3: Second fracture	15.9107
141	0.878181	State 3: Second fracture	16.3408
142	0.885795	State 3: Second fracture	16.7708
143	0.892958	State 3: Second fracture	17.2008
144	0.899695	State 3: Second fracture	17.6308
145	0.906029	State 3: Second fracture	18.0608
146	0.911983	State 3: Second fracture	18.4909
147	0.917576	State 3: Second fracture	18.9209
148	0.922829	State 3: Second fracture	19.3509
149	0.927762	State 3: Second fracture	19.7809
150	0.932392	State 3: Second fracture	20.2109
151	0.936737	State 3: Second fracture	20.641
152	0.940814	State 3: Second fracture	21.071
153	0.944637	State 3: Second fracture	21.501
154	0	State 4: Third & further fracture	0
155	0.0710379	State 4: Third & further fracture	0.43002
156	0.137029	State 4: Third & further fracture	0.86004
157	0.198333	State 4: Third & further fracture	1.29006
158	0.255282	State 4: Third & further fracture	1.72008
159	0.308185	State 4: Third & further fracture	2.1501
160	0.35733	State 4: Third & further fracture	2.58012
161	0.402984	State 4: Third & further fracture	3.01014
162	0.445395	State 4: Third & further fracture	3.44016
163	0.484793	State 4: Third & further fracture	3.87018
164	0.521392	State 4: Third & further fracture	4.3002
165	0.555391	State 4: Third & further fracture	4.73022
166	0.586975	State 4: Third & further fracture	5.16024
167	0.616316	State 4: Third & further fracture	5.59026
168	0.643572	State 4: Third & further fracture	6.02028
169	0.668892	State 4: Third & further fracture	6.4503
170	0.692413	State 4: Third & further fracture	6.88032
171	0.714263	State 4: Third & further fracture	7.31034
172	0.734561	State 4: Third & further fracture	7.74036
173	0.753417	State 4: Third & further fracture	8.17038
174	0.770934	State 4: Third & further fracture	8.6004
175	0.787207	State 4: Third & further fracture	9.03042
176	0.802323	State 4: Third & further fracture	9.46044
177	0.816365	State 4: Third & further fracture	9.89046
178	0.82941	State 4: Third & further fracture	10.3205
179	0.841529	State 4: Third & further fracture	10.7505
180	0.852786	State 4: Third & further fracture	11.1805
181	0.863244	State 4: Third & further fracture	11.6105
182	0.872959	State 4: Third & further fracture	12.0406
183	0.881984	State 4: Third & further fracture	12.4706
184	0.890367	State 4: Third & further fracture	12.9006
185	0.898155	State 4: Third & further fracture	13.3306
186	0.90539	State 4: Third & further fracture	13.7606
187	0.912111	State 4: Third & further fracture	14.1907
188	0.918354	State 4: Third & further fracture	14.6207
189	0.924154	State 4: Third & further fracture	15.0507
190	0.929542	State 4: Third & further fracture	15.4807
191	0.934547	State 4: Third & further fracture	15.9107
192	0.939197	State 4: Third & further fracture	16.3408
193	0.943516	State 4: Third & further fracture	16.7708
194	0.947529	State 4: Third & further fracture	17.2008
195	0.951256	State 4: Third & further fracture	17.6308
196	0.954719	State 4: Third & further fracture	18.0608
197	0.957936	State 4: Third & further fracture	18.4909
198	0.960924	State 4: Third & further fracture	18.9209
199	0.9637	State 4: Third & further fracture	19.3509
200	0.966278	State 4: Third & further fracture	19.7809
201	0.968674	State 4: Third & further fracture	20.2109
202	0.970899	State 4: Third & further fracture	20.641
203	0.972966	State 4: Third & further fracture	21.071
204	0.974887	State 4: Third & further fracture	21.501

## Sheet: Women, Age = 70, T-score = -1.5
	survival.prob	state	times
1	0	State 1: No fracture	0
2	0.00761853	State 1: No fracture	0.43002
3	0.0151941	State 1: No fracture	0.86004
4	0.0227271	State 1: No fracture	1.29006
5	0.0302181	State 1: No fracture	1.72008
6	0.0376681	State 1: No fracture	2.1501
7	0.045078	State 1: No fracture	2.58012
8	0.052449	State 1: No fracture	3.01014
9	0.0597821	State 1: No fracture	3.44016
10	0.0670788	State 1: No fracture	3.87018
11	0.0743403	State 1: No fracture	4.3002
12	0.0815681	State 1: No fracture	4.73022
13	0.0887634	State 1: No fracture	5.16024
14	0.0959278	State 1: No fracture	5.59026
15	0.103063	State 1: No fracture	6.02028
16	0.110169	State 1: No fracture	6.4503
17	0.117249	State 1: No fracture	6.88032
18	0.124303	State 1: No fracture	7.31034
19	0.131333	State 1: No fracture	7.74036
20	0.138339	State 1: No fracture	8.17038
21	0.145324	State 1: No fracture	8.6004
22	0.152287	State 1: No fracture	9.03042
23	0.159231	State 1: No fracture	9.46044
24	0.166155	State 1: No fracture	9.89046
25	0.173062	State 1: No fracture	10.3205
26	0.179951	State 1: No fracture	10.7505
27	0.186823	State 1: No fracture	11.1805
28	0.19368	State 1: No fracture	11.6105
29	0.200521	State 1: No fracture	12.0406
30	0.207348	State 1: No fracture	12.4706
31	0.214159	State 1: No fracture	12.9006
32	0.220957	State 1: No fracture	13.3306
33	0.227741	State 1: No fracture	13.7606
34	0.234512	State 1: No fracture	14.1907
35	0.241269	State 1: No fracture	14.6207
36	0.248013	State 1: No fracture	15.0507
37	0.254743	State 1: No fracture	15.4807
38	0.261461	State 1: No fracture	15.9107
39	0.268165	State 1: No fracture	16.3408
40	0.274855	State 1: No fracture	16.7708
41	0.281532	State 1: No fracture	17.2008
42	0.288195	State 1: No fracture	17.6308
43	0.294844	State 1: No fracture	18.0608
44	0.301478	State 1: No fracture	18.4909
45	0.308098	State 1: No fracture	18.9209
46	0.314702	State 1: No fracture	19.3509
47	0.321291	State 1: No fracture	19.7809
48	0.327863	State 1: No fracture	20.2109
49	0.334419	State 1: No fracture	20.641
50	0.340958	State 1: No fracture	21.071
51	0.347479	State 1: No fracture	21.501
52	0	State 2: Initial fracture	0
53	0.00892179	State 2: Initial fracture	0.43002
54	0.0177983	State 2: Initial fracture	0.86004
55	0.0266509	State 2: Initial fracture	1.29006
56	0.0354983	State 2: Initial fracture	1.72008
57	0.0443566	State 2: Initial fracture	2.1501
58	0.0532393	State 2: Initial fracture	2.58012
59	0.0621579	State 2: Initial fracture	3.01014
60	0.0711218	State 2: Initial fracture	3.44016
61	0.0801387	State 2: Initial fracture	3.87018
62	0.0892146	State 2: Initial fracture	4.3002
63	0.0983541	State 2: Initial fracture	4.73022
64	0.10756	State 2: Initial fracture	5.16024
65	0.116836	State 2: Initial fracture	5.59026
66	0.126181	State 2: Initial fracture	6.02028
67	0.135595	State 2: Initial fracture	6.4503
68	0.145079	State 2: Initial fracture	6.88032
69	0.15463	State 2: Initial fracture	7.31034
70	0.164247	State 2: Initial fracture	7.74036
71	0.173925	State 2: Initial fracture	8.17038
72	0.183663	State 2: Initial fracture	8.6004
73	0.193456	State 2: Initial fracture	9.03042
74	0.2033	State 2: Initial fracture	9.46044
75	0.21319	State 2: Initial fracture	9.89046
76	0.223123	State 2: Initial fracture	10.3205
77	0.233092	State 2: Initial fracture	10.7505
78	0.243093	State 2: Initial fracture	11.1805
79	0.253121	State 2: Initial fracture	11.6105
80	0.26317	State 2: Initial fracture	12.0406
81	0.273235	State 2: Initial fracture	12.4706
82	0.28331	State 2: Initial fracture	12.9006
83	0.293391	State 2: Initial fracture	13.3306
84	0.303472	State 2: Initial fracture	13.7606
85	0.313547	State 2: Initial fracture	14.1907
86	0.323611	State 2: Initial fracture	14.6207
87	0.333659	State 2: Initial fracture	15.0507
88	0.343686	State 2: Initial fracture	15.4807
89	0.353686	State 2: Initial fracture	15.9107
90	0.363656	State 2: Initial fracture	16.3408
91	0.37359	State 2: Initial fracture	16.7708
92	0.383484	State 2: Initial fracture	17.2008
93	0.393333	State 2: Initial fracture	17.6308
94	0.403133	State 2: Initial fracture	18.0608
95	0.41288	State 2: Initial fracture	18.4909
96	0.422569	State 2: Initial fracture	18.9209
97	0.432198	State 2: Initial fracture	19.3509
98	0.441761	State 2: Initial fracture	19.7809
99	0.451257	State 2: Initial fracture	20.2109
100	0.460681	State 2: Initial fracture	20.641
101	0.47003	State 2: Initial fracture	21.071
102	0.479301	State 2: Initial fracture	21.501
103	0	State 3: Second fracture	0
104	0.0100167	State 3: Second fracture	0.43002
105	0.021075	State 3: Second fracture	0.86004
106	0.0330617	State 3: Second fracture	1.29006
107	0.0458717	State 3: Second fracture	1.72008
108	0.0594077	State 3: Second fracture	2.1501
109	0.0735793	State 3: Second fracture	2.58012
110	0.0883031	State 3: Second fracture	3.01014
111	0.103502	State 3: Second fracture	3.44016
112	0.119104	State 3: Second fracture	3.87018
113	0.135044	State 3: Second fracture	4.3002
114	0.151261	State 3: Second fracture	4.73022
115	0.167699	State 3: Second fracture	5.16024
116	0.184307	State 3: Second fracture	5.59026
117	0.201037	State 3: Second fracture	6.02028
118	0.217846	State 3: Second fracture	6.4503
119	0.234695	State 3: Second fracture	6.88032
120	0.251547	State 3: Second fracture	7.31034
121	0.26837	State 3: Second fracture	7.74036
122	0.285132	State 3: Second fracture	8.17038
123	0.301808	State 3: Second fracture	8.6004
124	0.318371	State 3: Second fracture	9.03042
125	0.334801	State 3: Second fracture	9.46044
126	0.351076	State 3: Second fracture	9.89046
127	0.367179	State 3: Second fracture	10.3205
128	0.383093	State 3: Second fracture	10.7505
129	0.398805	State 3: Second fracture	11.1805
130	0.414301	State 3: Second fracture	11.6105
131	0.42957	State 3: Second fracture	12.0406
132	0.444604	State 3: Second fracture	12.4706
133	0.459392	State 3: Second fracture	12.9006
134	0.473929	State 3: Second fracture	13.3306
135	0.488207	State 3: Second fracture	13.7606
136	0.502223	State 3: Second fracture	14.1907
137	0.515972	State 3: Second fracture	14.6207
138	0.52945	State 3: Second fracture	15.0507
139	0.542656	State 3: Second fracture	15.4807
140	0.555587	State 3: Second fracture	15.9107
141	0.568243	State 3: Second fracture	16.3408
142	0.580624	State 3: Second fracture	16.7708
143	0.592729	State 3: Second fracture	17.2008
144	0.60456	State 3: Second fracture	17.6308
145	0.616117	State 3: Second fracture	18.0608
146	0.627402	State 3: Second fracture	18.4909
147	0.638417	State 3: Second fracture	18.9209
148	0.649165	State 3: Second fracture	19.3509
149	0.659648	State 3: Second fracture	19.7809
150	0.669869	State 3: Second fracture	20.2109
151	0.679832	State 3: Second fracture	20.641
152	0.689539	State 3: Second fracture	21.071
153	0.698995	State 3: Second fracture	21.501
154	0	State 4: Third & further fracture	0
155	0.0540818	State 4: Third & further fracture	0.43002
156	0.105239	State 4: Third & further fracture	0.86004
157	0.153629	State 4: Third & further fracture	1.29006
158	0.199402	State 4: Third & further fracture	1.72008
159	0.2427	State 4: Third & further fracture	2.1501
160	0.283656	State 4: Third & further fracture	2.58012
161	0.322397	State 4: Third & further fracture	3.01014
162	0.359043	State 4: Third & further fracture	3.44016
163	0.393707	State 4: Third & further fracture	3.87018
164	0.426497	State 4: Third & further fracture	4.3002
165	0.457513	State 4: Third & further fracture	4.73022
166	0.486851	State 4: Third & further fracture	5.16024
167	0.514603	State 4: Third & further fracture	5.59026
168	0.540855	State 4: Third & further fracture	6.02028
169	0.565686	State 4: Third & further fracture	6.4503
170	0.589174	State 4: Third & further fracture	6.88032
171	0.611393	State 4: Third & further fracture	7.31034
172	0.632409	State 4: Third & further fracture	7.74036
173	0.652289	State 4: Third & further fracture	8.17038
174	0.671094	State 4: Third & further fracture	8.6004
175	0.688882	State 4: Third & further fracture	9.03042
176	0.705708	State 4: Third & further fracture	9.46044
177	0.721623	State 4: Third & further fracture	9.89046
178	0.736679	State 4: Third & further fracture	10.3205
179	0.750919	State 4: Third & further fracture	10.7505
180	0.76439	State 4: Third & further fracture	11.1805
181	0.777132	State 4: Third & further fracture	11.6105
182	0.789185	State 4: Third & further fracture	12.0406
183	0.800587	State 4: Third & further fracture	12.4706
184	0.811371	State 4: Third & further fracture	12.9006
185	0.821573	State 4: Third & further fracture	13.3306
186	0.831222	State 4: Third & further fracture	13.7606
187	0.84035	State 4: Third & further fracture	14.1907
188	0.848984	State 4: Third & further fracture	14.6207
189	0.857152	State 4: Third & further fracture	15.0507
190	0.864877	State 4: Third & further fracture	15.4807
191	0.872185	State 4: Third & further fracture	15.9107
192	0.879097	State 4: Third & further fracture	16.3408
193	0.885636	State 4: Third & further fracture	16.7708
194	0.891821	State 4: Third & further fracture	17.2008
195	0.897671	State 4: Third & further fracture	17.6308
196	0.903205	State 4: Third & further fracture	18.0608
197	0.90844	State 4: Third & further fracture	18.4909
198	0.913392	State 4: Third & further fracture	18.9209
199	0.918076	State 4: Third & further fracture	19.3509
200	0.922507	State 4: Third & further fracture	19.7809
201	0.926698	State 4: Third & further fracture	20.2109
202	0.930662	State 4: Third & further fracture	20.641
203	0.934412	State 4: Third & further fracture	21.071
204	0.937959	State 4: Third & further fracture	21.501

## Sheet: Women, Age = 70, T-score = -2.5
	survival.prob	state	times
1	0	State 1: No fracture	0
2	0.00796688	State 1: No fracture	0.43002
3	0.0159127	State 1: No fracture	0.86004
4	0.0238383	State 1: No fracture	1.29006
5	0.0317448	State 1: No fracture	1.72008
6	0.0396336	State 1: No fracture	2.1501
7	0.0475063	State 1: No fracture	2.58012
8	0.0553645	State 1: No fracture	3.01014
9	0.0632101	State 1: No fracture	3.44016
10	0.0710448	State 1: No fracture	3.87018
11	0.0788704	State 1: No fracture	4.3002
12	0.0866888	State 1: No fracture	4.73022
13	0.0945016	State 1: No fracture	5.16024
14	0.102311	State 1: No fracture	5.59026
15	0.110117	State 1: No fracture	6.02028
16	0.117923	State 1: No fracture	6.4503
17	0.12573	State 1: No fracture	6.88032
18	0.133538	State 1: No fracture	7.31034
19	0.141349	State 1: No fracture	7.74036
20	0.149165	State 1: No fracture	8.17038
21	0.156984	State 1: No fracture	8.6004
22	0.16481	State 1: No fracture	9.03042
23	0.172641	State 1: No fracture	9.46044
24	0.180478	State 1: No fracture	9.89046
25	0.188322	State 1: No fracture	10.3205
26	0.196173	State 1: No fracture	10.7505
27	0.20403	State 1: No fracture	11.1805
28	0.211893	State 1: No fracture	11.6105
29	0.219762	State 1: No fracture	12.0406
30	0.227638	State 1: No fracture	12.4706
31	0.235518	State 1: No fracture	12.9006
32	0.243402	State 1: No fracture	13.3306
33	0.25129	State 1: No fracture	13.7606
34	0.259181	State 1: No fracture	14.1907
35	0.267073	State 1: No fracture	14.6207
36	0.274966	State 1: No fracture	15.0507
37	0.282858	State 1: No fracture	15.4807
38	0.290749	State 1: No fracture	15.9107
39	0.298636	State 1: No fracture	16.3408
40	0.306519	State 1: No fracture	16.7708
41	0.314396	State 1: No fracture	17.2008
42	0.322265	State 1: No fracture	17.6308
43	0.330125	State 1: No fracture	18.0608
44	0.337975	State 1: No fracture	18.4909
45	0.345813	State 1: No fracture	18.9209
46	0.353637	State 1: No fracture	19.3509
47	0.361445	State 1: No fracture	19.7809
48	0.369236	State 1: No fracture	20.2109
49	0.377008	State 1: No fracture	20.641
50	0.38476	State 1: No fracture	21.071
51	0.392489	State 1: No fracture	21.501
52	0	State 2: Initial fracture	0
53	0.0103789	State 2: Initial fracture	0.43002
54	0.0207657	State 2: Initial fracture	0.86004
55	0.031181	State 2: Initial fracture	1.29006
56	0.0416415	State 2: Initial fracture	1.72008
57	0.0521608	State 2: Initial fracture	2.1501
58	0.06275	State 2: Initial fracture	2.58012
59	0.0734172	State 2: Initial fracture	3.01014
60	0.0841685	State 2: Initial fracture	3.44016
61	0.0950078	State 2: Initial fracture	3.87018
62	0.105937	State 2: Initial fracture	4.3002
63	0.116958	State 2: Initial fracture	4.73022
64	0.128068	State 2: Initial fracture	5.16024
65	0.139265	State 2: Initial fracture	5.59026
66	0.150548	State 2: Initial fracture	6.02028
67	0.16191	State 2: Initial fracture	6.4503
68	0.173348	State 2: Initial fracture	6.88032
69	0.184855	State 2: Initial fracture	7.31034
70	0.196426	State 2: Initial fracture	7.74036
71	0.208054	State 2: Initial fracture	8.17038
72	0.219731	State 2: Initial fracture	8.6004
73	0.23145	State 2: Initial fracture	9.03042
74	0.243203	State 2: Initial fracture	9.46044
75	0.254983	State 2: Initial fracture	9.89046
76	0.266782	State 2: Initial fracture	10.3205
77	0.278591	State 2: Initial fracture	10.7505
78	0.290403	State 2: Initial fracture	11.1805
79	0.30221	State 2: Initial fracture	11.6105
80	0.314004	State 2: Initial fracture	12.0406
81	0.325776	State 2: Initial fracture	12.4706
82	0.337521	State 2: Initial fracture	12.9006
83	0.349229	State 2: Initial fracture	13.3306
84	0.360895	State 2: Initial fracture	13.7606
85	0.37251	State 2: Initial fracture	14.1907
86	0.384068	State 2: Initial fracture	14.6207
87	0.395562	State 2: Initial fracture	15.0507
88	0.406987	State 2: Initial fracture	15.4807
89	0.418336	State 2: Initial fracture	15.9107
90	0.429603	State 2: Initial fracture	16.3408
91	0.440782	State 2: Initial fracture	16.7708
92	0.451869	State 2: Initial fracture	17.2008
93	0.462859	State 2: Initial fracture	17.6308
94	0.473746	State 2: Initial fracture	18.0608
95	0.484527	State 2: Initial fracture	18.4909
96	0.495196	State 2: Initial fracture	18.9209
97	0.505751	State 2: Initial fracture	19.3509
98	0.516188	State 2: Initial fracture	19.7809
99	0.526502	State 2: Initial fracture	20.2109
100	0.536692	State 2: Initial fracture	20.641
101	0.546755	State 2: Initial fracture	21.071
102	0.556686	State 2: Initial fracture	21.501
103	0	State 3: Second fracture	0
104	0.0139444	State 3: Second fracture	0.43002
105	0.0286583	State 3: Second fracture	0.86004
106	0.0440438	State 3: Second fracture	1.29006
107	0.0600104	State 3: Second fracture	1.72008
108	0.0764744	State 3: Second fracture	2.1501
109	0.0933585	State 3: Second fracture	2.58012
110	0.110591	State 3: Second fracture	3.01014
111	0.128107	State 3: Second fracture	3.44016
112	0.145846	State 3: Second fracture	3.87018
113	0.163751	State 3: Second fracture	4.3002
114	0.181772	State 3: Second fracture	4.73022
115	0.199862	State 3: Second fracture	5.16024
116	0.217978	State 3: Second fracture	5.59026
117	0.236081	State 3: Second fracture	6.02028
118	0.254136	State 3: Second fracture	6.4503
119	0.27211	State 3: Second fracture	6.88032
120	0.289974	State 3: Second fracture	7.31034
121	0.307702	State 3: Second fracture	7.74036
122	0.325268	State 3: Second fracture	8.17038
123	0.342653	State 3: Second fracture	8.6004
124	0.359837	State 3: Second fracture	9.03042
125	0.376802	State 3: Second fracture	9.46044
126	0.393533	State 3: Second fracture	9.89046
127	0.410018	State 3: Second fracture	10.3205
128	0.426245	State 3: Second fracture	10.7505
129	0.442203	State 3: Second fracture	11.1805
130	0.457883	State 3: Second fracture	11.6105
131	0.473279	State 3: Second fracture	12.0406
132	0.488385	State 3: Second fracture	12.4706
133	0.503195	State 3: Second fracture	12.9006
134	0.517705	State 3: Second fracture	13.3306
135	0.531913	State 3: Second fracture	13.7606
136	0.545815	State 3: Second fracture	14.1907
137	0.559412	State 3: Second fracture	14.6207
138	0.572703	State 3: Second fracture	15.0507
139	0.585687	State 3: Second fracture	15.4807
140	0.598365	State 3: Second fracture	15.9107
141	0.610738	State 3: Second fracture	16.3408
142	0.622809	State 3: Second fracture	16.7708
143	0.63458	State 3: Second fracture	17.2008
144	0.646052	State 3: Second fracture	17.6308
145	0.65723	State 3: Second fracture	18.0608
146	0.668117	State 3: Second fracture	18.4909
147	0.678715	State 3: Second fracture	18.9209
148	0.68903	State 3: Second fracture	19.3509
149	0.699065	State 3: Second fracture	19.7809
150	0.708824	State 3: Second fracture	20.2109
151	0.718313	State 3: Second fracture	20.641
152	0.727535	State 3: Second fracture	21.071
153	0.736496	State 3: Second fracture	21.501
154	0	State 4: Third & further fracture	0
155	0.041922	State 4: Third & further fracture	0.43002
156	0.0820865	State 4: Third & further fracture	0.86004
157	0.120567	State 4: Third & further fracture	1.29006
158	0.157435	State 4: Third & further fracture	1.72008
159	0.192757	State 4: Third & further fracture	2.1501
160	0.226598	State 4: Third & further fracture	2.58012
161	0.259021	State 4: Third & further fracture	3.01014
162	0.290084	State 4: Third & further fracture	3.44016
163	0.319845	State 4: Third & further fracture	3.87018
164	0.348358	State 4: Third & further fracture	4.3002
165	0.375677	State 4: Third & further fracture	4.73022
166	0.401849	State 4: Third & further fracture	5.16024
167	0.426925	State 4: Third & further fracture	5.59026
168	0.45095	State 4: Third & further fracture	6.02028
169	0.473967	State 4: Third & further fracture	6.4503
170	0.496019	State 4: Third & further fracture	6.88032
171	0.517147	State 4: Third & further fracture	7.31034
172	0.537389	State 4: Third & further fracture	7.74036
173	0.556783	State 4: Third & further fracture	8.17038
174	0.575363	State 4: Third & further fracture	8.6004
175	0.593165	State 4: Third & further fracture	9.03042
176	0.61022	State 4: Third & further fracture	9.46044
177	0.626561	State 4: Third & further fracture	9.89046
178	0.642216	State 4: Third & further fracture	10.3205
179	0.657215	State 4: Third & further fracture	10.7505
180	0.671585	State 4: Third & further fracture	11.1805
181	0.685353	State 4: Third & further fracture	11.6105
182	0.698544	State 4: Third & further fracture	12.0406
183	0.711181	State 4: Third & further fracture	12.4706
184	0.723289	State 4: Third & further fracture	12.9006
185	0.734889	State 4: Third & further fracture	13.3306
186	0.746003	State 4: Third & further fracture	13.7606
187	0.756651	State 4: Third & further fracture	14.1907
188	0.766853	State 4: Third & further fracture	14.6207
189	0.776627	State 4: Third & further fracture	15.0507
190	0.785991	State 4: Third & further fracture	15.4807
191	0.794963	State 4: Third & further fracture	15.9107
192	0.803558	State 4: Third & further fracture	16.3408
193	0.811794	State 4: Third & further fracture	16.7708
194	0.819684	State 4: Third & further fracture	17.2008
195	0.827243	State 4: Third & further fracture	17.6308
196	0.834485	State 4: Third & further fracture	18.0608
197	0.841424	State 4: Third & further fracture	18.4909
198	0.848072	State 4: Third & further fracture	18.9209
199	0.854441	State 4: Third & further fracture	19.3509
200	0.860543	State 4: Third & further fracture	19.7809
201	0.866389	State 4: Third & further fracture	20.2109
202	0.871991	State 4: Third & further fracture	20.641
203	0.877357	State 4: Third & further fracture	21.071
204	0.882498	State 4: Third & further fracture	21.501

## Sheet: Women, Age = 80, T-score = -1.5
	survival.prob	state	times
1	0	State 1: No fracture	0
2	0.0202287	State 1: No fracture	0.43002
3	0.0401168	State 1: No fracture	0.86004
4	0.0596689	State 1: No fracture	1.29006
5	0.0788905	State 1: No fracture	1.72008
6	0.0977875	State 1: No fracture	2.1501
7	0.116366	State 1: No fracture	2.58012
8	0.134633	State 1: No fracture	3.01014
9	0.152594	State 1: No fracture	3.44016
10	0.170256	State 1: No fracture	3.87018
11	0.187626	State 1: No fracture	4.3002
12	0.204709	State 1: No fracture	4.73022
13	0.221511	State 1: No fracture	5.16024
14	0.238038	State 1: No fracture	5.59026
15	0.254295	State 1: No fracture	6.02028
16	0.270288	State 1: No fracture	6.4503
17	0.28602	State 1: No fracture	6.88032
18	0.301497	State 1: No fracture	7.31034
19	0.316722	State 1: No fracture	7.74036
20	0.3317	State 1: No fracture	8.17038
21	0.346434	State 1: No fracture	8.6004
22	0.360928	State 1: No fracture	9.03042
23	0.375184	State 1: No fracture	9.46044
24	0.389206	State 1: No fracture	9.89046
25	0.402996	State 1: No fracture	10.3205
26	0.416557	State 1: No fracture	10.7505
27	0.429892	State 1: No fracture	11.1805
28	0.443002	State 1: No fracture	11.6105
29	0.45589	State 1: No fracture	12.0406
30	0.468557	State 1: No fracture	12.4706
31	0.481007	State 1: No fracture	12.9006
32	0.49324	State 1: No fracture	13.3306
33	0.505258	State 1: No fracture	13.7606
34	0.517063	State 1: No fracture	14.1907
35	0.528658	State 1: No fracture	14.6207
36	0.540043	State 1: No fracture	15.0507
37	0.55122	State 1: No fracture	15.4807
38	0.562191	State 1: No fracture	15.9107
39	0.572958	State 1: No fracture	16.3408
40	0.583522	State 1: No fracture	16.7708
41	0.593885	State 1: No fracture	17.2008
42	0.604049	State 1: No fracture	17.6308
43	0.614016	State 1: No fracture	18.0608
44	0.623786	State 1: No fracture	18.4909
45	0.633363	State 1: No fracture	18.9209
46	0.642748	State 1: No fracture	19.3509
47	0.651942	State 1: No fracture	19.7809
48	0.660949	State 1: No fracture	20.2109
49	0.669769	State 1: No fracture	20.641
50	0.678404	State 1: No fracture	21.071
51	0.686858	State 1: No fracture	21.501
52	0	State 2: Initial fracture	0
53	0.0248052	State 2: Initial fracture	0.43002
54	0.0490944	State 2: Initial fracture	0.86004
55	0.072934	State 2: Initial fracture	1.29006
56	0.0963762	State 2: Initial fracture	1.72008
57	0.119461	State 2: Initial fracture	2.1501
58	0.142219	State 2: Initial fracture	2.58012
59	0.164671	State 2: Initial fracture	3.01014
60	0.186833	State 2: Initial fracture	3.44016
61	0.208712	State 2: Initial fracture	3.87018
62	0.230315	State 2: Initial fracture	4.3002
63	0.25164	State 2: Initial fracture	4.73022
64	0.272685	State 2: Initial fracture	5.16024
65	0.293447	State 2: Initial fracture	5.59026
66	0.313918	State 2: Initial fracture	6.02028
67	0.334092	State 2: Initial fracture	6.4503
68	0.35396	State 2: Initial fracture	6.88032
69	0.373513	State 2: Initial fracture	7.31034
70	0.392743	State 2: Initial fracture	7.74036
71	0.411641	State 2: Initial fracture	8.17038
72	0.4302	State 2: Initial fracture	8.6004
73	0.44841	State 2: Initial fracture	9.03042
74	0.466265	State 2: Initial fracture	9.46044
75	0.483759	State 2: Initial fracture	9.89046
76	0.500886	State 2: Initial fracture	10.3205
77	0.51764	State 2: Initial fracture	10.7505
78	0.534018	State 2: Initial fracture	11.1805
79	0.550016	State 2: Initial fracture	11.6105
80	0.565631	State 2: Initial fracture	12.0406
81	0.580863	State 2: Initial fracture	12.4706
82	0.59571	State 2: Initial fracture	12.9006
83	0.610172	State 2: Initial fracture	13.3306
84	0.624249	State 2: Initial fracture	13.7606
85	0.637944	State 2: Initial fracture	14.1907
86	0.651257	State 2: Initial fracture	14.6207
87	0.664192	State 2: Initial fracture	15.0507
88	0.676752	State 2: Initial fracture	15.4807
89	0.688941	State 2: Initial fracture	15.9107
90	0.700763	State 2: Initial fracture	16.3408
91	0.712222	State 2: Initial fracture	16.7708
92	0.723324	State 2: Initial fracture	17.2008
93	0.734075	State 2: Initial fracture	17.6308
94	0.744479	State 2: Initial fracture	18.0608
95	0.754545	State 2: Initial fracture	18.4909
96	0.764276	State 2: Initial fracture	18.9209
97	0.773682	State 2: Initial fracture	19.3509
98	0.782768	State 2: Initial fracture	19.7809
99	0.791541	State 2: Initial fracture	20.2109
100	0.800009	State 2: Initial fracture	20.641
101	0.808178	State 2: Initial fracture	21.071
102	0.816057	State 2: Initial fracture	21.501
103	0	State 3: Second fracture	0
104	0.0272014	State 3: Second fracture	0.43002
105	0.0560481	State 3: Second fracture	0.86004
106	0.086124	State 3: Second fracture	1.29006
107	0.117068	State 3: Second fracture	1.72008
108	0.148568	State 3: Second fracture	2.1501
109	0.180356	State 3: Second fracture	2.58012
110	0.212202	State 3: Second fracture	3.01014
111	0.243909	State 3: Second fracture	3.44016
112	0.275313	State 3: Second fracture	3.87018
113	0.306273	State 3: Second fracture	4.3002
114	0.336675	State 3: Second fracture	4.73022
115	0.366422	State 3: Second fracture	5.16024
116	0.395439	State 3: Second fracture	5.59026
117	0.423664	State 3: Second fracture	6.02028
118	0.45105	State 3: Second fracture	6.4503
119	0.477561	State 3: Second fracture	6.88032
120	0.503172	State 3: Second fracture	7.31034
121	0.527869	State 3: Second fracture	7.74036
122	0.551642	State 3: Second fracture	8.17038
123	0.57449	State 3: Second fracture	8.6004
124	0.596417	State 3: Second fracture	9.03042
125	0.617433	State 3: Second fracture	9.46044
126	0.63755	State 3: Second fracture	9.89046
127	0.656784	State 3: Second fracture	10.3205
128	0.675156	State 3: Second fracture	10.7505
129	0.692685	State 3: Second fracture	11.1805
130	0.709395	State 3: Second fracture	11.6105
131	0.725311	State 3: Second fracture	12.0406
132	0.740458	State 3: Second fracture	12.4706
133	0.754862	State 3: Second fracture	12.9006
134	0.76855	State 3: Second fracture	13.3306
135	0.781548	State 3: Second fracture	13.7606
136	0.793883	State 3: Second fracture	14.1907
137	0.805583	State 3: Second fracture	14.6207
138	0.816673	State 3: Second fracture	15.0507
139	0.82718	State 3: Second fracture	15.4807
140	0.837129	State 3: Second fracture	15.9107
141	0.846545	State 3: Second fracture	16.3408
142	0.855453	State 3: Second fracture	16.7708
143	0.863877	State 3: Second fracture	17.2008
144	0.871839	State 3: Second fracture	17.6308
145	0.879362	State 3: Second fracture	18.0608
146	0.886467	State 3: Second fracture	18.4909
147	0.893176	State 3: Second fracture	18.9209
148	0.899507	State 3: Second fracture	19.3509
149	0.905481	State 3: Second fracture	19.7809
150	0.911116	State 3: Second fracture	20.2109
151	0.91643	State 3: Second fracture	20.641
152	0.921439	State 3: Second fracture	21.071
153	0.926159	State 3: Second fracture	21.501
154	0	State 4: Third & further fracture	0
155	0.0912315	State 4: Third & further fracture	0.43002
156	0.17414	State 4: Third & further fracture	0.86004
157	0.249484	State 4: Third & further fracture	1.29006
158	0.317955	State 4: Third & further fracture	1.72008
159	0.380179	State 4: Third & further fracture	2.1501
160	0.436726	State 4: Third & further fracture	2.58012
161	0.488115	State 4: Third & further fracture	3.01014
162	0.534815	State 4: Third & further fracture	3.44016
163	0.577254	State 4: Third & further fracture	3.87018
164	0.615822	State 4: Third & further fracture	4.3002
165	0.650871	State 4: Third & further fracture	4.73022
166	0.682723	State 4: Third & further fracture	5.16024
167	0.711668	State 4: Third & further fracture	5.59026
168	0.737973	State 4: Third & further fracture	6.02028
169	0.761878	State 4: Third & further fracture	6.4503
170	0.783603	State 4: Third & further fracture	6.88032
171	0.803345	State 4: Third & further fracture	7.31034
172	0.821286	State 4: Third & further fracture	7.74036
173	0.83759	State 4: Third & further fracture	8.17038
174	0.852407	State 4: Third & further fracture	8.6004
175	0.865872	State 4: Third & further fracture	9.03042
176	0.878109	State 4: Third & further fracture	9.46044
177	0.889229	State 4: Third & further fracture	9.89046
178	0.899335	State 4: Third & further fracture	10.3205
179	0.908519	State 4: Third & further fracture	10.7505
180	0.916865	State 4: Third & further fracture	11.1805
181	0.924449	State 4: Third & further fracture	11.6105
182	0.931342	State 4: Third & further fracture	12.0406
183	0.937606	State 4: Third & further fracture	12.4706
184	0.943298	State 4: Third & further fracture	12.9006
185	0.948471	State 4: Third & further fracture	13.3306
186	0.953172	State 4: Third & further fracture	13.7606
187	0.957444	State 4: Third & further fracture	14.1907
188	0.961327	State 4: Third & further fracture	14.6207
189	0.964855	State 4: Third & further fracture	15.0507
190	0.968061	State 4: Third & further fracture	15.4807
191	0.970975	State 4: Third & further fracture	15.9107
192	0.973623	State 4: Third & further fracture	16.3408
193	0.97603	State 4: Third & further fracture	16.7708
194	0.978216	State 4: Third & further fracture	17.2008
195	0.980204	State 4: Third & further fracture	17.6308
196	0.98201	State 4: Third & further fracture	18.0608
197	0.983651	State 4: Third & further fracture	18.4909
198	0.985143	State 4: Third & further fracture	18.9209
199	0.986498	State 4: Third & further fracture	19.3509
200	0.98773	State 4: Third & further fracture	19.7809
201	0.988849	State 4: Third & further fracture	20.2109
202	0.989867	State 4: Third & further fracture	20.641
203	0.990791	State 4: Third & further fracture	21.071
204	0.991631	State 4: Third & further fracture	21.501

## Sheet: Men, Age = 70, T-score = -1.5
	survival.prob	state	times
1	0	State 1: No fracture	0
2	0.0137327	State 1: No fracture	0.43002
3	0.0273363	State 1: No fracture	0.86004
4	0.0408162	State 1: No fracture	1.29006
5	0.0541769	State 1: No fracture	1.72008
6	0.0674227	State 1: No fracture	2.1501
7	0.0805572	State 1: No fracture	2.58012
8	0.0935834	State 1: No fracture	3.01014
9	0.106504	State 1: No fracture	3.44016
10	0.119321	State 1: No fracture	3.87018
11	0.132036	State 1: No fracture	4.3002
12	0.144649	State 1: No fracture	4.73022
13	0.157163	State 1: No fracture	5.16024
14	0.169576	State 1: No fracture	5.59026
15	0.18189	State 1: No fracture	6.02028
16	0.194103	State 1: No fracture	6.4503
17	0.206216	State 1: No fracture	6.88032
18	0.218228	State 1: No fracture	7.31034
19	0.230137	State 1: No fracture	7.74036
20	0.241944	State 1: No fracture	8.17038
21	0.253646	State 1: No fracture	8.6004
22	0.265243	State 1: No fracture	9.03042
23	0.276734	State 1: No fracture	9.46044
24	0.288117	State 1: No fracture	9.89046
25	0.299391	State 1: No fracture	10.3205
26	0.310555	State 1: No fracture	10.7505
27	0.321607	State 1: No fracture	11.1805
28	0.332547	State 1: No fracture	11.6105
29	0.343373	State 1: No fracture	12.0406
30	0.354084	State 1: No fracture	12.4706
31	0.36468	State 1: No fracture	12.9006
32	0.375159	State 1: No fracture	13.3306
33	0.38552	State 1: No fracture	13.7606
34	0.395762	State 1: No fracture	14.1907
35	0.405885	State 1: No fracture	14.6207
36	0.415889	State 1: No fracture	15.0507
37	0.425772	State 1: No fracture	15.4807
38	0.435533	State 1: No fracture	15.9107
39	0.445174	State 1: No fracture	16.3408
40	0.454693	State 1: No fracture	16.7708
41	0.46409	State 1: No fracture	17.2008
42	0.473365	State 1: No fracture	17.6308
43	0.482518	State 1: No fracture	18.0608
44	0.491548	State 1: No fracture	18.4909
45	0.500457	State 1: No fracture	18.9209
46	0.509243	State 1: No fracture	19.3509
47	0.517908	State 1: No fracture	19.7809
48	0.526452	State 1: No fracture	20.2109
49	0.534875	State 1: No fracture	20.641
50	0.543177	State 1: No fracture	21.071
51	0.551359	State 1: No fracture	21.501
52	0	State 2: Initial fracture	0
53	0.0216439	State 2: Initial fracture	0.43002
54	0.0436654	State 2: Initial fracture	0.86004
55	0.0660136	State 2: Initial fracture	1.29006
56	0.088629	State 2: Initial fracture	1.72008
57	0.111448	State 2: Initial fracture	2.1501
58	0.134403	State 2: Initial fracture	2.58012
59	0.157428	State 2: Initial fracture	3.01014
60	0.18046	State 2: Initial fracture	3.44016
61	0.203436	State 2: Initial fracture	3.87018
62	0.226297	State 2: Initial fracture	4.3002
63	0.24899	State 2: Initial fracture	4.73022
64	0.271466	State 2: Initial fracture	5.16024
65	0.293679	State 2: Initial fracture	5.59026
66	0.315589	State 2: Initial fracture	6.02028
67	0.337161	State 2: Initial fracture	6.4503
68	0.358363	State 2: Initial fracture	6.88032
69	0.379169	State 2: Initial fracture	7.31034
70	0.399557	State 2: Initial fracture	7.74036
71	0.419506	State 2: Initial fracture	8.17038
72	0.439002	State 2: Initial fracture	8.6004
73	0.458032	State 2: Initial fracture	9.03042
74	0.476588	State 2: Initial fracture	9.46044
75	0.494661	State 2: Initial fracture	9.89046
76	0.51225	State 2: Initial fracture	10.3205
77	0.529351	State 2: Initial fracture	10.7505
78	0.545964	State 2: Initial fracture	11.1805
79	0.562091	State 2: Initial fracture	11.6105
80	0.577736	State 2: Initial fracture	12.0406
81	0.592903	State 2: Initial fracture	12.4706
82	0.607598	State 2: Initial fracture	12.9006
83	0.621828	State 2: Initial fracture	13.3306
84	0.6356	State 2: Initial fracture	13.7606
85	0.648922	State 2: Initial fracture	14.1907
86	0.661804	State 2: Initial fracture	14.6207
87	0.674255	State 2: Initial fracture	15.0507
88	0.686285	State 2: Initial fracture	15.4807
89	0.697904	State 2: Initial fracture	15.9107
90	0.709122	State 2: Initial fracture	16.3408
91	0.71995	State 2: Initial fracture	16.7708
92	0.730399	State 2: Initial fracture	17.2008
93	0.740479	State 2: Initial fracture	17.6308
94	0.750201	State 2: Initial fracture	18.0608
95	0.759575	State 2: Initial fracture	18.4909
96	0.768613	State 2: Initial fracture	18.9209
97	0.777324	State 2: Initial fracture	19.3509
98	0.785719	State 2: Initial fracture	19.7809
99	0.793808	State 2: Initial fracture	20.2109
100	0.8016	State 2: Initial fracture	20.641
101	0.809107	State 2: Initial fracture	21.071
102	0.816337	State 2: Initial fracture	21.501
103	0	State 3: Second fracture	0
104	0.070567	State 3: Second fracture	0.43002
105	0.139404	State 3: Second fracture	0.86004
106	0.205801	State 3: Second fracture	1.29006
107	0.269258	State 3: Second fracture	1.72008
108	0.329442	State 3: Second fracture	2.1501
109	0.386155	State 3: Second fracture	2.58012
110	0.439303	State 3: Second fracture	3.01014
111	0.48887	State 3: Second fracture	3.44016
112	0.534906	State 3: Second fracture	3.87018
113	0.577506	State 3: Second fracture	4.3002
114	0.616796	State 3: Second fracture	4.73022
115	0.652928	State 3: Second fracture	5.16024
116	0.686069	State 3: Second fracture	5.59026
117	0.716394	State 3: Second fracture	6.02028
118	0.744084	State 3: Second fracture	6.4503
119	0.769316	State 3: Second fracture	6.88032
120	0.792269	State 3: Second fracture	7.31034
121	0.813113	State 3: Second fracture	7.74036
122	0.832014	State 3: Second fracture	8.17038
123	0.849128	State 3: Second fracture	8.6004
124	0.864605	State 3: Second fracture	9.03042
125	0.878583	State 3: Second fracture	9.46044
126	0.891195	State 3: Second fracture	9.89046
127	0.90256	State 3: Second fracture	10.3205
128	0.912793	State 3: Second fracture	10.7505
129	0.921998	State 3: Second fracture	11.1805
130	0.93027	State 3: Second fracture	11.6105
131	0.937699	State 3: Second fracture	12.0406
132	0.944364	State 3: Second fracture	12.4706
133	0.950341	State 3: Second fracture	12.9006
134	0.955696	State 3: Second fracture	13.3306
135	0.960491	State 3: Second fracture	13.7606
136	0.964782	State 3: Second fracture	14.1907
137	0.96862	State 3: Second fracture	14.6207
138	0.972051	State 3: Second fracture	15.0507
139	0.975115	State 3: Second fracture	15.4807
140	0.977852	State 3: Second fracture	15.9107
141	0.980294	State 3: Second fracture	16.3408
142	0.982473	State 3: Second fracture	16.7708
143	0.984416	State 3: Second fracture	17.2008
144	0.986148	State 3: Second fracture	17.6308
145	0.987691	State 3: Second fracture	18.0608
146	0.989065	State 3: Second fracture	18.4909
147	0.990288	State 3: Second fracture	18.9209
148	0.991377	State 3: Second fracture	19.3509
149	0.992346	State 3: Second fracture	19.7809
150	0.993207	State 3: Second fracture	20.2109
151	0.993973	State 3: Second fracture	20.641
152	0.994654	State 3: Second fracture	21.071
153	0.995259	State 3: Second fracture	21.501
154	0	State 4: Third & further fracture	0
155	0.135521	State 4: Third & further fracture	0.43002
156	0.252676	State 4: Third & further fracture	0.86004
157	0.353955	State 4: Third & further fracture	1.29006
158	0.441507	State 4: Third & further fracture	1.72008
159	0.517195	State 4: Third & further fracture	2.1501
160	0.582625	State 4: Third & further fracture	2.58012
161	0.639188	State 4: Third & further fracture	3.01014
162	0.688086	State 4: Third & further fracture	3.44016
163	0.730357	State 4: Third & further fracture	3.87018
164	0.766899	State 4: Third & further fracture	4.3002
165	0.798489	State 4: Third & further fracture	4.73022
166	0.825798	State 4: Third & further fracture	5.16024
167	0.849406	State 4: Third & further fracture	5.59026
168	0.869815	State 4: Third & further fracture	6.02028
169	0.887458	State 4: Third & further fracture	6.4503
170	0.90271	State 4: Third & further fracture	6.88032
171	0.915895	State 4: Third & further fracture	7.31034
172	0.927293	State 4: Third & further fracture	7.74036
173	0.937146	State 4: Third & further fracture	8.17038
174	0.945664	State 4: Third & further fracture	8.6004
175	0.953028	State 4: Third & further fracture	9.03042
176	0.959393	State 4: Third & further fracture	9.46044
177	0.964897	State 4: Third & further fracture	9.89046
178	0.969654	State 4: Third & further fracture	10.3205
179	0.973766	State 4: Third & further fracture	10.7505
180	0.977322	State 4: Third & further fracture	11.1805
181	0.980395	State 4: Third & further fracture	11.6105
182	0.983052	State 4: Third & further fracture	12.0406
183	0.985349	State 4: Third & further fracture	12.4706
184	0.987334	State 4: Third & further fracture	12.9006
185	0.989051	State 4: Third & further fracture	13.3306
186	0.990535	State 4: Third & further fracture	13.7606
187	0.991817	State 4: Third & further fracture	14.1907
188	0.992926	State 4: Third & further fracture	14.6207
189	0.993885	State 4: Third & further fracture	15.0507
190	0.994714	State 4: Third & further fracture	15.4807
191	0.99543	State 4: Third & further fracture	15.9107
192	0.996049	State 4: Third & further fracture	16.3408
193	0.996585	State 4: Third & further fracture	16.7708
194	0.997048	State 4: Third & further fracture	17.2008
195	0.997448	State 4: Third & further fracture	17.6308
196	0.997794	State 4: Third & further fracture	18.0608
197	0.998093	State 4: Third & further fracture	18.4909
198	0.998351	State 4: Third & further fracture	18.9209
199	0.998575	State 4: Third & further fracture	19.3509
200	0.998768	State 4: Third & further fracture	19.7809
201	0.998935	State 4: Third & further fracture	20.2109
202	0.999079	State 4: Third & further fracture	20.641
203	0.999204	State 4: Third & further fracture	21.071
204	0.999312	State 4: Third & further fracture	21.501

## Sheet: Men, Age = 70, T-score = -2.5
	survival.prob	state	times
1	0	State 1: No fracture	0
2	0.014365	State 1: No fracture	0.43002
3	0.028652	State 1: No fracture	0.86004
4	0.0428724	State 1: No fracture	1.29006
5	0.0570349	State 1: No fracture	1.72008
6	0.0711455	State 1: No fracture	2.1501
7	0.0852081	State 1: No fracture	2.58012
8	0.0992248	State 1: No fracture	3.01014
9	0.113196	State 1: No fracture	3.44016
10	0.127121	State 1: No fracture	3.87018
11	0.140997	State 1: No fracture	4.3002
12	0.154822	State 1: No fracture	4.73022
13	0.168592	State 1: No fracture	5.16024
14	0.182303	State 1: No fracture	5.59026
15	0.195949	State 1: No fracture	6.02028
16	0.209526	State 1: No fracture	6.4503
17	0.223028	State 1: No fracture	6.88032
18	0.236451	State 1: No fracture	7.31034
19	0.249788	State 1: No fracture	7.74036
20	0.263033	State 1: No fracture	8.17038
21	0.276182	State 1: No fracture	8.6004
22	0.289229	State 1: No fracture	9.03042
23	0.302169	State 1: No fracture	9.46044
24	0.314996	State 1: No fracture	9.89046
25	0.327706	State 1: No fracture	10.3205
26	0.340294	State 1: No fracture	10.7505
27	0.352755	State 1: No fracture	11.1805
28	0.365087	State 1: No fracture	11.6105
29	0.377284	State 1: No fracture	12.0406
30	0.389343	State 1: No fracture	12.4706
31	0.40126	State 1: No fracture	12.9006
32	0.413034	State 1: No fracture	13.3306
33	0.42466	State 1: No fracture	13.7606
34	0.436137	State 1: No fracture	14.1907
35	0.447462	State 1: No fracture	14.6207
36	0.458633	State 1: No fracture	15.0507
37	0.469648	State 1: No fracture	15.4807
38	0.480506	State 1: No fracture	15.9107
39	0.491206	State 1: No fracture	16.3408
40	0.501746	State 1: No fracture	16.7708
41	0.512126	State 1: No fracture	17.2008
42	0.522345	State 1: No fracture	17.6308
43	0.532402	State 1: No fracture	18.0608
44	0.542298	State 1: No fracture	18.4909
45	0.552032	State 1: No fracture	18.9209
46	0.561605	State 1: No fracture	19.3509
47	0.571016	State 1: No fracture	19.7809
48	0.580266	State 1: No fracture	20.2109
49	0.589357	State 1: No fracture	20.641
50	0.598287	State 1: No fracture	21.071
51	0.607059	State 1: No fracture	21.501
52	0	State 2: Initial fracture	0
53	0.0254627	State 2: Initial fracture	0.43002
54	0.0519333	State 2: Initial fracture	0.86004
55	0.0791575	State 2: Initial fracture	1.29006
56	0.10691	State 2: Initial fracture	1.72008
57	0.134992	State 2: Initial fracture	2.1501
58	0.163229	State 2: Initial fracture	2.58012
59	0.191468	State 2: Initial fracture	3.01014
60	0.219577	State 2: Initial fracture	3.44016
61	0.247443	State 2: Initial fracture	3.87018
62	0.274968	State 2: Initial fracture	4.3002
63	0.302068	State 2: Initial fracture	4.73022
64	0.328675	State 2: Initial fracture	5.16024
65	0.354731	State 2: Initial fracture	5.59026
66	0.380188	State 2: Initial fracture	6.02028
67	0.40501	State 2: Initial fracture	6.4503
68	0.429166	State 2: Initial fracture	6.88032
69	0.452635	State 2: Initial fracture	7.31034
70	0.475401	State 2: Initial fracture	7.74036
71	0.497453	State 2: Initial fracture	8.17038
72	0.518787	State 2: Initial fracture	8.6004
73	0.539401	State 2: Initial fracture	9.03042
74	0.559299	State 2: Initial fracture	9.46044
75	0.578484	State 2: Initial fracture	9.89046
76	0.596968	State 2: Initial fracture	10.3205
77	0.614758	State 2: Initial fracture	10.7505
78	0.631869	State 2: Initial fracture	11.1805
79	0.648314	State 2: Initial fracture	11.6105
80	0.664109	State 2: Initial fracture	12.0406
81	0.679269	State 2: Initial fracture	12.4706
82	0.693813	State 2: Initial fracture	12.9006
83	0.707757	State 2: Initial fracture	13.3306
84	0.721119	State 2: Initial fracture	13.7606
85	0.733918	State 2: Initial fracture	14.1907
86	0.746173	State 2: Initial fracture	14.6207
87	0.757901	State 2: Initial fracture	15.0507
88	0.769121	State 2: Initial fracture	15.4807
89	0.779852	State 2: Initial fracture	15.9107
90	0.790112	State 2: Initial fracture	16.3408
91	0.799917	State 2: Initial fracture	16.7708
92	0.809286	State 2: Initial fracture	17.2008
93	0.818236	State 2: Initial fracture	17.6308
94	0.826783	State 2: Initial fracture	18.0608
95	0.834944	State 2: Initial fracture	18.4909
96	0.842734	State 2: Initial fracture	18.9209
97	0.850169	State 2: Initial fracture	19.3509
98	0.857264	State 2: Initial fracture	19.7809
99	0.864032	State 2: Initial fracture	20.2109
100	0.870488	State 2: Initial fracture	20.641
101	0.876646	State 2: Initial fracture	21.071
102	0.882518	State 2: Initial fracture	21.501
103	0	State 3: Second fracture	0
104	0.097088	State 3: Second fracture	0.43002
105	0.185345	State 3: Second fracture	0.86004
106	0.265469	State 3: Second fracture	1.29006
107	0.338122	State 3: Second fracture	1.72008
108	0.403927	State 3: Second fracture	2.1501
109	0.463472	State 3: Second fracture	2.58012
110	0.517303	State 3: Second fracture	3.01014
111	0.565928	State 3: Second fracture	3.44016
112	0.609816	State 3: Second fracture	3.87018
113	0.649401	State 3: Second fracture	4.3002
114	0.685082	State 3: Second fracture	4.73022
115	0.717225	State 3: Second fracture	5.16024
116	0.746165	State 3: Second fracture	5.59026
117	0.772208	State 3: Second fracture	6.02028
118	0.795633	State 3: Second fracture	6.4503
119	0.816694	State 3: Second fracture	6.88032
120	0.835622	State 3: Second fracture	7.31034
121	0.852627	State 3: Second fracture	7.74036
122	0.867898	State 3: Second fracture	8.17038
123	0.881609	State 3: Second fracture	8.6004
124	0.893915	State 3: Second fracture	9.03042
125	0.904957	State 3: Second fracture	9.46044
126	0.914863	State 3: Second fracture	9.89046
127	0.923746	State 3: Second fracture	10.3205
128	0.931712	State 3: Second fracture	10.7505
129	0.938853	State 3: Second fracture	11.1805
130	0.945253	State 3: Second fracture	11.6105
131	0.950988	State 3: Second fracture	12.0406
132	0.956127	State 3: Second fracture	12.4706
133	0.960731	State 3: Second fracture	12.9006
134	0.964855	State 3: Second fracture	13.3306
135	0.968548	State 3: Second fracture	13.7606
136	0.971855	State 3: Second fracture	14.1907
137	0.974816	State 3: Second fracture	14.6207
138	0.977467	State 3: Second fracture	15.0507
139	0.97984	State 3: Second fracture	15.4807
140	0.981965	State 3: Second fracture	15.9107
141	0.983866	State 3: Second fracture	16.3408
142	0.985567	State 3: Second fracture	16.7708
143	0.98709	State 3: Second fracture	17.2008
144	0.988453	State 3: Second fracture	17.6308
145	0.989672	State 3: Second fracture	18.0608
146	0.990763	State 3: Second fracture	18.4909
147	0.991739	State 3: Second fracture	18.9209
148	0.992612	State 3: Second fracture	19.3509
149	0.993393	State 3: Second fracture	19.7809
150	0.994091	State 3: Second fracture	20.2109
151	0.994716	State 3: Second fracture	20.641
152	0.995275	State 3: Second fracture	21.071
153	0.995775	State 3: Second fracture	21.501
154	0	State 4: Third & further fracture	0
155	0.10611	State 4: Third & further fracture	0.43002
156	0.20096	State 4: Third & further fracture	0.86004
157	0.285746	State 4: Third & further fracture	1.29006
158	0.361536	State 4: Third & further fracture	1.72008
159	0.429283	State 4: Third & further fracture	2.1501
160	0.489842	State 4: Third & further fracture	2.58012
161	0.543975	State 4: Third & further fracture	3.01014
162	0.592364	State 4: Third & further fracture	3.44016
163	0.635618	State 4: Third & further fracture	3.87018
164	0.674282	State 4: Third & further fracture	4.3002
165	0.708844	State 4: Third & further fracture	4.73022
166	0.739739	State 4: Third & further fracture	5.16024
167	0.767355	State 4: Third & further fracture	5.59026
168	0.792041	State 4: Third & further fracture	6.02028
169	0.814107	State 4: Third & further fracture	6.4503
170	0.833833	State 4: Third & further fracture	6.88032
171	0.851465	State 4: Third & further fracture	7.31034
172	0.867226	State 4: Third & further fracture	7.74036
173	0.881314	State 4: Third & further fracture	8.17038
174	0.893908	State 4: Third & further fracture	8.6004
175	0.905165	State 4: Third & further fracture	9.03042
176	0.915228	State 4: Third & further fracture	9.46044
177	0.924223	State 4: Third & further fracture	9.89046
178	0.932264	State 4: Third & further fracture	10.3205
179	0.939452	State 4: Third & further fracture	10.7505
180	0.945876	State 4: Third & further fracture	11.1805
181	0.951619	State 4: Third & further fracture	11.6105
182	0.956753	State 4: Third & further fracture	12.0406
183	0.961342	State 4: Third & further fracture	12.4706
184	0.965444	State 4: Third & further fracture	12.9006
185	0.969111	State 4: Third & further fracture	13.3306
186	0.972388	State 4: Third & further fracture	13.7606
187	0.975318	State 4: Third & further fracture	14.1907
188	0.977937	State 4: Third & further fracture	14.6207
189	0.980278	State 4: Third & further fracture	15.0507
190	0.982371	State 4: Third & further fracture	15.4807
191	0.984242	State 4: Third & further fracture	15.9107
192	0.985914	State 4: Third & further fracture	16.3408
193	0.987408	State 4: Third & further fracture	16.7708
194	0.988744	State 4: Third & further fracture	17.2008
195	0.989939	State 4: Third & further fracture	17.6308
196	0.991006	State 4: Third & further fracture	18.0608
197	0.991961	State 4: Third & further fracture	18.4909
198	0.992814	State 4: Third & further fracture	18.9209
199	0.993576	State 4: Third & further fracture	19.3509
200	0.994258	State 4: Third & further fracture	19.7809
201	0.994867	State 4: Third & further fracture	20.2109
202	0.995412	State 4: Third & further fracture	20.641
203	0.995899	State 4: Third & further fracture	21.071
204	0.996334	State 4: Third & further fracture	21.501

## Sheet: Men, Age = 80, T-score = -1.5
	survival.prob	state	times
1	0	State 1: No fracture	0
2	0.0362869	State 1: No fracture	0.43002
3	0.071484	State 1: No fracture	0.86004
4	0.105629	State 1: No fracture	1.29006
5	0.138752	State 1: No fracture	1.72008
6	0.170879	State 1: No fracture	2.1501
7	0.202033	State 1: No fracture	2.58012
8	0.232234	State 1: No fracture	3.01014
9	0.2615	State 1: No fracture	3.44016
10	0.289848	State 1: No fracture	3.87018
11	0.317295	State 1: No fracture	4.3002
12	0.343857	State 1: No fracture	4.73022
13	0.36955	State 1: No fracture	5.16024
14	0.394391	State 1: No fracture	5.59026
15	0.418396	State 1: No fracture	6.02028
16	0.441583	State 1: No fracture	6.4503
17	0.463968	State 1: No fracture	6.88032
18	0.48557	State 1: No fracture	7.31034
19	0.506406	State 1: No fracture	7.74036
20	0.526496	State 1: No fracture	8.17038
21	0.545857	State 1: No fracture	8.6004
22	0.564509	State 1: No fracture	9.03042
23	0.582471	State 1: No fracture	9.46044
24	0.599762	State 1: No fracture	9.89046
25	0.616401	State 1: No fracture	10.3205
26	0.632407	State 1: No fracture	10.7505
27	0.6478	State 1: No fracture	11.1805
28	0.662597	State 1: No fracture	11.6105
29	0.676819	State 1: No fracture	12.0406
30	0.690483	State 1: No fracture	12.4706
31	0.703608	State 1: No fracture	12.9006
32	0.716211	State 1: No fracture	13.3306
33	0.728311	State 1: No fracture	13.7606
34	0.739925	State 1: No fracture	14.1907
35	0.751069	State 1: No fracture	14.6207
36	0.761761	State 1: No fracture	15.0507
37	0.772017	State 1: No fracture	15.4807
38	0.781852	State 1: No fracture	15.9107
39	0.791282	State 1: No fracture	16.3408
40	0.800322	State 1: No fracture	16.7708
41	0.808987	State 1: No fracture	17.2008
42	0.817291	State 1: No fracture	17.6308
43	0.825248	State 1: No fracture	18.0608
44	0.83287	State 1: No fracture	18.4909
45	0.840172	State 1: No fracture	18.9209
46	0.847165	State 1: No fracture	19.3509
47	0.853862	State 1: No fracture	19.7809
48	0.860275	State 1: No fracture	20.2109
49	0.866414	State 1: No fracture	20.641
50	0.872291	State 1: No fracture	21.071
51	0.877916	State 1: No fracture	21.501
52	0	State 2: Initial fracture	0
53	0.0598067	State 2: Initial fracture	0.43002
54	0.118598	State 2: Initial fracture	0.86004
55	0.175812	State 2: Initial fracture	1.29006
56	0.231027	State 2: Initial fracture	1.72008
57	0.283938	State 2: Initial fracture	2.1501
58	0.33434	State 2: Initial fracture	2.58012
59	0.382111	State 2: Initial fracture	3.01014
60	0.427194	State 2: Initial fracture	3.44016
61	0.469584	State 2: Initial fracture	3.87018
62	0.509318	State 2: Initial fracture	4.3002
63	0.54646	State 2: Initial fracture	4.73022
64	0.5811	State 2: Initial fracture	5.16024
65	0.613342	State 2: Initial fracture	5.59026
66	0.6433	State 2: Initial fracture	6.02028
67	0.671095	State 2: Initial fracture	6.4503
68	0.69685	State 2: Initial fracture	6.88032
69	0.720689	State 2: Initial fracture	7.31034
70	0.742734	State 2: Initial fracture	7.74036
71	0.763102	State 2: Initial fracture	8.17038
72	0.781908	State 2: Initial fracture	8.6004
73	0.799261	State 2: Initial fracture	9.03042
74	0.815266	State 2: Initial fracture	9.46044
75	0.830019	State 2: Initial fracture	9.89046
76	0.843615	State 2: Initial fracture	10.3205
77	0.856138	State 2: Initial fracture	10.7505
78	0.867672	State 2: Initial fracture	11.1805
79	0.87829	State 2: Initial fracture	11.6105
80	0.888064	State 2: Initial fracture	12.0406
81	0.89706	State 2: Initial fracture	12.4706
82	0.905337	State 2: Initial fracture	12.9006
83	0.912953	State 2: Initial fracture	13.3306
84	0.919959	State 2: Initial fracture	13.7606
85	0.926403	State 2: Initial fracture	14.1907
86	0.932331	State 2: Initial fracture	14.6207
87	0.937782	State 2: Initial fracture	15.0507
88	0.942796	State 2: Initial fracture	15.4807
89	0.947406	State 2: Initial fracture	15.9107
90	0.951646	State 2: Initial fracture	16.3408
91	0.955544	State 2: Initial fracture	16.7708
92	0.959129	State 2: Initial fracture	17.2008
93	0.962424	State 2: Initial fracture	17.6308
94	0.965455	State 2: Initial fracture	18.0608
95	0.968241	State 2: Initial fracture	18.4909
96	0.970803	State 2: Initial fracture	18.9209
97	0.973158	State 2: Initial fracture	19.3509
98	0.975323	State 2: Initial fracture	19.7809
99	0.977314	State 2: Initial fracture	20.2109
100	0.979144	State 2: Initial fracture	20.641
101	0.980826	State 2: Initial fracture	21.071
102	0.982373	State 2: Initial fracture	21.501
103	0	State 3: Second fracture	0
104	0.180821	State 3: Second fracture	0.43002
105	0.331617	State 3: Second fracture	0.86004
106	0.456568	State 3: Second fracture	1.29006
107	0.559535	State 3: Second fracture	1.72008
108	0.643985	State 3: Second fracture	2.1501
109	0.712962	State 3: Second fracture	2.58012
110	0.769096	State 3: Second fracture	3.01014
111	0.814632	State 3: Second fracture	3.44016
112	0.851465	State 3: Second fracture	3.87018
113	0.881181	State 3: Second fracture	4.3002
114	0.9051	State 3: Second fracture	4.73022
115	0.924313	State 3: Second fracture	5.16024
116	0.939716	State 3: Second fracture	5.59026
117	0.952043	State 3: Second fracture	6.02028
118	0.961892	State 3: Second fracture	6.4503
119	0.969751	State 3: Second fracture	6.88032
120	0.976012	State 3: Second fracture	7.31034
121	0.980995	State 3: Second fracture	7.74036
122	0.984956	State 3: Second fracture	8.17038
123	0.9881	State 3: Second fracture	8.6004
124	0.990595	State 3: Second fracture	9.03042
125	0.992572	State 3: Second fracture	9.46044
126	0.994137	State 3: Second fracture	9.89046
127	0.995375	State 3: Second fracture	10.3205
128	0.996354	State 3: Second fracture	10.7505
129	0.997127	State 3: Second fracture	11.1805
130	0.997738	State 3: Second fracture	11.6105
131	0.998219	State 3: Second fracture	12.0406
132	0.998599	State 3: Second fracture	12.4706
133	0.998898	State 3: Second fracture	12.9006
134	0.999134	State 3: Second fracture	13.3306
135	0.99932	State 3: Second fracture	13.7606
136	0.999466	State 3: Second fracture	14.1907
137	0.99958	State 3: Second fracture	14.6207
138	0.999671	State 3: Second fracture	15.0507
139	0.999742	State 3: Second fracture	15.4807
140	0.999797	State 3: Second fracture	15.9107
141	0.999841	State 3: Second fracture	16.3408
142	0.999875	State 3: Second fracture	16.7708
143	0.999902	State 3: Second fracture	17.2008
144	0.999924	State 3: Second fracture	17.6308
145	0.99994	State 3: Second fracture	18.0608
146	0.999953	State 3: Second fracture	18.4909
147	0.999963	State 3: Second fracture	18.9209
148	0.999971	State 3: Second fracture	19.3509
149	0.999977	State 3: Second fracture	19.7809
150	0.999982	State 3: Second fracture	20.2109
151	0.999986	State 3: Second fracture	20.641
152	0.999989	State 3: Second fracture	21.071
153	0.999992	State 3: Second fracture	21.501
154	0	State 4: Third & further fracture	0
155	0.221644	State 4: Third & further fracture	0.43002
156	0.394162	State 4: Third & further fracture	0.86004
157	0.528442	State 4: Third & further fracture	1.29006
158	0.63296	State 4: Third & further fracture	1.72008
159	0.714312	State 4: Third & further fracture	2.1501
160	0.777633	State 4: Third & further fracture	2.58012
161	0.826919	State 4: Third & further fracture	3.01014
162	0.865281	State 4: Third & further fracture	3.44016
163	0.895141	State 4: Third & further fracture	3.87018
164	0.918382	State 4: Third & further fracture	4.3002
165	0.936472	State 4: Third & further fracture	4.73022
166	0.950553	State 4: Third & further fracture	5.16024
167	0.961513	State 4: Third & further fracture	5.59026
168	0.970043	State 4: Third & further fracture	6.02028
169	0.976683	State 4: Third & further fracture	6.4503
170	0.981851	State 4: Third & further fracture	6.88032
171	0.985874	State 4: Third & further fracture	7.31034
172	0.989005	State 4: Third & further fracture	7.74036
173	0.991442	State 4: Third & further fracture	8.17038
174	0.993339	State 4: Third & further fracture	8.6004
175	0.994815	State 4: Third & further fracture	9.03042
176	0.995964	State 4: Third & further fracture	9.46044
177	0.996859	State 4: Third & further fracture	9.89046
178	0.997555	State 4: Third & further fracture	10.3205
179	0.998097	State 4: Third & further fracture	10.7505
180	0.998519	State 4: Third & further fracture	11.1805
181	0.998847	State 4: Third & further fracture	11.6105
182	0.999103	State 4: Third & further fracture	12.0406
183	0.999301	State 4: Third & further fracture	12.4706
184	0.999456	State 4: Third & further fracture	12.9006
185	0.999577	State 4: Third & further fracture	13.3306
186	0.999671	State 4: Third & further fracture	13.7606
187	0.999744	State 4: Third & further fracture	14.1907
188	0.9998	State 4: Third & further fracture	14.6207
189	0.999845	State 4: Third & further fracture	15.0507
190	0.999879	State 4: Third & further fracture	15.4807
191	0.999906	State 4: Third & further fracture	15.9107
192	0.999927	State 4: Third & further fracture	16.3408
193	0.999943	State 4: Third & further fracture	16.7708
194	0.999956	State 4: Third & further fracture	17.2008
195	0.999965	State 4: Third & further fracture	17.6308
196	0.999973	State 4: Third & further fracture	18.0608
197	0.999979	State 4: Third & further fracture	18.4909
198	0.999984	State 4: Third & further fracture	18.9209
199	0.999987	State 4: Third & further fracture	19.3509
200	0.99999	State 4: Third & further fracture	19.7809
201	0.999992	State 4: Third & further fracture	20.2109
202	0.999994	State 4: Third & further fracture	20.641
203	0.999995	State 4: Third & further fracture	21.071
204	0.999996	State 4: Third & further fracture	21.501

## Sheet: Men, Age = 80, T-score = -2.5
	survival.prob	state	times
1	0	State 1: No fracture	0
2	0.037973	State 1: No fracture	0.43002
3	0.0749819	State 1: No fracture	0.86004
4	0.11106	State 1: No fracture	1.29006
5	0.146218	State 1: No fracture	1.72008
6	0.180458	State 1: No fracture	2.1501
7	0.213772	State 1: No fracture	2.58012
8	0.246151	State 1: No fracture	3.01014
9	0.277587	State 1: No fracture	3.44016
10	0.308072	State 1: No fracture	3.87018
11	0.337603	State 1: No fracture	4.3002
12	0.366176	State 1: No fracture	4.73022
13	0.393794	State 1: No fracture	5.16024
14	0.42046	State 1: No fracture	5.59026
15	0.446183	State 1: No fracture	6.02028
16	0.470973	State 1: No fracture	6.4503
17	0.494841	State 1: No fracture	6.88032
18	0.517804	State 1: No fracture	7.31034
19	0.539877	State 1: No fracture	7.74036
20	0.56108	State 1: No fracture	8.17038
21	0.581433	State 1: No fracture	8.6004
22	0.600956	State 1: No fracture	9.03042
23	0.619671	State 1: No fracture	9.46044
24	0.637602	State 1: No fracture	9.89046
25	0.654771	State 1: No fracture	10.3205
26	0.671203	State 1: No fracture	10.7505
27	0.686921	State 1: No fracture	11.1805
28	0.701949	State 1: No fracture	11.6105
29	0.716311	State 1: No fracture	12.0406
30	0.730031	State 1: No fracture	12.4706
31	0.743133	State 1: No fracture	12.9006
32	0.75564	State 1: No fracture	13.3306
33	0.767575	State 1: No fracture	13.7606
34	0.778959	State 1: No fracture	14.1907
35	0.789816	State 1: No fracture	14.6207
36	0.800166	State 1: No fracture	15.0507
37	0.810031	State 1: No fracture	15.4807
38	0.819431	State 1: No fracture	15.9107
39	0.828385	State 1: No fracture	16.3408
40	0.836913	State 1: No fracture	16.7708
41	0.845033	State 1: No fracture	17.2008
42	0.852763	State 1: No fracture	17.6308
43	0.86012	State 1: No fracture	18.0608
44	0.867121	State 1: No fracture	18.4909
45	0.873783	State 1: No fracture	18.9209
46	0.88012	State 1: No fracture	19.3509
47	0.886147	State 1: No fracture	19.7809
48	0.891879	State 1: No fracture	20.2109
49	0.897329	State 1: No fracture	20.641
50	0.902511	State 1: No fracture	21.071
51	0.907437	State 1: No fracture	21.501
52	0	State 2: Initial fracture	0
53	0.0703621	State 2: Initial fracture	0.43002
54	0.140475	State 2: Initial fracture	0.86004
55	0.208618	State 2: Initial fracture	1.29006
56	0.273732	State 2: Initial fracture	1.72008
57	0.335211	State 2: Initial fracture	2.1501
58	0.392751	State 2: Initial fracture	2.58012
59	0.44625	State 2: Initial fracture	3.01014
60	0.495743	State 2: Initial fracture	3.44016
61	0.541351	State 2: Initial fracture	3.87018
62	0.583246	State 2: Initial fracture	4.3002
63	0.621634	State 2: Initial fracture	4.73022
64	0.656737	State 2: Initial fracture	5.16024
65	0.688779	State 2: Initial fracture	5.59026
66	0.717987	State 2: Initial fracture	6.02028
67	0.744578	State 2: Initial fracture	6.4503
68	0.768761	State 2: Initial fracture	6.88032
69	0.790735	State 2: Initial fracture	7.31034
70	0.810685	State 2: Initial fracture	7.74036
71	0.828786	State 2: Initial fracture	8.17038
72	0.845199	State 2: Initial fracture	8.6004
73	0.860073	State 2: Initial fracture	9.03042
74	0.873547	State 2: Initial fracture	9.46044
75	0.885746	State 2: Initial fracture	9.89046
76	0.896787	State 2: Initial fracture	10.3205
77	0.906777	State 2: Initial fracture	10.7505
78	0.915813	State 2: Initial fracture	11.1805
79	0.923983	State 2: Initial fracture	11.6105
80	0.931369	State 2: Initial fracture	12.0406
81	0.938044	State 2: Initial fracture	12.4706
82	0.944076	State 2: Initial fracture	12.9006
83	0.949525	State 2: Initial fracture	13.3306
84	0.954448	State 2: Initial fracture	13.7606
85	0.958893	State 2: Initial fracture	14.1907
86	0.962908	State 2: Initial fracture	14.6207
87	0.966532	State 2: Initial fracture	15.0507
88	0.969804	State 2: Initial fracture	15.4807
89	0.972758	State 2: Initial fracture	15.9107
90	0.975424	State 2: Initial fracture	16.3408
91	0.97783	State 2: Initial fracture	16.7708
92	0.980001	State 2: Initial fracture	17.2008
93	0.981961	State 2: Initial fracture	17.6308
94	0.983729	State 2: Initial fracture	18.0608
95	0.985324	State 2: Initial fracture	18.4909
96	0.986763	State 2: Initial fracture	18.9209
97	0.988061	State 2: Initial fracture	19.3509
98	0.989233	State 2: Initial fracture	19.7809
99	0.990289	State 2: Initial fracture	20.2109
100	0.991242	State 2: Initial fracture	20.641
101	0.992102	State 2: Initial fracture	21.071
102	0.992877	State 2: Initial fracture	21.501
103	0	State 3: Second fracture	0
104	0.242065	State 3: Second fracture	0.43002
105	0.419894	State 3: Second fracture	0.86004
106	0.55187	State 3: Second fracture	1.29006
107	0.650826	State 3: Second fracture	1.72008
108	0.725779	State 3: Second fracture	2.1501
109	0.78311	State 3: Second fracture	2.58012
110	0.827371	State 3: Second fracture	3.01014
111	0.86184	State 3: Second fracture	3.44016
112	0.888897	State 3: Second fracture	3.87018
113	0.910287	State 3: Second fracture	4.3002
114	0.927305	State 3: Second fracture	4.73022
115	0.940921	State 3: Second fracture	5.16024
116	0.951867	State 3: Second fracture	5.59026
117	0.960703	State 3: Second fracture	6.02028
118	0.967862	State 3: Second fracture	6.4503
119	0.973679	State 3: Second fracture	6.88032
120	0.978417	State 3: Second fracture	7.31034
121	0.982285	State 3: Second fracture	7.74036
122	0.985448	State 3: Second fracture	8.17038
123	0.988038	State 3: Second fracture	8.6004
124	0.990162	State 3: Second fracture	9.03042
125	0.991905	State 3: Second fracture	9.46044
126	0.993337	State 3: Second fracture	9.89046
127	0.994514	State 3: Second fracture	10.3205
128	0.995482	State 3: Second fracture	10.7505
129	0.996278	State 3: Second fracture	11.1805
130	0.996934	State 3: Second fracture	11.6105
131	0.997474	State 3: Second fracture	12.0406
132	0.997918	State 3: Second fracture	12.4706
133	0.998284	State 3: Second fracture	12.9006
134	0.998586	State 3: Second fracture	13.3306
135	0.998834	State 3: Second fracture	13.7606
136	0.999039	State 3: Second fracture	14.1907
137	0.999208	State 3: Second fracture	14.6207
138	0.999347	State 3: Second fracture	15.0507
139	0.999462	State 3: Second fracture	15.4807
140	0.999556	State 3: Second fracture	15.9107
141	0.999634	State 3: Second fracture	16.3408
142	0.999698	State 3: Second fracture	16.7708
143	0.999751	State 3: Second fracture	17.2008
144	0.999795	State 3: Second fracture	17.6308
145	0.999831	State 3: Second fracture	18.0608
146	0.999861	State 3: Second fracture	18.4909
147	0.999885	State 3: Second fracture	18.9209
148	0.999905	State 3: Second fracture	19.3509
149	0.999922	State 3: Second fracture	19.7809
150	0.999936	State 3: Second fracture	20.2109
151	0.999947	State 3: Second fracture	20.641
152	0.999956	State 3: Second fracture	21.071
153	0.999964	State 3: Second fracture	21.501
154	0	State 4: Third & further fracture	0
155	0.175523	State 4: Third & further fracture	0.43002
156	0.320238	State 4: Third & further fracture	0.86004
157	0.439551	State 4: Third & further fracture	1.29006
158	0.537923	State 4: Third & further fracture	1.72008
159	0.619028	State 4: Third & further fracture	2.1501
160	0.685897	State 4: Third & further fracture	2.58012
161	0.74103	State 4: Third & further fracture	3.01014
162	0.786485	State 4: Third & further fracture	3.44016
163	0.823962	State 4: Third & further fracture	3.87018
164	0.85486	State 4: Third & further fracture	4.3002
165	0.880336	State 4: Third & further fracture	4.73022
166	0.90134	State 4: Third & further fracture	5.16024
167	0.918657	State 4: Third & further fracture	5.59026
168	0.932934	State 4: Third & further fracture	6.02028
169	0.944706	State 4: Third & further fracture	6.4503
170	0.954411	State 4: Third & further fracture	6.88032
171	0.962413	State 4: Third & further fracture	7.31034
172	0.96901	State 4: Third & further fracture	7.74036
173	0.97445	State 4: Third & further fracture	8.17038
174	0.978934	State 4: Third & further fracture	8.6004
175	0.982632	State 4: Third & further fracture	9.03042
176	0.98568	State 4: Third & further fracture	9.46044
177	0.988194	State 4: Third & further fracture	9.89046
178	0.990266	State 4: Third & further fracture	10.3205
179	0.991975	State 4: Third & further fracture	10.7505
180	0.993383	State 4: Third & further fracture	11.1805
181	0.994545	State 4: Third & further fracture	11.6105
182	0.995502	State 4: Third & further fracture	12.0406
183	0.996292	State 4: Third & further fracture	12.4706
184	0.996943	State 4: Third & further fracture	12.9006
185	0.997479	State 4: Third & further fracture	13.3306
186	0.997922	State 4: Third & further fracture	13.7606
187	0.998286	State 4: Third & further fracture	14.1907
188	0.998587	State 4: Third & further fracture	14.6207
189	0.998835	State 4: Third & further fracture	15.0507
190	0.99904	State 4: Third & further fracture	15.4807
191	0.999208	State 4: Third & further fracture	15.9107
192	0.999347	State 4: Third & further fracture	16.3408
193	0.999462	State 4: Third & further fracture	16.7708
194	0.999556	State 4: Third & further fracture	17.2008
195	0.999634	State 4: Third & further fracture	17.6308
196	0.999698	State 4: Third & further fracture	18.0608
197	0.999751	State 4: Third & further fracture	18.4909
198	0.999795	State 4: Third & further fracture	18.9209
199	0.999831	State 4: Third & further fracture	19.3509
200	0.999861	State 4: Third & further fracture	19.7809
201	0.999885	State 4: Third & further fracture	20.2109
202	0.999905	State 4: Third & further fracture	20.641
203	0.999922	State 4: Third & further fracture	21.071
204	0.999936	State 4: Third & further fracture	21.501
