# Supplementary material for: Epidemiological transition to mortality and refracture following an initial fracture
Source: eLife journal article supplement (doi:10.7554/elife.61142), 2021-02-08
Supplement: supp [file elife-61142-supp-v1.zip]

# WOMEN

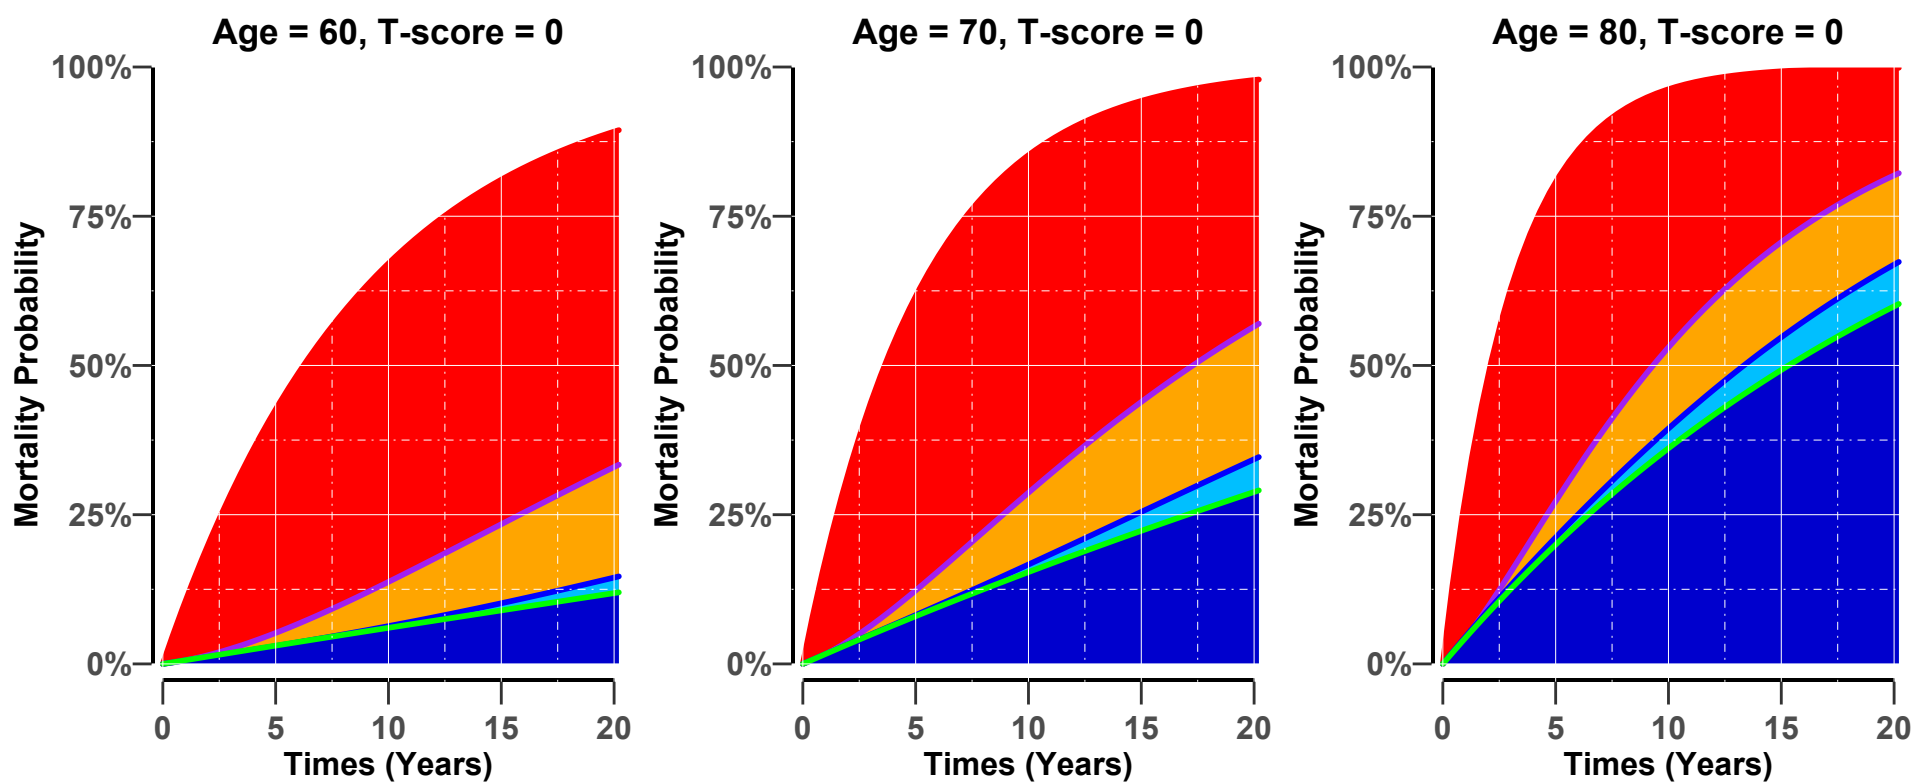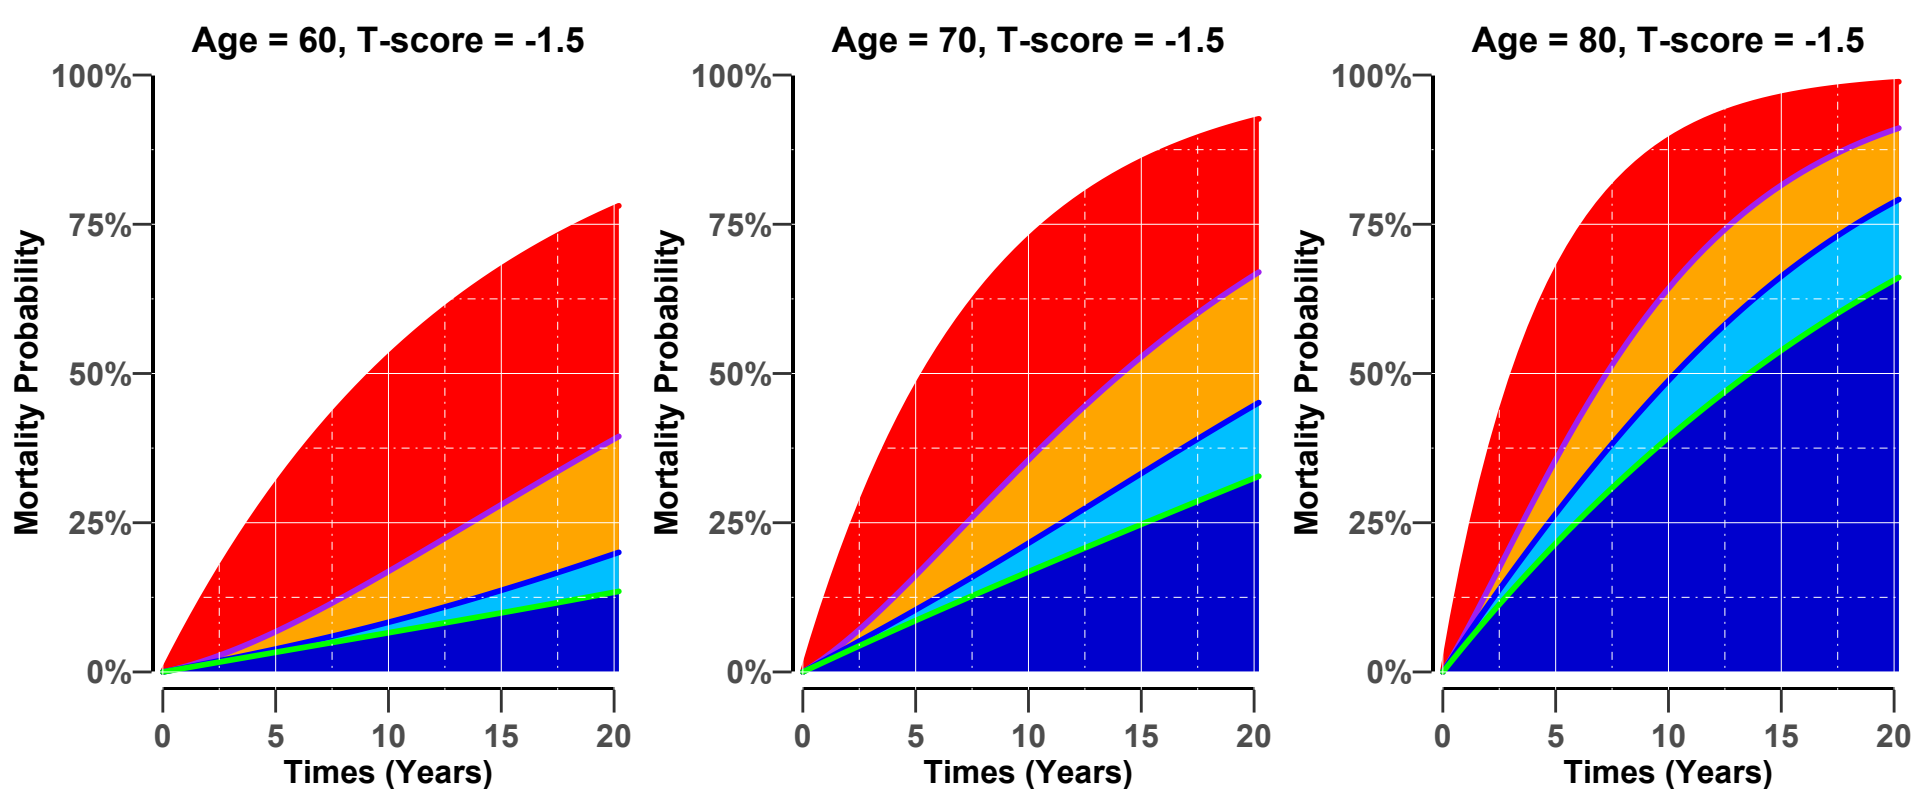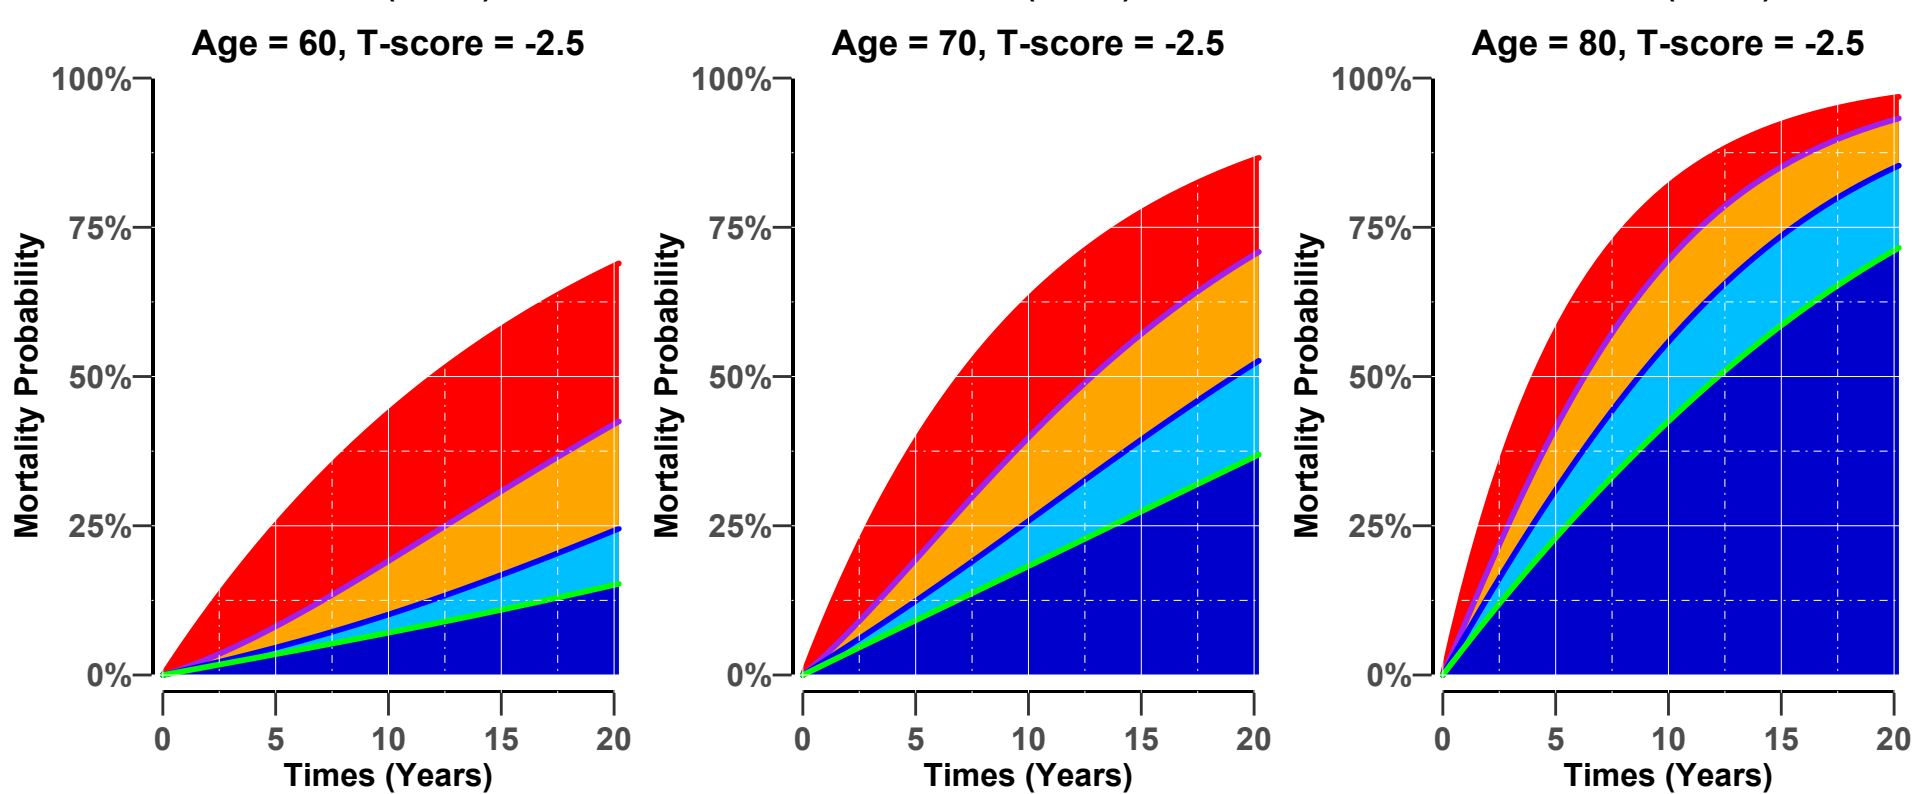

# MEN

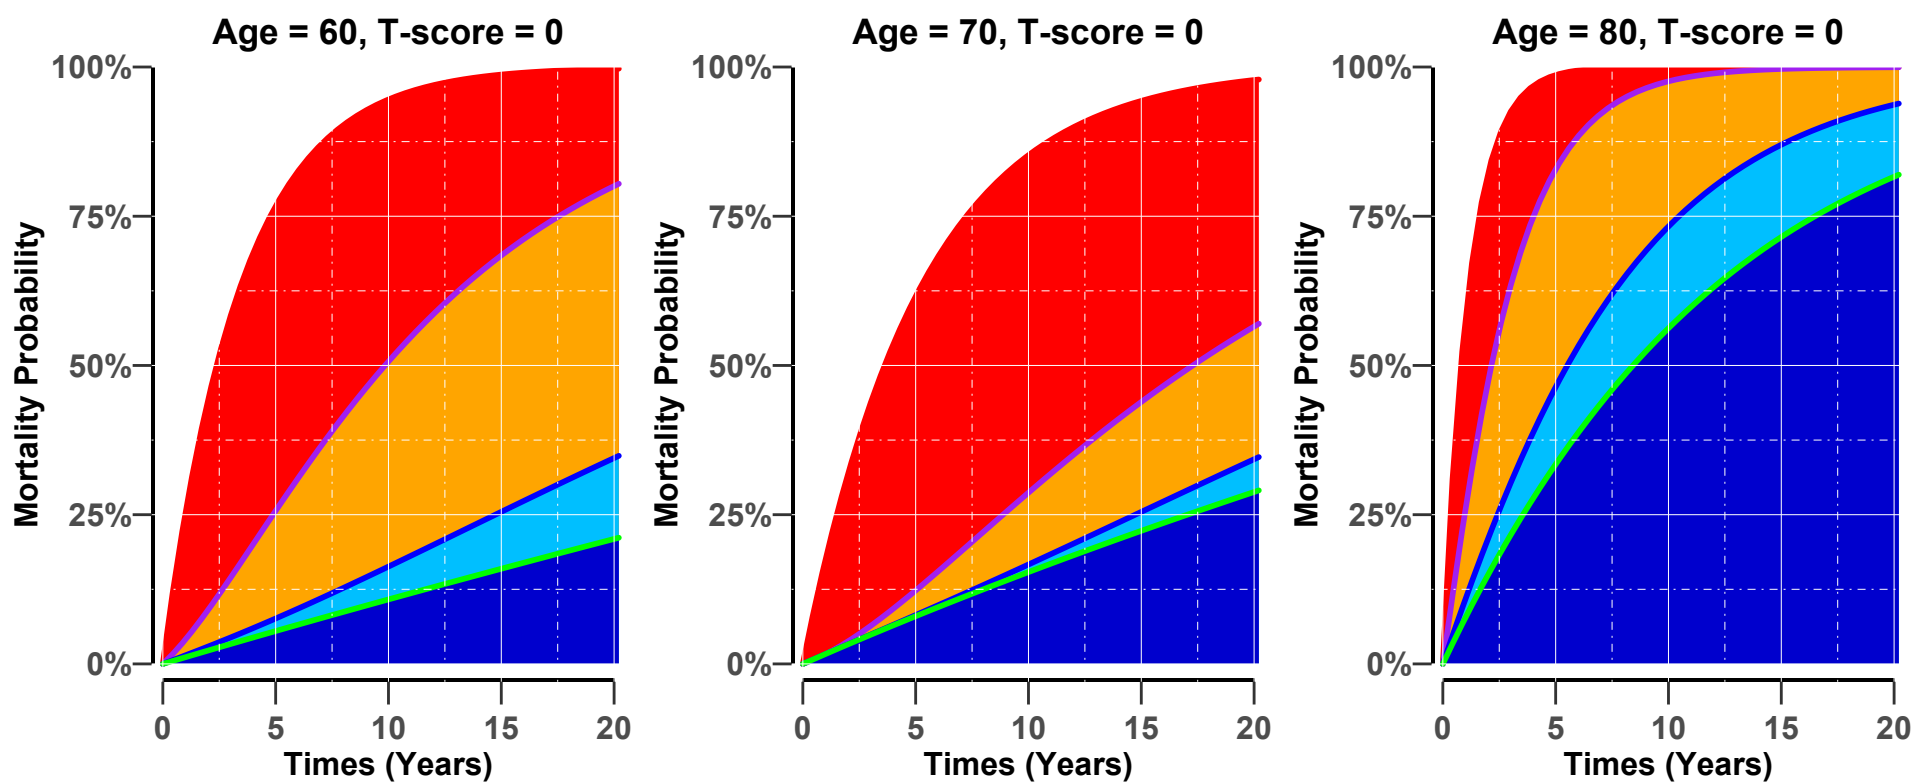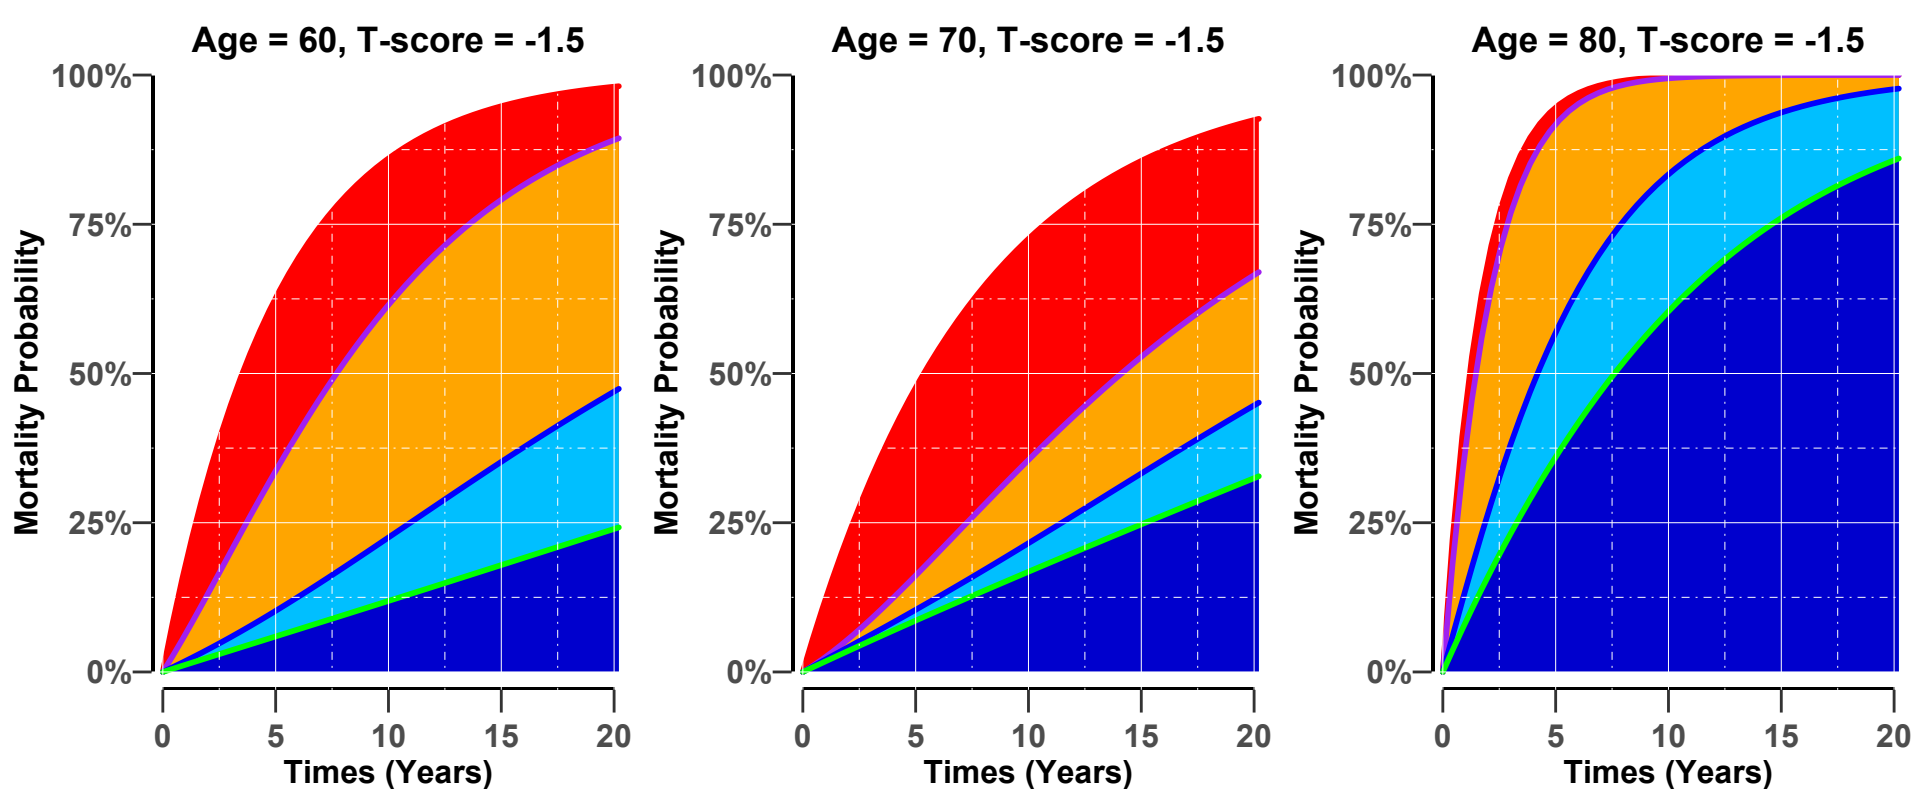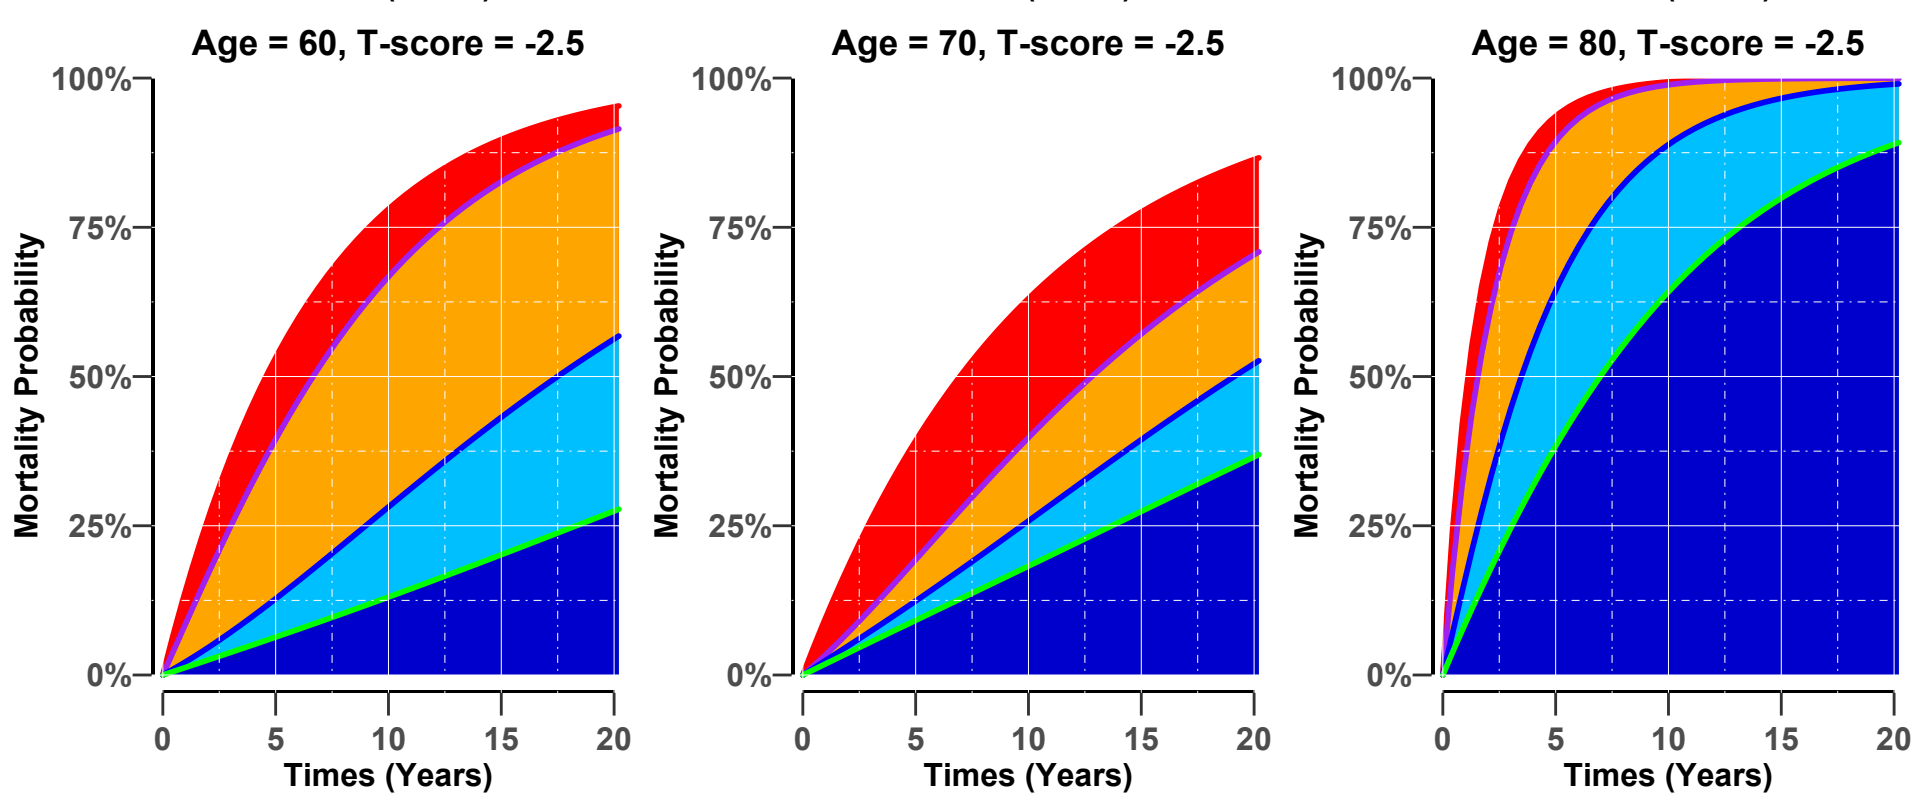

State 4: Third & further fracture State 3: Second fracture State 2: Initial fracture State 1: No fracture

State 4: Third & further fracture State 3: Second fracture State 2: Initial fracture State 1: No fracture
