# Supplementary figures and images for: Epidemiological transition to mortality and refracture following an initial fracture
Source: eLife journal article supplement (doi:10.7554/elife.61142), 2021-02-08

### Alive and free of fracture

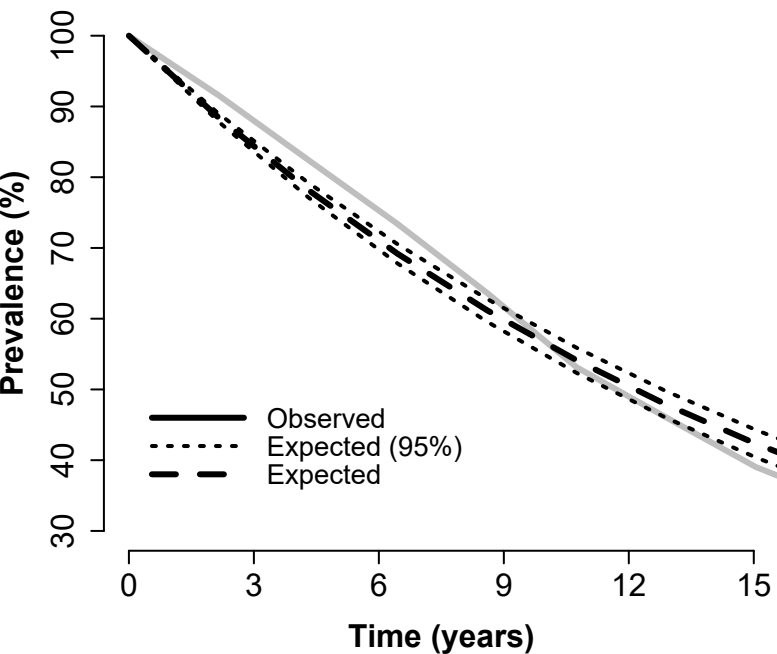

### Initial fracture

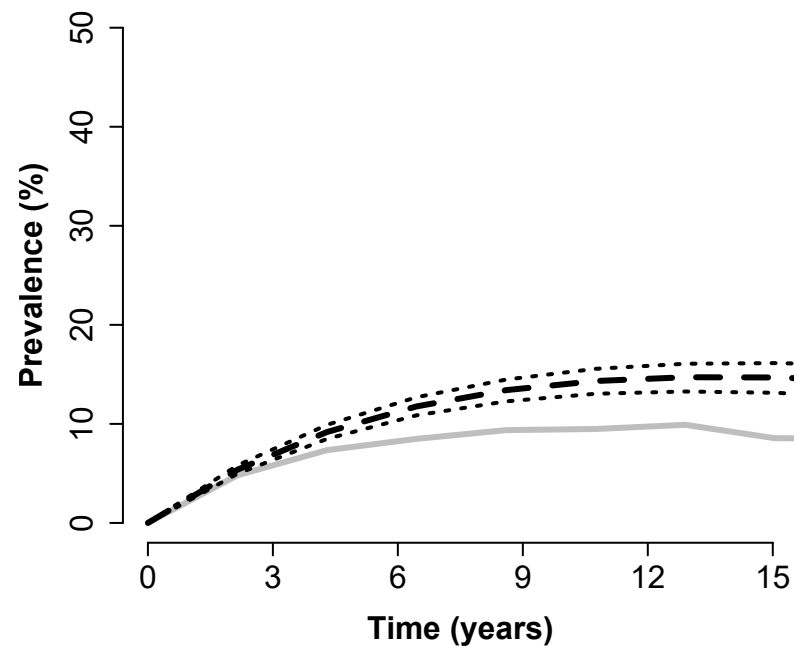

### Second fracture

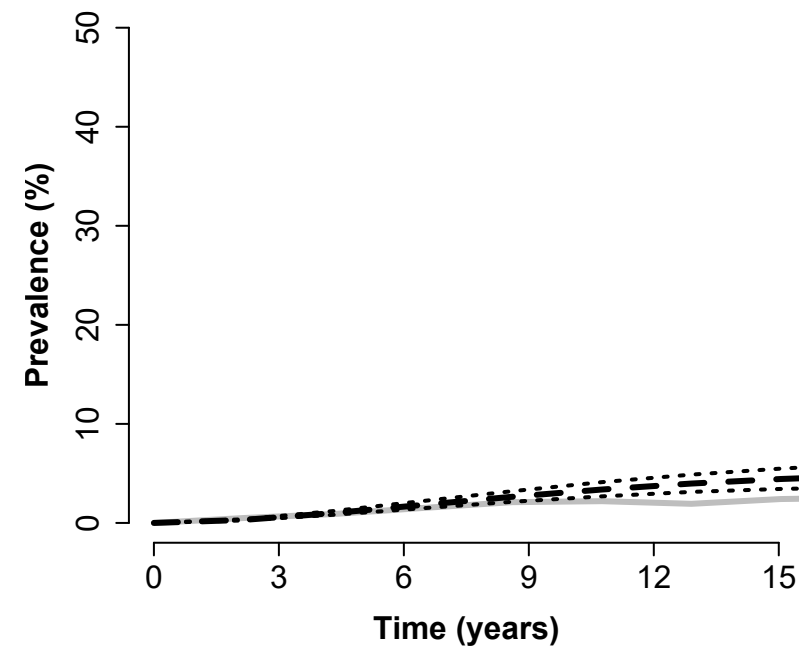

### Third+ fracture

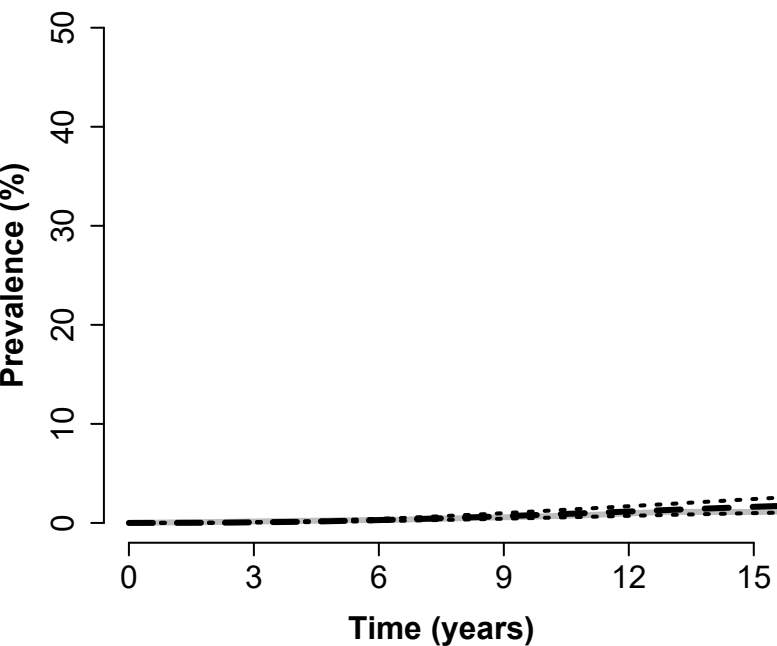

### Death

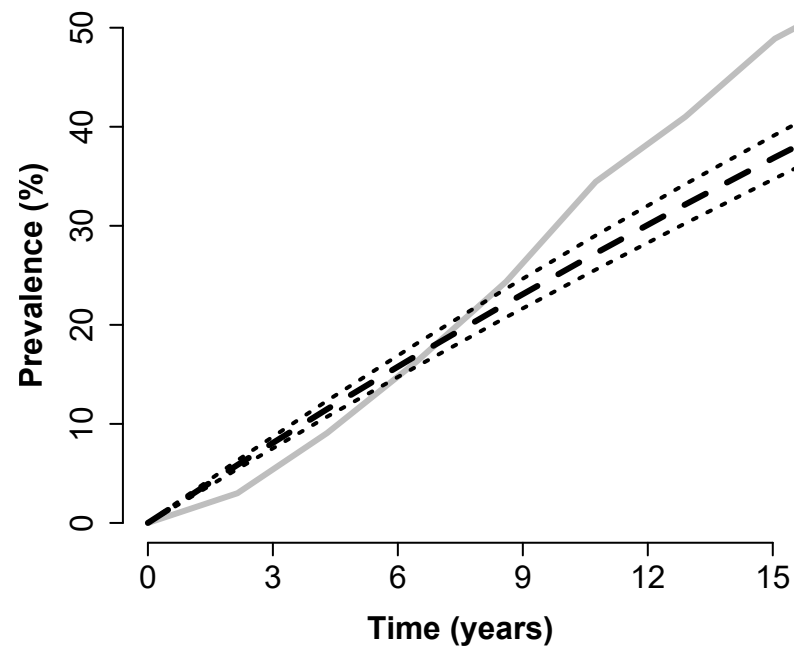

Supplement: supp [file elife-61142-supp-v1.zip]
